# Supplementary material for: Understanding heterogeneous growth mechanisms at graphene edges: a theoretical study on acetylene deposition and mechanistic analysis
Source: Royal Society of Chemistry journal article supplement (doi:10.1039/d4re00096j), 2024-01-01
Supplement: d4re00096j1.pdf [file d4re00096j1.pdf]

## Supplementary Material

### Understanding Heterogeneous Growth Mechanisms at Graphene Edges: a Theoretical Study on Acetylene Deposition and Mechanistic Analysis

C. Giudici<sup>1</sup>, G. Contaldo<sup>2</sup>, M. Ferri<sup>2</sup>, L. Pratali Maffei<sup>1</sup>,  
M. Bracconi<sup>2</sup>, M. Pelucchi<sup>1\*</sup>, M. Maestri<sup>2\*</sup>

<sup>1</sup>CRECK Modeling Laboratory, Department of Chemistry, Materials and Chemical Engineering,  
Politecnico di Milano, Piazza L. Da Vinci, 32, Milan, Italy

<sup>2</sup>Laboratory of Catalysis and Catalytic Processes, Department of Energy,  
Politecnico di Milano, Via Lambruschini, 4, Milan, Italy

#### Corresponding authors:

[\\*matteo.pelucchi@polimi.it](mailto:*matteo.pelucchi@polimi.it)

[\\*matteo.maestri@polimi.it](mailto:*matteo.maestri@polimi.it)

#### Content of this file:

**Table S1:** Kinetic constant parameters of all the individual reactions channels in the armchair PES.

**Table S2:** Kinetic constant parameters of all the individual reactions channels in the zigzag PES.

**Table S3:** Total energies and zero-point energy corrections of gas molecules, solid species and transition states.

**Table S4:** Cartesian atomic coordinates of the unit cell of reactants, intermediates, and products, involved in C<sub>2</sub>H<sub>2</sub> deposition on armchair and zigzag graphene edges.

**Table S5:** Cartesian atomic coordinates of the unit cell of transition states involved in C<sub>2</sub>H<sub>2</sub> deposition on armchair and zigzag graphene edges.

**Figure S1:** Relative energies of intermediates and TS involved in C<sub>2</sub>H<sub>2</sub> deposition on zigzag site compared to that observed in the '1-naphthyl+ C<sub>2</sub>H<sub>2</sub>' PES.

**Figure S2:** Linear correlations of relative intermediate and TS energies between solid-phase graphene growth and similar PAH growth in gas phase differentiating resonant intermediates and associated TS (a.) from non-resonant intermediates and corresponding TS (b.).

**Figure S3:** Comparison between the performances of the detailed (solid lines) and lumped mechanisms of zigzag edge growth.

**Figure S4:** Comparison between the performances of the detailed (solid lines) and lumped mechanisms of zigzag edge growth.

**Figure S5:** Total energy of the system [Ry] per atom with respect to *E*<sub>cut</sub> (*rho*) and *E*<sub>cut</sub> (*wfc*) for armchair (left) and zigzag (right) graphene.

**Figure S6:** Total energy of the system [Ry] per atom with respect to k-points for armchair (left) and zigzag (right) graphene.

**Figure S7:** *H* scission energy [*E*<sub>C-H</sub>, Ry] and C<sub>2</sub>H<sub>2</sub> binding energy [*E*<sub>C<sub>2</sub>H<sub>2</sub>-binding</sub>, Ry] varying the width of graphene along the x direction (i.e., *cell*<sub>dm</sub>(2) ) for armchair (a1. and a2., respectively) and zigzag (b1. and b2., respectively) graphene edges.

**Figure S8:** Parameters of fitted modified Arrhenius expressions  $k = AT^n \exp\left[\frac{f_0}{RT}\right] \exp\left[-\frac{E_a}{RT}\right]$  for rate constants of individual reactions channels in the zigzag PES considering 800-1900 K temperature range.

Pre-exponential factors  $A$  are given in  $\text{cm}^3 \text{ mol}^{-1} \text{ s}^{-1}$  or  $\text{s}^{-1}$  for bimolecular and unimolecular reactions, respectively, and  $E_a$  are given in  $\text{cal mol}^{-1}$ . The pre-exponential factor ( $A$ ) of the addition/decomposition step (marked with \*) are corrected to account for the effect of the hindered rotor treatment found for the analogous gas phase system (see the “Hindered rotor effects” section).

**Figure S9:** Torsional potential [kcal/mol] related to the torsion in the ethenyl group ( $\text{R-CH}=\dot{\text{C}}\text{H}$ ) at the zigzag edge (solid line) and in the analogous gas phase molecule (dotted line).

Table S1: Parameters of fitted modified Arrhenius expressions  $k = AT^n \exp(-E_a/RT)$  for rate constants of individual reactions channels in the armchair PES considering 800-1900 K temperature range. Pre-exponential factors  $A$  are given in  $\text{cm}^3 \text{mol}^{-1} \text{s}^{-1}$  or  $\text{s}^{-1}$  for bimolecular and unimolecular reactions, respectively, and  $E_a$  are given in  $\text{cal mol}^{-1}$ .

| Reaction    | A [cm <sup>3</sup> , mol, s] | n []  | Ea [cal/mol] |
|-------------|------------------------------|-------|--------------|
| A0+C2H2=>A1 | 2.73E+03                     | 2.63  | 1496.27      |
| A1=>A2      | 2.01E+12                     | 0.08  | 12450.02     |
| A2=>A3      | 2.75E+12                     | 0.35  | 19043.65     |
| A3=>A4+H    | 5.02E+11                     | 0.71  | 43420.48     |
| A2=>A4+H    | 1.27E+12                     | 0.72  | 20087.59     |
| A0+C2H2=>B1 | 3.70E+03                     | 2.54  | 268.62       |
| B1=>B2      | 6.66E+12                     | 0.44  | 37525.34     |
| B2=>A1      | 3.59E+12                     | 0.60  | 53435.97     |
| B2=>C3+H    | 7.72E+13                     | 0.61  | 66874.07     |
| A0+C2H2=>C1 | 1.44E+01                     | 3.14  | -2664.67     |
| C2=>C3+H    | 6.03E+12                     | 0.55  | 34771.39     |
| B2=>B3      | 7.84E+11                     | 0.51  | 21236.56     |
| B3=>B4      | 1.20E+12                     | 0.01  | 550.94       |
| B4=>B5      | 2.03E+11                     | 0.31  | 24370.70     |
| B5=>B6+H    | 2.96E+11                     | 0.79  | 51841.06     |
| B4=>B6+H    | 1.44E+11                     | 0.69  | 29810.05     |
| C1=>C2      | 3.95E+11                     | 0.42  | 19962.64     |
| B2=>C1      | 2.91E+12                     | 0.58  | 53045.68     |
| B1=>C1      | 1.55E+13                     | 0.06  | 3236.54      |
| C1=>C3+H    | 4.14E+12                     | 0.66  | 37907.59     |
| A1=>A0+C2H2 | 4.14E+12                     | 0.66  | 37907.59     |
| A2=>A1      | 1.03E+14                     | 0.33  | 56438.07     |
| A3=>A2      | 6.03E+11                     | 0.35  | 33350.08     |
| A4+H=>A3    | 5.15E+08                     | 1.44  | 12737.32     |
| A4+H=>A2    | 1.94E+08                     | 1.49  | 3594.51      |
| B1=>A0+C2H2 | 8.36E+11                     | 1.03  | 65733.05     |
| B2=>B1      | 2.44E+12                     | 0.58  | 53761.98     |
| A1=>B2      | 2.01E+12                     | 0.41  | 35222.98     |
| C3+H=>B2    | 1.84E+10                     | 1.27  | 15707.67     |
| C1=>A0+C2H2 | 2.05E+12                     | 0.66  | 38108.70     |
| C3+H=>C2    | 8.68E+08                     | 1.25  | 1601.58      |
| B3=>B2      | 3.93E+11                     | 0.47  | 9018.86      |
| B4=>B3      | 2.78E+12                     | -0.14 | 15145.49     |
| B5=>B4      | 7.81E+10                     | 0.56  | 48808.97     |
| B6+H=>B5    | 1.59E+09                     | 1.40  | -247.81      |
| B6+H=>B4    | 3.92E+08                     | 1.52  | 2252.70      |
| C2=>C1      | 4.66E+11                     | 0.43  | 17582.83     |
| C1=>B2      | 2.91E+12                     | 0.58  | 53045.68     |
| C1=>B1      | 1.18E+13                     | 0.09  | 3975.61      |
| C3+H=>C1    | 5.16E+08                     | 1.41  | 2255.72      |
| B4=>A3      | 9.25E+11                     | -0.10 | 12171.78     |
| A3=>B4      | 2.98E+12                     | 0.21  | 49736.14     |
| A1=>B1      | 1.82E+12                     | -0.08 | 42773.04     |
| B1=>A1      | 6.39E+12                     | 0.01  | 44652.05     |

Table S2: Parameters of fitted modified Arrhenius expressions  $k = AT^n \exp\left(\frac{-E_a}{RT}\right)$  for rate constants of individual reactions channels in the zigzag PES considering 800-1900 K temperature range. Pre-exponential factors  $A$  are given in  $\text{cm}^3 \text{mol}^{-1} \text{s}^{-1}$  or  $\text{s}^{-1}$  for bimolecular and unimolecular reactions, respectively, and  $E_a$  are given in  $\text{cal mol}^{-1}$ . The pre-exponential factor ( $A$ ) of the addition/decomposition step (marked with \*) are corrected to account for the effect of the hindered rotor treatment found for the analogous gas phase system (see the “**Hindered rotor effects**” section).

| Reaction     | A [ $\text{cm}^3, \text{mol}, \text{s}$ ] | n [] | Ea [cal/mol] |
|--------------|-------------------------------------------|------|--------------|
| Z0+C2H2=>Z1* | 7.74E+03 (9.67E+03)                       | 2.60 | -1810.49     |
| Z1=>Z2       | 6.30E+13                                  | 0.11 | 3557.38      |
| Z2=>Z3       | 4.15E+12                                  | 0.27 | 13488.42     |
| Z3=>Z4+H     | 7.16E+12                                  | 0.74 | 66161.83     |
| Z1=>Y1       | 1.91E+13                                  | 0.12 | 3050.03      |
| Y1=>Y2       | 1.40E+13                                  | 0.20 | 20093.89     |
| Y2=>Y3+H     | 1.10E+13                                  | 0.84 | 69690.18     |
| Y1=>Y3+H*    | 2.48E+13 (2.48E+13)                       | 0.62 | 40828.40     |
| Y1=>X1       | 1.57E+11                                  | 0.48 | 3593.30      |
| X1=>Z3       | 7.63E+11                                  | 0.08 | 314.38       |
| Z0+C2H2=>Y1* | 3.20E+03 (4.00E+03)                       | 2.49 | 1411.55      |
| Z1=>Z0+C2H2* | 4.10E+14 (8.20E+14)                       | 0.22 | 41525.69     |
| Z2=>Z1       | 1.02E+15                                  | 0.22 | 60370.99     |
| Z3=>Z2       | 1.26E+12                                  | 0.26 | 26502.46     |
| Z4+H=>Z3     | 1.78E+09                                  | 1.53 | -1153.28     |
| Y1=>Z1       | 1.51E+13                                  | 0.05 | 5259.19      |
| Y2=>Y1       | 4.92E+12                                  | 0.44 | 57644.90     |
| Y3+H=>Y2     | 1.06E+09                                  | 1.47 | -469.78      |
| Y3+H=>Y1*    | 1.50E+08 (9.37E+07)                       | 1.47 | 8254.74      |
| X1=>Y1       | 7.56E+10                                  | 0.61 | 2882.37      |
| Z3=>X1       | 1.41E+13                                  | 0.09 | 68765.58     |
| Y1=>Z0+C2H2* | 1.43E+14 (2.85E+14)                       | 0.03 | 46978.36     |

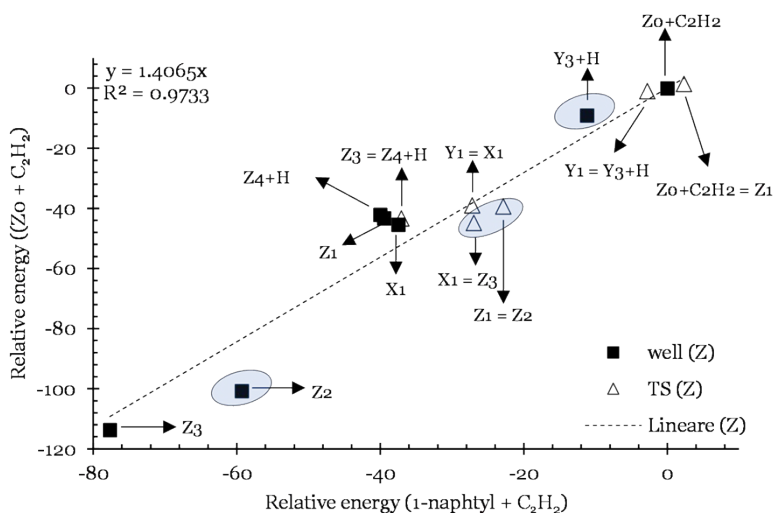

Figure S1: Relative energies of the intermediates (solid squares) and transition states (empty triangles) for the C<sub>2</sub>H<sub>2</sub> deposition on zigzag site compared to that observed in the '1-naphthyl + C<sub>2</sub>H<sub>2</sub>' PES from [1]. TS with larger deviations from the linear correlations found for are highlighted by circles.

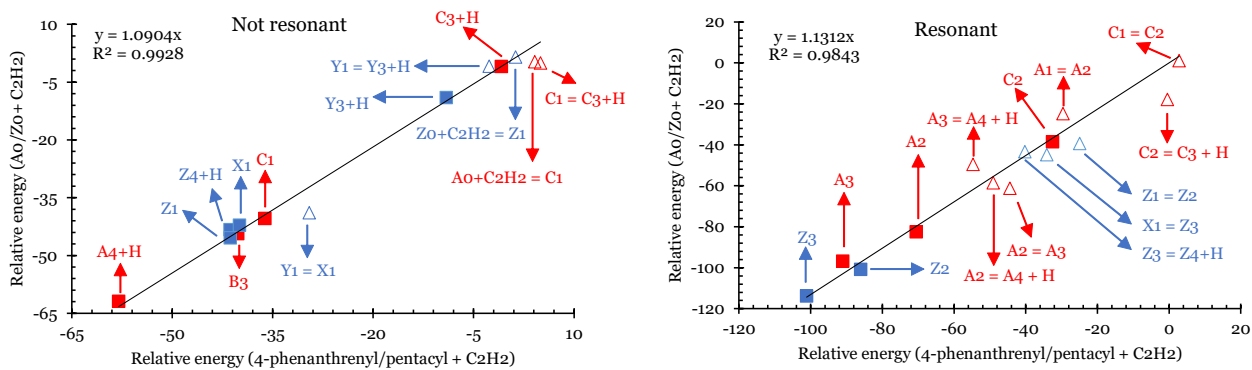

Figure S2: Relative energies of the intermediates (solid squares) and transition states (empty triangles) related to compared to that observed in PESs of analogous gas phase prototypes from [1, 2] for the  $C_2H_2$  deposition on armchair and zigzag sites: a. resonant intermediates and their associated transition states; b. non-resonant intermediates and reactions not involving resonant radical intermediates.

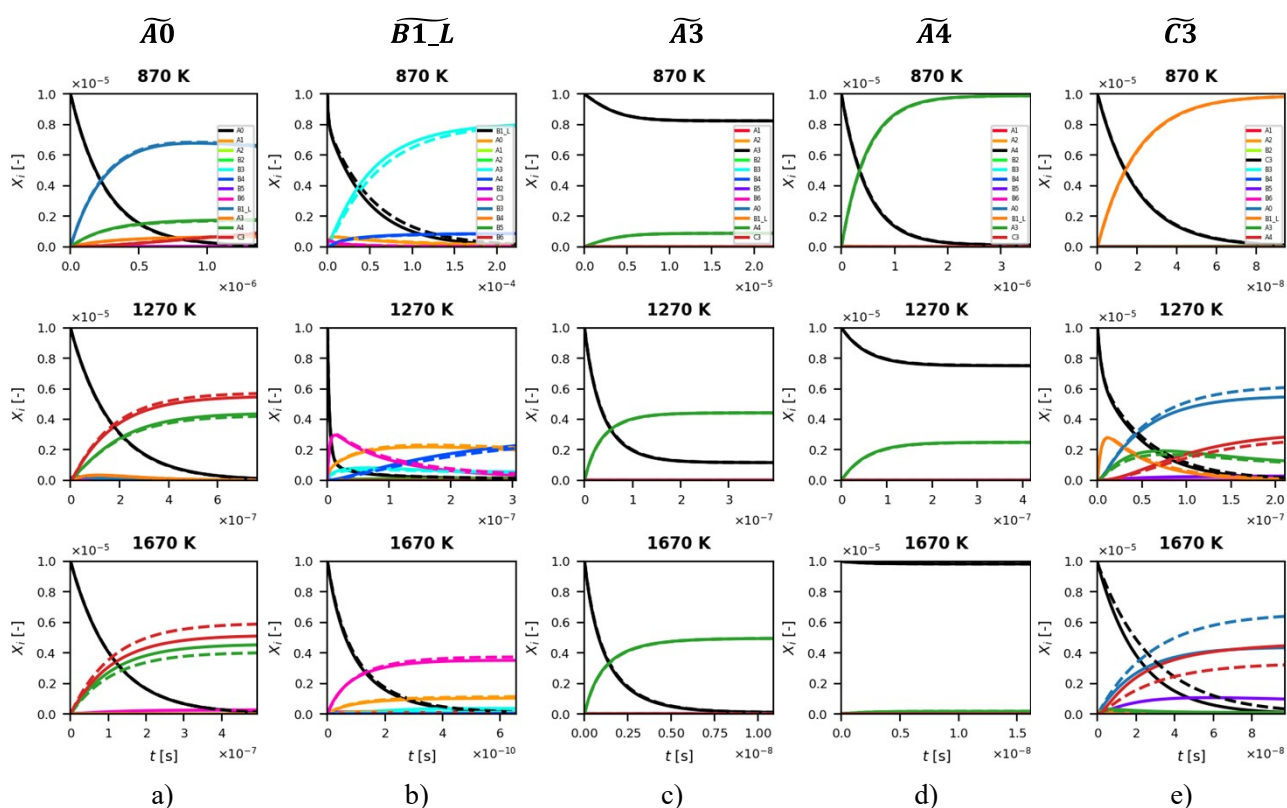

Figure S3: Comparison between the performances of the detailed (solid lines) and lumped with MEL [3] (dashed lines) mechanisms of armchair graphene edge growth in the 800–1900 K range of the reactivity of pseudospecies  $\tilde{A}0$  a),  $\tilde{B}1L$  b),  $\tilde{A}3$  c),  $\tilde{A}4$  d) and  $\tilde{C}3$  e).

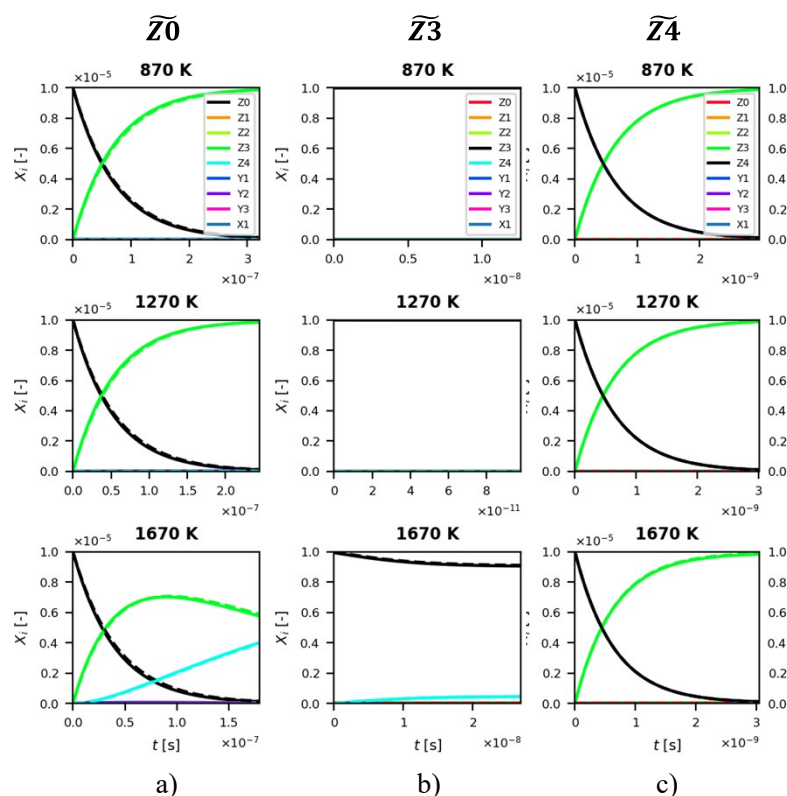

Figure S4: Comparison between the performances of the detailed (solid lines) and lumped with MEL [3] (dashed lines) mechanisms of zigzag graphene edge growth in the 800–1900 K range of the reactivity of pseudospecies  $\bar{Z}0$  a),  $\bar{Z}3$  b),  $\bar{Z}4$  c).

Table S1: Total energies and zero-point energy corrections of gas molecules, solid species and transition states. ZPE corrections are estimates by vibrating the six atoms mainly involved.

| gas species   |                   | Total Energy [eV] |             | ZPE [kcal/mol]    |                |
|---------------|-------------------|-------------------|-------------|-------------------|----------------|
| C2H2          |                   | -531.338          |             | 16.58             |                |
| H             |                   | -13.600           |             |                   |                |
| zigzag edge   |                   |                   |             |                   |                |
| species       | Total Energy [eV] | ZPE [kcal/mol]    | TS          | Total Energy [eV] | ZPE [kcal/mol] |
| Z0            | -12153.359        | 10.33             | Z0+C2H2=>Z1 | -12684.631        | 26.91          |
| Z1            | -12686.573        | 29.24             | Z1=>Z2      | -12686.401        | 27.65          |
| Z2            | -12689.066        | 31.55             | Z2=>Z3      | -12688.407        | 29.04          |
| Z3            | -12689.629        | 31.06             | Z3=>Z4+H    | -12686.573        | 24.61          |
| Z4            | -12672.925        | 24.38             | Y1=>X1      | -12686.383        | 26.41          |
| Y1            | -12686.651        | 28.71             | X1=>Z3      | -12686.639        | 29.89          |
| Y2            | -12688.331        | 29.93             | Z1=>Y1      | -12686.423        | 27.91          |
| Y3            | -12671.489        | 22.67             | Y1=>Y2      | -12685.719        | 26.52          |
| X1            | -12686.641        | 30.19             | Y1=>Y3+H    | -12684.734        | 23.75          |
|               |                   |                   | Y2=>Y3+H    | -12685.127        | 23.55          |
|               |                   |                   | Z0+C2H2=>Y1 | -12684.630        | 27.06          |
| armchair edge |                   |                   |             |                   |                |
| species       | Total Energy [eV] | ZPE [kcal/mol]    | TS          | Total Energy [eV] | ZPE [kcal/mol] |
| A0            | -12153.028        | 10.56             | A0+C2H2=A1  | -12684.279        | 27.26          |
| A1            | -12685.993        | 29.15             | A1=A2       | -12685.440        | 28.23          |

|    |            |       |            |            |       |
|----|------------|-------|------------|------------|-------|
| A2 | -12687.941 | 31.73 | A2=A3      | -12687.021 | 28.67 |
| A3 | -12688.561 | 31.27 | A3=A4+H    | -12686.515 | 26.24 |
| A4 | -12673.450 | 25.21 | A2=A4+H    | -12686.900 | 26.20 |
| B1 | -12686.086 | 29.47 | A0+C2H2=B1 | -12684.341 | 27.24 |
| B2 | -12686.811 | 29.75 | B1=B2      | -12684.348 | 25.58 |
| B3 | -12686.289 | 30.23 | A1=B2      | -12684.355 | 25.41 |
| B4 | -12686.880 | 29.04 | B2=B3      | -12685.758 | 26.43 |
| B5 | -12687.982 | 30.37 | B3=B4      | -12686.255 | 29.70 |
| B6 | -12671.920 | 23.89 | B4=B5      | -12685.747 | 27.19 |
| C1 | -12686.118 | 29.33 | B5=B6+H    | -12685.544 | 24.38 |
| C2 | -12686.033 | 29.96 | B4=B6+H    | -12685.420 | 24.45 |
| C3 | -12670.808 | 23.18 | B4=A3      | -12686.373 | 25.44 |
|    |            |       | B2=C1      | -12684.375 | 25.44 |
|    |            |       | B2=C3+H    | -12683.758 | 23.73 |
|    |            |       | B1=C1      | -12685.935 | 28.34 |
|    |            |       | A0+C2H2=C1 | -12684.355 | 27.28 |
|    |            |       | C2=C3+H    | -12684.317 | 24.05 |
|    |            |       | C1=C3+H    | -12684.368 | 23.80 |
|    |            |       | C1=C2      | -12685.140 | 26.45 |
|    |            |       | A1=B1      | -12685.042 | 29.15 |

Table S4: Cartesian atomic coordinates (Angstrom) of the unit cell of acetylene and solid structures (i.e., reactants, intermediates, and products) with armchair and zigzag edges.

| C2H2 |         |        |         | A0 |        |         |        | A1 |        |         |        |
|------|---------|--------|---------|----|--------|---------|--------|----|--------|---------|--------|
| H    | 0.0008  | 4.6403 | 6.9244  | C  | 0.0140 | 21.2590 | 8.0009 | C  | 0.0357 | 21.2541 | 8.0029 |
| C    | -0.0013 | 4.7294 | 7.9911  | C  | 0.7335 | 22.4665 | 8.0002 | C  | 0.7547 | 22.4620 | 8.0034 |
| C    | -0.0011 | 4.8373 | 9.1935  | C  | 2.1063 | 22.4663 | 8.0001 | C  | 2.1277 | 22.4635 | 8.0018 |
| H    | 0.0005  | 4.9420 | 10.2590 | C  | 2.8261 | 21.2589 | 8.0009 | C  | 2.8475 | 21.2559 | 8.0027 |
|      |         |        |         | C  | 4.2736 | 21.2585 | 8.0008 | C  | 4.2951 | 21.2545 | 8.0055 |
|      |         |        |         | C  | 4.9934 | 22.4658 | 8.0002 | C  | 5.0144 | 22.4617 | 8.0055 |
|      |         |        |         | C  | 6.3665 | 22.4657 | 8.0003 | C  | 6.3873 | 22.4632 | 8.0058 |
|      |         |        |         | C  | 7.0865 | 21.2584 | 8.0009 | C  | 7.1083 | 21.2560 | 8.0042 |
|      |         |        |         | C  | 0.0014 | 18.7873 | 8.0010 | C  | 0.0240 | 18.7822 | 7.9944 |
|      |         |        |         | C  | 0.7065 | 20.0302 | 8.0011 | C  | 0.7288 | 20.0254 | 7.9986 |
|      |         |        |         | C  | 2.1340 | 20.0301 | 8.0011 | C  | 2.1565 | 20.0262 | 8.0009 |
|      |         |        |         | C  | 2.8396 | 18.7873 | 8.0010 | C  | 2.8619 | 18.7833 | 8.0015 |
|      |         |        |         | C  | 4.2608 | 18.7865 | 8.0009 | C  | 4.2831 | 18.7834 | 8.0011 |
|      |         |        |         | C  | 4.9665 | 20.0295 | 8.0010 | C  | 4.9881 | 20.0263 | 8.0030 |
|      |         |        |         | C  | 6.3941 | 20.0294 | 8.0010 | C  | 6.4162 | 20.0269 | 8.0006 |
|      |         |        |         | C  | 7.1002 | 18.7865 | 8.0008 | C  | 7.1225 | 18.7840 | 7.9957 |
|      |         |        |         | C  | 0.0036 | 16.3288 | 8.0007 | C  | 0.0253 | 16.3221 | 8.0031 |
|      |         |        |         | C  | 0.7019 | 17.5569 | 8.0009 | C  | 0.7243 | 17.5505 | 7.9953 |
|      |         |        |         | C  | 2.1396 | 17.5569 | 8.0009 | C  | 2.1619 | 17.5517 | 7.9991 |
|      |         |        |         | C  | 2.8384 | 16.3290 | 8.0008 | C  | 2.8600 | 16.3236 | 8.0010 |
|      |         |        |         | C  | 4.2632 | 16.3277 | 8.0007 | C  | 4.2851 | 16.3246 | 8.0012 |
|      |         |        |         | C  | 4.9617 | 17.5558 | 8.0008 | C  | 4.9837 | 17.5529 | 7.9996 |
|      |         |        |         | C  | 6.3997 | 17.5556 | 8.0008 | C  | 6.4217 | 17.5535 | 7.9979 |
|      |         |        |         | C  | 7.0988 | 16.3274 | 8.0007 | C  | 7.1202 | 16.3251 | 8.0048 |
|      |         |        |         | C  | 0.0096 | 13.8611 | 8.0007 | C  | 0.0323 | 13.8512 | 8.0646 |

|   |         |         |        |         |         |         |        |         |         |         |        |
|---|---------|---------|--------|---------|---------|---------|--------|---------|---------|---------|--------|
|   |         |         | C      | 0.7088  | 15.0880 | 8.0006  | C      | 0.7308  | 15.0799 | 8.0217  |        |
|   |         |         | C      | 2.1336  | 15.0880 | 8.0006  | C      | 2.1551  | 15.0820 | 8.0113  |        |
|   |         |         | C      | 2.8330  | 13.8608 | 8.0008  | C      | 2.8542  | 13.8545 | 8.0310  |        |
|   |         |         | C      | 4.2706  | 13.8574 | 8.0007  | C      | 4.2914  | 13.8565 | 8.0420  |        |
|   |         |         | C      | 4.9687  | 15.0856 | 8.0007  | C      | 4.9903  | 15.0840 | 8.0156  |        |
|   |         |         | C      | 6.3936  | 15.0848 | 8.0006  | C      | 6.4154  | 15.0843 | 8.0251  |        |
|   |         |         | C      | 7.0923  | 13.8563 | 8.0006  | C      | 7.1155  | 13.8580 | 8.0683  |        |
|   |         |         | C      | 0.0025  | 11.3941 | 8.0011  | C      | 0.0295  | 11.3713 | 8.1229  |        |
|   |         |         | C      | 0.7116  | 12.6327 | 8.0010  | C      | 0.7333  | 12.6195 | 8.0992  |        |
|   |         |         | C      | 2.1335  | 12.6319 | 8.0010  | C      | 2.1539  | 12.6251 | 8.0789  |        |
|   |         |         | C      | 2.8427  | 11.3913 | 8.0013  | C      | 2.8580  | 11.3881 | 8.1876  |        |
|   |         |         | C      | 4.2689  | 11.3824 | 8.0010  | C      | 4.2864  | 11.3942 | 8.2290  |        |
|   |         |         | C      | 4.9723  | 12.6259 | 8.0008  | C      | 4.9924  | 12.6303 | 8.1179  |        |
|   |         |         | C      | 6.3919  | 12.6243 | 8.0006  | C      | 6.4155  | 12.6301 | 8.1238  |        |
|   |         |         | C      | 7.0948  | 11.3778 | 8.0006  | C      | 7.1204  | 11.3912 | 8.1592  |        |
|   |         |         | C      | -0.0391 | 9.0089  | 8.0011  | C      | -0.0119 | 8.9350  | 7.8609  |        |
|   |         |         | C      | 0.7125  | 10.1707 | 8.0013  | C      | 0.7255  | 10.1378 | 8.0927  |        |
|   |         |         | C      | 2.1525  | 10.1669 | 8.0015  | C      | 2.1641  | 10.1613 | 8.2949  |        |
|   |         |         | C      | 2.8477  | 8.9475  | 8.0010  | C      | 2.8814  | 9.0130  | 8.6928  |        |
|   |         |         | C      | 4.2225  | 8.9383  | 8.0003  | C      | 4.2595  | 9.0156  | 8.7263  |        |
|   |         |         | C      | 4.9526  | 10.1444 | 8.0007  | C      | 4.9824  | 10.1774 | 8.3918  |        |
|   |         |         | C      | 6.4017  | 10.1444 | 8.0006  | C      | 6.4232  | 10.1667 | 8.2348  |        |
|   |         |         | C      | 7.1304  | 8.9239  | 8.0011  | C      | 7.1261  | 8.9718  | 8.0253  |        |
|   |         |         | H      | 2.2758  | 8.0182  | 8.0002  | H      | 2.3411  | 8.1093  | 8.9608  |        |
|   |         |         | H      | 4.7397  | 7.9815  | 7.9982  | H      | 4.7897  | 8.1106  | 9.0246  |        |
|   |         |         | H      | 6.6220  | 7.9611  | 8.0016  | H      | 6.5672  | 8.0452  | 7.8886  |        |
|   |         |         | H      | 0.2151  | 23.4219 | 7.9985  | H      | 0.2348  | 23.4165 | 8.0005  |        |
|   |         |         | H      | 2.6247  | 23.4217 | 7.9981  | H      | 2.6448  | 23.4193 | 8.0003  |        |
|   |         |         | H      | 4.4749  | 23.4211 | 7.9981  | H      | 4.4946  | 23.4158 | 8.0003  |        |
|   |         |         | H      | 6.8848  | 23.4211 | 7.9985  | H      | 6.9047  | 23.4191 | 8.0016  |        |
|   |         |         |        |         |         |         | H      | -0.1573 | 6.8169  | 7.4270  |        |
|   |         |         |        |         |         |         | C      | 0.5170  | 7.6745  | 7.2838  |        |
|   |         |         |        |         |         |         | C      | 1.5776  | 7.4811  | 6.5242  |        |
|   |         |         |        |         |         |         | H      | 2.4356  | 8.0106  | 6.1243  |        |
|   |         | A2      |        |         |         | A3      |        |         |         | A4      |        |
| C | 0.0015  | 21.2875 | 8.0064 | C       | 0.0384  | 21.2841 | 8.0069 | C       | 0.0237  | 21.2720 | 8.0180 |
| C | 0.7244  | 22.4984 | 8.0049 | C       | 0.7626  | 22.4944 | 8.0066 | C       | 0.7466  | 22.4816 | 8.0237 |
| C | 2.0935  | 22.4988 | 8.0047 | C       | 2.1325  | 22.4944 | 8.0068 | C       | 2.1172  | 22.4813 | 8.0229 |
| C | 2.8183  | 21.2872 | 8.0083 | C       | 2.8553  | 21.2851 | 8.0074 | C       | 2.8384  | 21.2714 | 8.0171 |
| C | 4.2603  | 21.2873 | 8.0076 | C       | 4.2979  | 21.2843 | 8.0075 | C       | 4.2833  | 21.2719 | 8.0170 |
| C | 4.9845  | 22.4970 | 8.0045 | C       | 5.0213  | 22.4941 | 8.0074 | C       | 5.0056  | 22.4811 | 8.0200 |
| C | 6.3545  | 22.4974 | 8.0038 | C       | 6.3917  | 22.4943 | 8.0073 | C       | 6.3769  | 22.4809 | 8.0196 |
| C | 7.0798  | 21.2872 | 8.0059 | C       | 7.1152  | 21.2853 | 8.0070 | C       | 7.0988  | 21.2718 | 8.0174 |
| C | -0.0080 | 18.8184 | 8.0028 | C       | 0.0236  | 18.8151 | 8.0082 | C       | 0.0087  | 18.8018 | 8.0134 |
| C | 0.6963  | 20.0574 | 8.0069 | C       | 0.7314  | 20.0563 | 8.0072 | C       | 0.7160  | 20.0436 | 8.0149 |
| C | 2.1257  | 20.0590 | 8.0090 | C       | 2.1605  | 20.0552 | 8.0075 | C       | 2.1449  | 20.0435 | 8.0148 |
| C | 2.8333  | 18.8176 | 8.0061 | C       | 2.8645  | 18.8159 | 8.0076 | C       | 2.8497  | 18.8014 | 8.0135 |
| C | 4.2519  | 18.8178 | 8.0029 | C       | 4.2833  | 18.8149 | 8.0075 | C       | 4.2682  | 18.8016 | 8.0132 |
| C | 4.9568  | 20.0575 | 8.0055 | C       | 4.9909  | 20.0559 | 8.0074 | C       | 4.9757  | 20.0431 | 8.0147 |



|   |        |         |        |   |         |         |        |   |        |         |        |
|---|--------|---------|--------|---|---------|---------|--------|---|--------|---------|--------|
| C | 6.3862 | 20.0585 | 8.0040 | C | 6.4196  | 20.0558 | 8.0071 | C | 6.4045 | 20.0433 | 8.0152 |
| C | 7.0937 | 18.8177 | 7.9998 | C | 7.1242  | 18.8160 | 8.0081 | C | 7.1100 | 18.8016 | 8.0135 |
| C | 0.0009 | 16.3560 | 7.9962 | C | 0.0217  | 16.3545 | 8.0134 | C | 0.0101 | 16.3422 | 8.0101 |
| C | 0.6985 | 17.5818 | 8.0002 | C | 0.7253  | 17.5833 | 8.0099 | C | 0.7100 | 17.5684 | 8.0118 |
| C | 2.1309 | 17.5844 | 8.0015 | C | 2.1587  | 17.5811 | 8.0081 | C | 2.1462 | 17.5684 | 8.0117 |
| C | 2.8341 | 16.3547 | 7.9977 | C | 2.8551  | 16.3547 | 8.0072 | C | 2.8431 | 16.3417 | 8.0099 |
| C | 4.2614 | 16.3535 | 7.9986 | C | 4.2829  | 16.3513 | 8.0074 | C | 4.2700 | 16.3405 | 8.0100 |
| C | 4.9596 | 17.5825 | 7.9981 | C | 4.9853  | 17.5828 | 8.0082 | C | 4.9702 | 17.5682 | 8.0117 |
| C | 6.3898 | 17.5842 | 7.9978 | C | 6.4170  | 17.5825 | 8.0100 | C | 6.4050 | 17.5687 | 8.0119 |
| C | 7.0920 | 16.3517 | 7.9980 | C | 7.1153  | 16.3547 | 8.0134 | C | 7.1029 | 16.3410 | 8.0104 |
| C | 0.0085 | 13.8870 | 7.9912 | C | 0.0166  | 13.8858 | 8.0161 | C | 0.0114 | 13.8716 | 8.0100 |
| C | 0.7085 | 15.1158 | 7.9944 | C | 0.7238  | 15.1166 | 8.0143 | C | 0.7140 | 15.1006 | 8.0098 |
| C | 2.1321 | 15.1184 | 7.9952 | C | 2.1475  | 15.1138 | 8.0092 | C | 2.1367 | 15.1006 | 8.0098 |
| C | 2.8408 | 13.8856 | 8.0023 | C | 2.8452  | 13.8847 | 8.0061 | C | 2.8366 | 13.8712 | 8.0098 |
| C | 4.2675 | 13.8814 | 8.0100 | C | 4.2790  | 13.8781 | 8.0020 | C | 4.2724 | 13.8663 | 8.0096 |
| C | 4.9690 | 15.1130 | 8.0028 | C | 4.9841  | 15.1164 | 8.0079 | C | 4.9754 | 15.1006 | 8.0092 |
| C | 6.3905 | 15.1172 | 8.0000 | C | 6.4072  | 15.1142 | 8.0129 | C | 6.3949 | 15.1012 | 8.0092 |
| C | 7.0970 | 13.8754 | 7.9919 | C | 7.1077  | 13.8854 | 8.0132 | C | 7.0957 | 13.8668 | 8.0097 |
| C | 0.0178 | 11.4241 | 7.9567 | C | 0.0076  | 11.4137 | 7.9973 | C | 0.0019 | 11.4047 | 8.0171 |
| C | 0.7167 | 12.6565 | 7.9914 | C | 0.7165  | 12.6552 | 8.0141 | C | 0.7106 | 12.6434 | 8.0111 |
| C | 2.1400 | 12.6573 | 8.0126 | C | 2.1376  | 12.6538 | 8.0100 | C | 2.1348 | 12.6435 | 8.0121 |
| C | 2.8480 | 11.4184 | 8.0850 | C | 2.8392  | 11.4167 | 8.0084 | C | 2.8413 | 11.4045 | 8.0270 |
| C | 4.2767 | 11.4152 | 8.0583 | C | 4.2627  | 11.4121 | 7.9865 | C | 4.2623 | 11.3960 | 8.0278 |
| C | 4.9708 | 12.6387 | 8.0132 | C | 4.9735  | 12.6538 | 7.9910 | C | 4.9703 | 12.6397 | 8.0134 |
| C | 6.4036 | 12.6498 | 7.9813 | C | 6.4034  | 12.6459 | 7.9978 | C | 6.3955 | 12.6404 | 8.0138 |
| C | 7.1128 | 11.4073 | 7.9314 | C | 7.0997  | 11.4204 | 7.9764 | C | 7.1008 | 11.3961 | 8.0207 |
| C | 0.0391 | 8.9611  | 7.8533 | C | -0.0048 | 8.9331  | 7.9061 | C | 0.0091 | 8.9418  | 8.0601 |
| C | 0.7395 | 10.1988 | 7.9964 | C | 0.7067  | 10.1938 | 7.9971 | C | 0.7078 | 10.1785 | 8.0385 |
| C | 2.1364 | 10.2099 | 8.1484 | C | 2.1298  | 10.1864 | 8.0273 | C | 2.1339 | 10.1785 | 8.0524 |
| C | 2.8464 | 8.9300  | 8.4849 | C | 2.8373  | 8.9576  | 8.0608 | C | 2.8306 | 8.9417  | 8.1044 |
| C | 4.2942 | 8.9690  | 8.1434 | C | 4.2145  | 8.9804  | 8.0179 | C | 4.2317 | 8.9637  | 8.1098 |
| C | 4.9786 | 10.1418 | 8.0044 | C | 4.9445  | 10.1781 | 7.9626 | C | 4.9488 | 10.1543 | 8.0555 |
| C | 6.4340 | 10.1671 | 7.8756 | C | 6.3986  | 10.1670 | 7.9111 | C | 6.4117 | 10.1550 | 8.0365 |
| C | 7.1785 | 8.9790  | 7.7644 | C | 7.0979  | 8.9864  | 7.8177 | C | 7.1281 | 8.9633  | 8.0441 |
| H | 2.8237 | 8.8697  | 9.6085 | H | 2.2752  | 7.2488  | 9.2166 | H | 4.7487 | 8.0065  | 8.1555 |
| H | 4.8086 | 8.0084  | 8.1313 | H | 4.7382  | 8.0252  | 8.0496 | H | 6.6109 | 8.0051  | 8.0494 |
| H | 6.6689 | 8.0251  | 7.6262 | H | 6.5775  | 8.0357  | 7.7178 | H | 0.2285 | 23.4372 | 8.0311 |
| H | 0.2044 | 23.4529 | 8.0006 | H | 0.2426  | 23.4489 | 8.0062 | H | 2.6377 | 23.4355 | 8.0305 |
| H | 2.6135 | 23.4532 | 7.9988 | H | 2.6506  | 23.4502 | 8.0059 | H | 4.4876 | 23.4368 | 8.0244 |
| H | 4.4647 | 23.4519 | 8.0004 | H | 4.5016  | 23.4487 | 8.0068 | H | 6.8967 | 23.4356 | 8.0252 |
| H | 6.8736 | 23.4521 | 8.0020 | H | 6.9098  | 23.4500 | 8.0071 | H | 0.1719 | 6.7767  | 8.1304 |
| H | 0.2607 | 6.8161  | 7.4939 | H | 0.0784  | 6.8027  | 7.8759 | C | 0.7366 | 7.7112  | 8.1104 |
| C | 0.7976 | 7.7276  | 7.7666 | C | 0.6542  | 7.7279  | 7.9460 | C | 2.1012 | 7.7109  | 8.1356 |
| C | 2.1161 | 7.6958  | 8.0285 | C | 2.1135  | 7.6410  | 8.1884 | H | 2.6631 | 6.7754  | 8.1810 |
| H | 2.6814 | 6.7627  | 7.9836 | H | 2.5843  | 6.8796  | 7.5410 |   |        |         |        |
|   |        | B1      |        |   |         | B2      |        |   |        | B3      |        |
| C | 0.0388 | 21.2564 | 8.0037 | C | 0.0529  | 21.2891 | 8.0130 | C | 0.0404 | 21.2618 | 8.0142 |
| C | 0.7587 | 22.4646 | 8.0015 | C | 0.7768  | 22.4992 | 8.0125 | C | 0.7610 | 22.4694 | 8.0152 |
| C | 2.1310 | 22.4646 | 8.0013 | C | 2.1471  | 22.4990 | 8.0119 | C | 2.1335 | 22.4696 | 8.0153 |

|   |        |         |        |   |         |         |        |   |        |         |        |
|---|--------|---------|--------|---|---------|---------|--------|---|--------|---------|--------|
| C | 2.8514 | 21.2570 | 8.0044 | C | 2.8702  | 21.2901 | 8.0113 | C | 2.8533 | 21.2619 | 8.0144 |
| C | 4.2982 | 21.2568 | 8.0063 | C | 4.3135  | 21.2898 | 8.0122 | C | 4.3003 | 21.2614 | 8.0143 |
| C | 5.0179 | 22.4646 | 8.0051 | C | 5.0364  | 22.4998 | 8.0136 | C | 5.0198 | 22.4690 | 8.0159 |
| C | 6.3902 | 22.4647 | 8.0061 | C | 6.4067  | 22.4994 | 8.0132 | C | 6.3924 | 22.4692 | 8.0159 |
| C | 7.1119 | 21.2575 | 8.0060 | C | 7.1296  | 21.2901 | 8.0125 | C | 7.1132 | 21.2618 | 8.0141 |
| C | 0.0275 | 18.7854 | 8.0032 | C | 0.0392  | 18.8191 | 8.0085 | C | 0.0276 | 18.7905 | 8.0144 |
| C | 0.7323 | 20.0279 | 8.0035 | C | 0.7465  | 20.0610 | 8.0107 | C | 0.7332 | 20.0332 | 8.0141 |
| C | 2.1601 | 20.0282 | 8.0052 | C | 2.1755  | 20.0605 | 8.0092 | C | 2.1611 | 20.0333 | 8.0142 |
| C | 2.8665 | 18.7858 | 8.0057 | C | 2.8806  | 18.8208 | 8.0059 | C | 2.8669 | 18.7909 | 8.0144 |
| C | 4.2867 | 18.7867 | 8.0045 | C | 4.2996  | 18.8199 | 8.0036 | C | 4.2876 | 18.7901 | 8.0140 |
| C | 4.9916 | 20.0291 | 8.0058 | C | 5.0062  | 20.0611 | 8.0079 | C | 4.9928 | 20.0327 | 8.0137 |
| C | 6.4198 | 20.0290 | 8.0036 | C | 6.4349  | 20.0605 | 8.0092 | C | 6.4206 | 20.0328 | 8.0135 |
| C | 7.1270 | 18.7870 | 8.0011 | C | 7.1399  | 18.8203 | 8.0083 | C | 7.1267 | 18.7902 | 8.0139 |
| C | 0.0314 | 16.3260 | 7.9996 | C | 0.0392  | 16.3569 | 8.0011 | C | 0.0302 | 16.3319 | 8.0179 |
| C | 0.7297 | 17.5537 | 8.0026 | C | 0.7416  | 17.5867 | 8.0039 | C | 0.7289 | 17.5598 | 8.0158 |
| C | 2.1668 | 17.5541 | 8.0013 | C | 2.1754  | 17.5858 | 8.0030 | C | 2.1666 | 17.5602 | 8.0154 |
| C | 2.8658 | 16.3268 | 7.9904 | C | 2.8721  | 16.3592 | 7.9952 | C | 2.8654 | 16.3330 | 8.0154 |
| C | 4.2911 | 16.3284 | 7.9876 | C | 4.3001  | 16.3566 | 7.9944 | C | 4.2905 | 16.3307 | 8.0150 |
| C | 4.9888 | 17.5560 | 7.9971 | C | 5.0018  | 17.5876 | 8.0002 | C | 4.9885 | 17.5590 | 8.0144 |
| C | 6.4260 | 17.5563 | 7.9985 | C | 6.4344  | 17.5865 | 8.0041 | C | 6.4259 | 17.5590 | 8.0148 |
| C | 7.1260 | 16.3291 | 7.9980 | C | 7.1324  | 16.3586 | 8.0006 | C | 7.1249 | 16.3312 | 8.0175 |
| C | 0.0386 | 13.8547 | 8.0148 | C | 0.0344  | 13.8841 | 8.0130 | C | 0.0365 | 13.8625 | 8.0226 |
| C | 0.7376 | 15.0841 | 7.9998 | C | 0.7410  | 15.1173 | 8.0025 | C | 0.7359 | 15.0908 | 8.0194 |
| C | 2.1614 | 15.0849 | 7.9893 | C | 2.1646  | 15.1174 | 7.9942 | C | 2.1606 | 15.0923 | 8.0157 |
| C | 2.8614 | 13.8573 | 7.9888 | C | 2.8629  | 13.8882 | 7.9993 | C | 2.8606 | 13.8659 | 8.0134 |
| C | 4.2987 | 13.8595 | 7.9924 | C | 4.2967  | 13.8830 | 8.0024 | C | 4.2979 | 13.8595 | 8.0170 |
| C | 4.9974 | 15.0885 | 7.9868 | C | 5.0018  | 15.1205 | 7.9940 | C | 4.9960 | 15.0889 | 8.0169 |
| C | 6.4208 | 15.0891 | 7.9976 | C | 6.4245  | 15.1181 | 7.9978 | C | 6.4200 | 15.0892 | 8.0202 |
| C | 7.1217 | 13.8609 | 8.0159 | C | 7.1247  | 13.8881 | 8.0081 | C | 7.1191 | 13.8607 | 8.0253 |
| C | 0.0366 | 11.3772 | 8.0353 | C | 0.0287  | 11.4050 | 8.0361 | C | 0.0281 | 11.3910 | 7.9950 |
| C | 0.7404 | 12.6240 | 8.0258 | C | 0.7342  | 12.6526 | 8.0295 | C | 0.7372 | 12.6335 | 8.0139 |
| C | 2.1617 | 12.6276 | 8.0132 | C | 2.1561  | 12.6576 | 8.0315 | C | 2.1596 | 12.6382 | 8.0102 |
| C | 2.8666 | 11.3891 | 8.0995 | C | 2.8550  | 11.4258 | 8.1326 | C | 2.8700 | 11.4020 | 8.0218 |
| C | 4.2932 | 11.3950 | 8.1207 | C | 4.2800  | 11.4214 | 8.1422 | C | 4.2968 | 11.3820 | 8.0420 |
| C | 4.9994 | 12.6338 | 8.0335 | C | 4.9917  | 12.6588 | 8.0400 | C | 4.9985 | 12.6288 | 8.0268 |
| C | 6.4225 | 12.6340 | 8.0432 | C | 6.4219  | 12.6511 | 8.0344 | C | 6.4187 | 12.6299 | 8.0306 |
| C | 7.1302 | 11.3943 | 8.0639 | C | 7.1205  | 11.4237 | 8.0592 | C | 7.1225 | 11.3867 | 8.0199 |
| C | 0.0000 | 8.9351  | 7.8162 | C | -0.0079 | 8.9298  | 7.8844 | C | 0.0354 | 8.9326  | 7.8572 |
| C | 0.7327 | 10.1407 | 8.0173 | C | 0.7321  | 10.1788 | 8.0577 | C | 0.7230 | 10.1682 | 7.9469 |
| C | 2.1738 | 10.1588 | 8.2009 | C | 2.1495  | 10.1950 | 8.2388 | C | 2.1609 | 10.1779 | 8.0177 |
| C | 2.8998 | 9.0039  | 8.5607 | C | 2.8711  | 9.0301  | 8.5773 | C | 2.9017 | 9.0139  | 8.1226 |
| C | 4.2796 | 9.0086  | 8.5729 | C | 4.2448  | 9.0334  | 8.6004 | C | 4.2574 | 8.9327  | 8.1625 |
| C | 4.9909 | 10.1767 | 8.2524 | C | 4.9682  | 10.1998 | 8.2831 | C | 4.9885 | 10.1472 | 8.0785 |
| C | 6.4328 | 10.1690 | 8.1053 | C | 6.4110  | 10.1789 | 8.1367 | C | 6.4416 | 10.1472 | 8.0218 |
| C | 7.1320 | 8.9740  | 7.9061 | C | 7.0856  | 8.9878  | 8.0096 | C | 7.1680 | 8.9476  | 7.9132 |
| H | 2.3695 | 8.0969  | 8.8388 | H | 2.3280  | 8.1254  | 8.8393 | H | 1.1027 | 5.6173  | 8.0583 |
| H | 4.8163 | 8.1012  | 8.8496 | H | 4.7739  | 8.1245  | 8.8843 | H | 4.7684 | 7.9758  | 8.2640 |
| H | 6.5792 | 8.0504  | 7.7373 | H | 6.5463  | 8.0444  | 7.9519 | H | 6.6468 | 7.9971  | 7.8155 |
| H | 0.2396 | 23.4193 | 7.9988 | H | 0.2583  | 23.4547 | 8.0078 | H | 0.2423 | 23.4247 | 8.0175 |

|   |         |         |        |   |        |         |        |   |         |         |        |
|---|---------|---------|--------|---|--------|---------|--------|---|---------|---------|--------|
| H | 2.6495  | 23.4195 | 7.9981 | H | 2.6656 | 23.4543 | 8.0087 | H | 2.6515  | 23.4252 | 8.0176 |
| H | 4.4983  | 23.4190 | 7.9970 | H | 4.5176 | 23.4549 | 8.0094 | H | 4.5013  | 23.4243 | 8.0189 |
| H | 6.9086  | 23.4197 | 7.9979 | H | 6.9251 | 23.4550 | 8.0089 | H | 6.9105  | 23.4248 | 8.0188 |
| H | 1.5127  | 7.7467  | 6.7591 | H | 0.8508 | 6.2192  | 6.1350 | H | 1.4516  | 7.6619  | 6.7812 |
| C | 0.6388  | 7.6555  | 7.4185 | C | 0.5058 | 7.7218  | 7.5594 | C | 0.7703  | 7.6735  | 7.6388 |
| C | 0.2309  | 6.4519  | 7.7729 | C | 0.8252 | 6.5123  | 7.1914 | C | 0.5714  | 6.5312  | 8.3244 |
| H | -0.5281 | 6.0012  | 8.4069 | H | 1.1084 | 5.7355  | 7.9125 | H | -0.0965 | 6.4912  | 9.1865 |
|   |         | B4      |        |   |        | B5      |        |   |         | B6      |        |
| C | 0.0088  | 21.2352 | 8.0143 | C | 0.0562 | 21.2706 | 8.0110 | C | 0.0276  | 21.2774 | 8.0121 |
| C | 0.7294  | 22.4437 | 8.0115 | C | 0.7759 | 22.4762 | 8.0113 | C | 0.7482  | 22.4852 | 8.0136 |
| C | 2.1017  | 22.4431 | 8.0133 | C | 2.1505 | 22.4761 | 8.0112 | C | 2.1206  | 22.4852 | 8.0135 |
| C | 2.8216  | 21.2350 | 8.0158 | C | 2.8690 | 21.2701 | 8.0110 | C | 2.8409  | 21.2773 | 8.0122 |
| C | 4.2685  | 21.2331 | 8.0167 | C | 4.3171 | 21.2679 | 8.0111 | C | 4.2876  | 21.2748 | 8.0120 |
| C | 4.9894  | 22.4410 | 8.0161 | C | 5.0355 | 22.4742 | 8.0113 | C | 5.0075  | 22.4825 | 8.0128 |
| C | 6.3619  | 22.4403 | 8.0138 | C | 6.4092 | 22.4742 | 8.0114 | C | 6.3797  | 22.4826 | 8.0129 |
| C | 7.0820  | 21.2324 | 8.0152 | C | 7.1280 | 21.2679 | 8.0111 | C | 7.1008  | 21.2751 | 8.0119 |
| C | -0.0055 | 18.7635 | 8.0217 | C | 0.0425 | 18.8001 | 8.0101 | C | 0.0149  | 18.8078 | 8.0097 |
| C | 0.7007  | 20.0066 | 8.0177 | C | 0.7485 | 20.0413 | 8.0106 | C | 0.7207  | 20.0495 | 8.0111 |
| C | 2.1290  | 20.0064 | 8.0157 | C | 2.1764 | 20.0412 | 8.0106 | C | 2.1488  | 20.0494 | 8.0113 |
| C | 2.8346  | 18.7636 | 8.0138 | C | 2.8814 | 18.7999 | 8.0102 | C | 2.8554  | 18.8079 | 8.0102 |
| C | 4.2551  | 18.7594 | 8.0142 | C | 4.3047 | 18.7946 | 8.0104 | C | 4.2757  | 18.8031 | 8.0102 |
| C | 4.9609  | 20.0031 | 8.0167 | C | 5.0087 | 20.0379 | 8.0110 | C | 4.9806  | 20.0459 | 8.0111 |
| C | 6.3891  | 20.0028 | 8.0190 | C | 6.4355 | 20.0380 | 8.0109 | C | 6.4083  | 20.0459 | 8.0108 |
| C | 7.0940  | 18.7591 | 8.0224 | C | 7.1391 | 18.7946 | 8.0103 | C | 7.1144  | 18.8032 | 8.0096 |
| C | -0.0045 | 16.3072 | 8.0168 | C | 0.0423 | 16.3450 | 8.0100 | C | 0.0180  | 16.3525 | 8.0064 |
| C | 0.6952  | 17.5336 | 8.0192 | C | 0.7429 | 17.5726 | 8.0096 | C | 0.7172  | 17.5789 | 8.0081 |
| C | 2.1330  | 17.5337 | 8.0147 | C | 2.1808 | 17.5725 | 8.0095 | C | 2.1548  | 17.5788 | 8.0084 |
| C | 2.8330  | 16.3074 | 8.0108 | C | 2.8804 | 16.3445 | 8.0092 | C | 2.8551  | 16.3526 | 8.0068 |
| C | 4.2582  | 16.2970 | 8.0108 | C | 4.3058 | 16.3310 | 8.0095 | C | 4.2804  | 16.3410 | 8.0074 |
| C | 4.9560  | 17.5260 | 8.0145 | C | 5.0028 | 17.5629 | 8.0097 | C | 4.9769  | 17.5702 | 8.0086 |
| C | 6.3929  | 17.5257 | 8.0193 | C | 6.4398 | 17.5631 | 8.0097 | C | 6.4141  | 17.5701 | 8.0083 |
| C | 7.0900  | 16.2967 | 8.0166 | C | 7.1365 | 16.3312 | 8.0102 | C | 7.1124  | 16.3412 | 8.0069 |
| C | 0.0004  | 13.8454 | 8.0057 | C | 0.0455 | 13.8873 | 8.0205 | C | 0.0246  | 13.8905 | 8.0100 |
| C | 0.7019  | 15.0712 | 8.0113 | C | 0.7477 | 15.1115 | 8.0122 | C | 0.7254  | 15.1165 | 8.0055 |
| C | 2.1264  | 15.0711 | 8.0096 | C | 2.1748 | 15.1110 | 8.0111 | C | 2.1497  | 15.1163 | 8.0056 |
| C | 2.8284  | 13.8453 | 8.0038 | C | 2.8760 | 13.8863 | 8.0172 | C | 2.8520  | 13.8906 | 8.0098 |
| C | 4.2660  | 13.8174 | 8.0013 | C | 4.3110 | 13.8529 | 8.0198 | C | 4.2896  | 13.8612 | 8.0144 |
| C | 4.9631  | 15.0500 | 8.0081 | C | 5.0062 | 15.0834 | 8.0129 | C | 4.9854  | 15.0935 | 8.0089 |
| C | 6.3855  | 15.0495 | 8.0102 | C | 6.4351 | 15.0838 | 8.0140 | C | 6.4087  | 15.0934 | 8.0088 |
| C | 7.0826  | 13.8169 | 8.0032 | C | 7.1302 | 13.8535 | 8.0234 | C | 7.1068  | 13.8615 | 8.0146 |
| C | -0.0297 | 11.3982 | 7.9611 | C | 0.0186 | 11.4437 | 8.0591 | C | -0.0044 | 11.4446 | 8.0499 |
| C | 0.6988  | 12.6262 | 7.9915 | C | 0.7467 | 12.6711 | 8.0322 | C | 0.7242  | 12.6724 | 8.0193 |
| C | 2.1299  | 12.6258 | 7.9909 | C | 2.1749 | 12.6699 | 8.0295 | C | 2.1547  | 12.6720 | 8.0191 |
| C | 2.8585  | 11.3977 | 7.9629 | C | 2.9019 | 11.4413 | 8.0536 | C | 2.8849  | 11.4446 | 8.0494 |
| C | 4.2799  | 11.3179 | 7.9588 | C | 4.3281 | 11.3539 | 8.0617 | C | 4.3064  | 11.3612 | 8.0618 |
| C | 4.9682  | 12.5770 | 7.9867 | C | 5.0099 | 12.6029 | 8.0384 | C | 4.9924  | 12.6203 | 8.0328 |
| C | 6.3807  | 12.5766 | 7.9862 | C | 6.4301 | 12.6036 | 8.0416 | C | 6.4054  | 12.6202 | 8.0331 |
| C | 7.0688  | 11.3175 | 7.9572 | C | 7.1122 | 11.3554 | 8.0677 | C | 7.0940  | 11.3617 | 8.0626 |
| C | 0.1658  | 8.9427  | 7.8837 | C | 0.2557 | 8.9707  | 8.1229 | C | 0.2053  | 8.9861  | 8.1525 |

|   |        |         |        |   |        |         |        |   |        |         |        |
|---|--------|---------|--------|---|--------|---------|--------|---|--------|---------|--------|
| C | 0.7036 | 10.2258 | 7.9254 | C | 0.7576 | 10.2904 | 8.0852 | C | 0.7303 | 10.2782 | 8.0899 |
| C | 2.1248 | 10.2252 | 7.9286 | C | 2.1625 | 10.2877 | 8.0828 | C | 2.1513 | 10.2779 | 8.0897 |
| C | 2.6657 | 8.9441  | 7.8843 | C | 2.6602 | 8.9647  | 8.1215 | C | 2.6764 | 8.9857  | 8.1513 |
| C | 4.0781 | 8.8516  | 7.8873 | C | 4.1064 | 8.8814  | 8.1274 | C | 4.0971 | 8.8944  | 8.1568 |
| C | 4.9168 | 10.0271 | 7.9214 | C | 4.9534 | 10.0414 | 8.0984 | C | 4.9405 | 10.0664 | 8.1112 |
| C | 6.4321 | 10.0265 | 7.9209 | C | 6.4851 | 10.0430 | 8.1006 | C | 6.4612 | 10.0668 | 8.1121 |
| C | 7.2721 | 8.8514  | 7.8861 | C | 7.3318 | 8.8845  | 8.1275 | C | 7.3048 | 8.8949  | 8.1596 |
| H | 1.8942 | 5.9966  | 8.8343 | H | 2.3588 | 6.1776  | 7.8488 | H | 4.5809 | 7.9160  | 8.2006 |
| H | 4.5632 | 7.8739  | 7.8620 | H | 4.5913 | 7.9020  | 8.1583 | H | 6.8203 | 7.9170  | 8.2062 |
| H | 6.7911 | 7.8715  | 7.8611 | H | 6.8482 | 7.9042  | 8.1530 | H | 0.2297 | 23.4406 | 8.0158 |
| H | 0.2119 | 23.3994 | 8.0111 | H | 0.2588 | 23.4324 | 8.0124 | H | 2.6384 | 23.4409 | 8.0154 |
| H | 2.6221 | 23.3972 | 8.0135 | H | 2.6684 | 23.4318 | 8.0120 | H | 4.4887 | 23.4377 | 8.0144 |
| H | 4.4719 | 23.3968 | 8.0158 | H | 4.5177 | 23.4298 | 8.0117 | H | 6.8977 | 23.4383 | 8.0147 |
| H | 6.8827 | 23.3941 | 8.0135 | H | 6.9277 | 23.4295 | 8.0121 | H | 0.5109 | 6.1698  | 8.3808 |
| H | 1.4198 | 7.4274  | 6.8785 | H | 0.5859 | 6.2005  | 7.6709 | C | 1.4404 | 8.0768  | 8.2115 |
| C | 1.4029 | 7.9566  | 7.8470 | C | 1.4544 | 8.1107  | 8.1465 | C | 1.4409 | 6.7369  | 8.3278 |
| C | 1.4228 | 6.9712  | 8.9576 | C | 1.4315 | 6.6232  | 8.2344 | H | 2.3721 | 6.1714  | 8.3781 |
| H | 1.1338 | 7.2851  | 9.9603 | H | 1.3156 | 6.2838  | 9.2794 |   |        |         |        |
|   |        | C1      |        |   |        | C2      |        |   |        | C3      |        |
| C | 0.0689 | 21.2549 | 8.0091 | C | 0.0310 | 21.2560 | 8.0131 | C | 0.0660 | 21.2454 | 8.0147 |
| C | 0.7896 | 22.4630 | 8.0135 | C | 0.7548 | 22.4669 | 8.0154 | C | 0.7865 | 22.4534 | 8.0175 |
| C | 2.1619 | 22.4632 | 8.0144 | C | 2.1238 | 22.4666 | 8.0157 | C | 2.1590 | 22.4536 | 8.0181 |
| C | 2.8824 | 21.2552 | 8.0105 | C | 2.8486 | 21.2551 | 8.0135 | C | 2.8794 | 21.2458 | 8.0149 |
| C | 4.3290 | 21.2556 | 8.0113 | C | 4.2907 | 21.2563 | 8.0133 | C | 4.3263 | 21.2462 | 8.0151 |
| C | 5.0498 | 22.4633 | 8.0154 | C | 5.0139 | 22.4668 | 8.0152 | C | 5.0464 | 22.4542 | 8.0190 |
| C | 6.4218 | 22.4637 | 8.0155 | C | 6.3838 | 22.4666 | 8.0148 | C | 6.4187 | 22.4542 | 8.0185 |
| C | 7.1423 | 21.2557 | 8.0105 | C | 7.1094 | 21.2558 | 8.0127 | C | 7.1389 | 21.2462 | 8.0150 |
| C | 0.0558 | 18.7831 | 8.0029 | C | 0.0223 | 18.7852 | 8.0111 | C | 0.0528 | 18.7732 | 8.0114 |
| C | 0.7617 | 20.0260 | 8.0055 | C | 0.7265 | 20.0253 | 8.0122 | C | 0.7586 | 20.0164 | 8.0128 |
| C | 2.1898 | 20.0264 | 8.0058 | C | 2.1562 | 20.0263 | 8.0121 | C | 2.1868 | 20.0166 | 8.0124 |
| C | 2.8958 | 18.7836 | 8.0015 | C | 2.8635 | 18.7842 | 8.0098 | C | 2.8927 | 18.7738 | 8.0099 |
| C | 4.3161 | 18.7844 | 8.0019 | C | 4.2822 | 18.7859 | 8.0093 | C | 4.3133 | 18.7744 | 8.0098 |
| C | 5.0216 | 20.0270 | 8.0071 | C | 4.9864 | 20.0263 | 8.0112 | C | 5.0186 | 20.0174 | 8.0125 |
| C | 6.4497 | 20.0272 | 8.0063 | C | 6.4159 | 20.0268 | 8.0116 | C | 6.4466 | 20.0173 | 8.0129 |
| C | 7.1554 | 18.7846 | 8.0026 | C | 7.1236 | 18.7851 | 8.0109 | C | 7.1521 | 18.7743 | 8.0113 |
| C | 0.0582 | 16.3230 | 8.0092 | C | 0.0324 | 16.3202 | 8.0078 | C | 0.0551 | 16.3133 | 8.0143 |
| C | 0.7571 | 17.5510 | 8.0015 | C | 0.7291 | 17.5472 | 8.0091 | C | 0.7539 | 17.5416 | 8.0099 |
| C | 2.1944 | 17.5515 | 7.9984 | C | 2.1614 | 17.5499 | 8.0081 | C | 2.1914 | 17.5422 | 8.0083 |
| C | 2.8930 | 16.3239 | 7.9959 | C | 2.8648 | 16.3204 | 8.0046 | C | 2.8899 | 16.3148 | 8.0061 |
| C | 4.3187 | 16.3251 | 7.9963 | C | 4.2918 | 16.3220 | 8.0067 | C | 4.3154 | 16.3157 | 8.0058 |
| C | 5.0172 | 17.5530 | 7.9989 | C | 4.9896 | 17.5504 | 8.0085 | C | 5.0141 | 17.5433 | 8.0078 |
| C | 6.4542 | 17.5531 | 8.0019 | C | 6.4199 | 17.5517 | 8.0094 | C | 6.4513 | 17.5433 | 8.0096 |
| C | 7.1527 | 16.3255 | 8.0105 | C | 7.1232 | 16.3194 | 8.0091 | C | 7.1499 | 16.3158 | 8.0142 |
| C | 0.0643 | 13.8515 | 8.0673 | C | 0.0424 | 13.8466 | 8.0072 | C | 0.0610 | 13.8409 | 8.0572 |
| C | 0.7637 | 15.0807 | 8.0223 | C | 0.7410 | 15.0782 | 8.0041 | C | 0.7602 | 15.0708 | 8.0245 |
| C | 2.1873 | 15.0820 | 8.0060 | C | 2.1641 | 15.0827 | 8.0001 | C | 2.1841 | 15.0730 | 8.0127 |
| C | 2.8867 | 13.8535 | 8.0197 | C | 2.8729 | 13.8501 | 8.0063 | C | 2.8829 | 13.8451 | 8.0226 |
| C | 4.3244 | 13.8557 | 8.0306 | C | 4.2993 | 13.8522 | 8.0141 | C | 4.3210 | 13.8472 | 8.0247 |
| C | 5.0243 | 15.0849 | 8.0112 | C | 5.0002 | 15.0828 | 8.0079 | C | 5.0208 | 15.0756 | 8.0132 |

|   |         |         |         |   |        |         |         |   |         |         |         |
|---|---------|---------|---------|---|--------|---------|---------|---|---------|---------|---------|
| C | 6.4475  | 15.0853 | 8.0288  | C | 6.4223 | 15.0864 | 8.0102  | C | 6.4447  | 15.0758 | 8.0247  |
| C | 7.1476  | 13.8574 | 8.0751  | C | 7.1313 | 13.8460 | 8.0139  | C | 7.1443  | 13.8481 | 8.0575  |
| C | 0.0592  | 11.3741 | 8.1196  | C | 0.0589 | 11.3701 | 7.9913  | C | 0.0575  | 11.3588 | 8.1149  |
| C | 0.7646  | 12.6205 | 8.0931  | C | 0.7519 | 12.6118 | 8.0060  | C | 0.7609  | 12.6084 | 8.0867  |
| C | 2.1859  | 12.6244 | 8.0625  | C | 2.1725 | 12.6196 | 8.0213  | C | 2.1815  | 12.6156 | 8.0652  |
| C | 2.8902  | 11.3857 | 8.1567  | C | 2.8748 | 11.3783 | 8.1070  | C | 2.8851  | 11.3771 | 8.1493  |
| C | 4.3166  | 11.3919 | 8.1935  | C | 4.3042 | 11.3942 | 8.1134  | C | 4.3116  | 11.3833 | 8.1568  |
| C | 5.0243  | 12.6307 | 8.1013  | C | 5.0029 | 12.6120 | 8.0439  | C | 5.0208  | 12.6209 | 8.0734  |
| C | 6.4477  | 12.6310 | 8.1207  | C | 6.4400 | 12.6231 | 8.0324  | C | 6.4445  | 12.6209 | 8.0910  |
| C | 7.1541  | 11.3910 | 8.1531  | C | 7.1554 | 11.3845 | 8.0212  | C | 7.1509  | 11.3808 | 8.1212  |
| C | 0.0207  | 8.9320  | 7.8820  | C | 0.0262 | 8.9034  | 7.8689  | C | 0.0141  | 8.9061  | 8.0020  |
| C | 0.7530  | 10.1369 | 8.0913  | C | 0.7753 | 10.1253 | 8.0025  | C | 0.7527  | 10.1219 | 8.1370  |
| C | 2.1947  | 10.1569 | 8.2677  | C | 2.1795 | 10.1553 | 8.1659  | C | 2.1954  | 10.1481 | 8.2754  |
| C | 2.9172  | 9.0043  | 8.6410  | C | 2.9022 | 8.8904  | 8.4983  | C | 2.9238  | 8.9897  | 8.6014  |
| C | 4.2980  | 9.0083  | 8.6648  | C | 4.3659 | 8.9888  | 8.5036  | C | 4.2998  | 8.9937  | 8.5947  |
| C | 5.0131  | 10.1746 | 8.3455  | C | 5.0218 | 10.1419 | 8.2108  | C | 5.0070  | 10.1659 | 8.2869  |
| C | 6.4570  | 10.1643 | 8.2048  | C | 6.4622 | 10.1592 | 8.0463  | C | 6.4482  | 10.1592 | 8.1594  |
| C | 7.1525  | 8.9703  | 7.9970  | C | 7.1589 | 8.9646  | 7.8830  | C | 7.1407  | 8.9568  | 8.0318  |
| H | 2.3811  | 8.1030  | 8.9298  | H | 2.5282 | 8.4920  | 9.4627  | H | 2.4005  | 8.0775  | 8.8666  |
| H | 4.8341  | 8.1025  | 8.9475  | H | 4.9173 | 8.0748  | 8.7203  | H | 4.8341  | 8.0808  | 8.8529  |
| H | 6.6030  | 8.0422  | 7.8374  | H | 6.6169 | 8.0304  | 7.7523  | H | 6.5985  | 8.0190  | 7.9326  |
| H | 0.2717  | 23.4185 | 8.0211  | H | 0.2347 | 23.4216 | 8.0202  | H | 0.2677  | 23.4086 | 8.0221  |
| H | 2.6807  | 23.4182 | 8.0211  | H | 2.6421 | 23.4218 | 8.0203  | H | 2.6776  | 23.4088 | 8.0240  |
| H | 4.5320  | 23.4188 | 8.0200  | H | 4.4947 | 23.4218 | 8.0186  | H | 4.5279  | 23.4095 | 8.0255  |
| H | 6.9405  | 23.4187 | 8.0201  | H | 6.9014 | 23.4222 | 8.0183  | H | 6.9373  | 23.4093 | 8.0239  |
| H | 1.5908  | 7.7992  | 6.8613  | H | 2.6261 | 8.0911  | 7.7890  | C | 0.5498  | 7.6013  | 7.7977  |
| C | 0.6466  | 7.6792  | 7.4195  | C | 0.5298 | 7.5839  | 7.6804  | C | 0.8396  | 6.4347  | 7.6149  |
| C | 0.1648  | 6.4567  | 7.5446  | C | 0.7603 | 6.3976  | 7.5328  | H | 1.1446  | 5.4197  | 7.4701  |
| H | 0.4367  | 5.4494  | 7.2449  | H | 1.0335 | 5.3712  | 7.4084  |   |         |         |         |
|   | Z0      |         |         |   | Z1     |         |         |   | Z2      |         |         |
| C | -0.0009 | -5.7352 | 0.0000  | C | 0.0184 | -5.7358 | 0.1707  | C | -0.0108 | -5.7572 | -0.0071 |
| C | 1.2293  | -5.0519 | 0.0000  | C | 1.2483 | -5.0533 | 0.1383  | C | 1.2197  | -5.0751 | -0.0108 |
| C | 2.4590  | -5.7357 | 0.0002  | C | 2.4781 | -5.7358 | 0.1703  | C | 2.4500  | -5.7579 | -0.0079 |
| C | 3.6888  | -5.0519 | 0.0002  | C | 3.7080 | -5.0529 | 0.1375  | C | 3.6794  | -5.0740 | -0.0091 |
| C | 4.9192  | -5.7350 | 0.0003  | C | 4.9384 | -5.7352 | 0.1702  | C | 4.9085  | -5.7583 | -0.0080 |
| C | 6.1495  | -5.0519 | 0.0002  | C | 6.1683 | -5.0529 | 0.1380  | C | 6.1389  | -5.0763 | -0.0085 |
| C | 7.3793  | -5.7357 | 0.0002  | C | 7.3981 | -5.7357 | 0.1704  | C | 7.3691  | -5.7585 | -0.0079 |
| C | 8.6090  | -5.0519 | 0.0000  | C | 8.6282 | -5.0532 | 0.1387  | C | 8.5983  | -5.0749 | -0.0096 |
| C | 1.2293  | -3.6114 | 0.0000  | C | 1.2479 | -3.6149 | 0.0722  | C | 1.2184  | -3.6353 | -0.0139 |
| C | 2.4592  | -2.9045 | 0.0000  | C | 2.4772 | -2.9086 | 0.0429  | C | 2.4485  | -2.9277 | -0.0102 |
| C | 3.6888  | -3.6116 | 0.0001  | C | 3.7075 | -3.6144 | 0.0707  | C | 3.6790  | -3.6338 | -0.0073 |
| C | 4.9192  | -2.9049 | 0.0001  | C | 4.9378 | -2.9086 | 0.0416  | C | 4.9088  | -2.9281 | 0.0017  |
| C | 6.1495  | -3.6116 | 0.0001  | C | 6.1681 | -3.6146 | 0.0710  | C | 6.1378  | -3.6367 | -0.0038 |
| C | 7.3791  | -2.9045 | 0.0000  | C | 7.3979 | -2.9089 | 0.0430  | C | 7.3662  | -2.9295 | -0.0005 |
| C | 8.6090  | -3.6114 | 0.0000  | C | 8.6280 | -3.6147 | 0.0727  | C | 8.5965  | -3.6355 | -0.0091 |
| C | -0.0009 | -2.9044 | -0.0001 | C | 0.0181 | -2.9086 | 0.0442  | C | -0.0126 | -2.9299 | -0.0095 |
| C | -0.0009 | -1.4727 | -0.0001 | C | 0.0178 | -1.4781 | -0.0061 | C | -0.0135 | -1.4992 | -0.0038 |
| C | 1.2294  | -0.7638 | 0.0000  | C | 1.2469 | -0.7689 | -0.0243 | C | 1.2176  | -0.7900 | -0.0167 |
| C | 2.4591  | -1.4729 | 0.0000  | C | 2.4762 | -1.4782 | -0.0061 | C | 2.4489  | -1.4978 | -0.0094 |

|   |         |         |         |   |         |         |         |   |         |         |         |
|---|---------|---------|---------|---|---------|---------|---------|---|---------|---------|---------|
| C | 3.6892  | -0.7640 | 0.0000  | C | 3.7062  | -0.7705 | -0.0250 | C | 3.6800  | -0.7887 | 0.0056  |
| C | 4.9191  | -1.4730 | 0.0000  | C | 4.9374  | -1.4781 | -0.0079 | C | 4.9089  | -1.4962 | 0.0165  |
| C | 6.1491  | -0.7640 | 0.0000  | C | 6.1683  | -0.7710 | -0.0269 | C | 6.1372  | -0.7838 | 0.0303  |
| C | 7.3792  | -1.4728 | 0.0000  | C | 7.3982  | -1.4787 | -0.0079 | C | 7.3647  | -1.4980 | 0.0180  |
| C | 8.6089  | -0.7638 | 0.0000  | C | 8.6279  | -0.7695 | -0.0268 | C | 8.5942  | -0.7923 | 0.0156  |
| C | 1.2294  | 0.6668  | 0.0001  | C | 1.2460  | 0.6613  | -0.0472 | C | 1.2185  | 0.6373  | -0.0359 |
| C | 2.4595  | 1.3748  | 0.0001  | C | 2.4747  | 1.3699  | -0.0507 | C | 2.4548  | 1.3455  | -0.0525 |
| C | 3.6894  | 0.6664  | 0.0000  | C | 3.7051  | 0.6588  | -0.0465 | C | 3.6832  | 0.6402  | -0.0041 |
| C | 4.9191  | 1.3759  | -0.0001 | C | 4.9374  | 1.3627  | -0.0530 | C | 4.9068  | 1.3608  | 0.0269  |
| C | 6.1489  | 0.6664  | 0.0000  | C | 6.1693  | 0.6580  | -0.0502 | C | 6.1374  | 0.6494  | 0.0441  |
| C | 7.3788  | 1.3748  | 0.0001  | C | 7.3990  | 1.3687  | -0.0580 | C | 7.3687  | 1.3570  | 0.0483  |
| C | 8.6089  | 0.6668  | 0.0001  | C | 8.6285  | 0.6608  | -0.0521 | C | 8.5922  | 0.6353  | 0.0257  |
| C | -0.0009 | 1.3762  | 0.0001  | C | 0.0174  | 1.3726  | -0.0558 | C | -0.0188 | 1.3379  | -0.0103 |
| C | -0.0009 | 2.8087  | 0.0000  | C | 0.0171  | 2.8058  | -0.0606 | C | -0.0255 | 2.7603  | -0.0260 |
| C | 1.2326  | 3.5104  | -0.0002 | C | 1.2444  | 3.5170  | -0.0482 | C | 1.2086  | 3.4387  | -0.1392 |
| C | 2.4615  | 2.8067  | 0.0000  | C | 2.4732  | 2.8017  | -0.0497 | C | 2.4583  | 2.7679  | -0.1107 |
| C | 3.6901  | 3.5160  | -0.0004 | C | 3.7081  | 3.4974  | -0.0449 | C | 3.6759  | 3.5121  | -0.0490 |
| C | 4.9191  | 2.8081  | -0.0004 | C | 4.9370  | 2.7906  | -0.0526 | C | 4.9047  | 2.7970  | 0.0328  |
| C | 6.1482  | 3.5160  | -0.0004 | C | 6.1657  | 3.4983  | -0.0575 | C | 6.1401  | 3.5010  | 0.0856  |
| C | 7.3768  | 2.8067  | 0.0000  | C | 7.3993  | 2.8002  | -0.0642 | C | 7.3709  | 2.7915  | 0.0702  |
| C | 8.6057  | 3.5104  | -0.0002 | C | 8.6281  | 3.5143  | -0.0698 | C | 8.6017  | 3.5032  | 0.0513  |
| C | 1.2434  | 4.9609  | -0.0005 | C | 1.2510  | 4.9606  | -0.0364 | C | 1.1816  | 4.8291  | -0.1813 |
| C | 2.4664  | 5.6481  | 0.0008  | C | 2.4879  | 5.6223  | -0.0549 | C | 2.3924  | 5.6641  | -0.3881 |
| C | 3.6916  | 4.9565  | 0.0000  | C | 3.7113  | 4.9324  | -0.0443 | C | 3.6958  | 4.9588  | -0.0494 |
| C | 4.9191  | 5.6397  | 0.0003  | C | 4.9368  | 5.6186  | -0.0359 | C | 4.8951  | 5.6220  | 0.0670  |
| C | 6.1467  | 4.9565  | 0.0000  | C | 6.1626  | 4.9335  | -0.0434 | C | 6.1471  | 4.9364  | 0.1241  |
| C | 7.3719  | 5.6481  | 0.0008  | C | 7.3877  | 5.6223  | -0.0305 | C | 7.3770  | 5.6223  | 0.1578  |
| C | 8.5949  | 4.9610  | -0.0005 | C | 8.6223  | 4.9554  | -0.0632 | C | 8.6069  | 4.9525  | 0.1074  |
| C | -0.0009 | 5.5720  | -0.0018 | C | 0.0153  | 5.6711  | -0.0425 | C | 0.0554  | 5.5997  | 0.0477  |
| H | -0.0009 | -6.8280 | 0.0003  | H | 0.0183  | -6.8270 | 0.2235  | H | -0.0112 | -6.8494 | -0.0037 |
| H | 2.4590  | -6.8284 | 0.0003  | H | 2.4783  | -6.8269 | 0.2240  | H | 2.4492  | -6.8504 | -0.0034 |
| H | 4.9192  | -6.8276 | 0.0003  | H | 4.9384  | -6.8264 | 0.2235  | H | 4.9085  | -6.8508 | -0.0047 |
| H | 7.3794  | -6.8284 | 0.0003  | H | 7.3979  | -6.8269 | 0.2226  | H | 7.3692  | -6.8505 | -0.0060 |
| H | 2.4609  | 6.7392  | 0.0043  | H | 2.5112  | 6.7099  | -0.0998 | H | 2.4565  | 5.7698  | -1.4995 |
| H | 4.9191  | 6.7322  | 0.0010  | H | 4.9363  | 6.7112  | -0.0239 | H | 4.9102  | 6.7148  | 0.0665  |
| H | 7.3775  | 6.7391  | 0.0043  | H | 7.3595  | 6.7100  | 0.0321  | H | 7.3626  | 6.7146  | 0.1751  |
|   |         |         |         | H | -0.7210 | 7.5816  | -0.8085 | H | -0.1012 | 7.8449  | 0.3738  |
|   |         |         |         | C | -0.0353 | 7.1517  | -0.0627 | C | 0.5311  | 6.9798  | 0.1771  |
|   |         |         |         | C | 0.6132  | 7.9944  | 0.7175  | C | 1.8861  | 7.0334  | 0.0195  |
|   |         |         |         | H | 1.2893  | 7.9765  | 1.5688  | H | 2.4901  | 7.9385  | 0.0282  |
|   |         | Z3      |         |   | Z4      |         |         |   | X1      |         |         |
| C | -0.0062 | -5.7649 | -0.0477 | C | -0.0128 | -5.7585 | -0.0149 | C | 0.0269  | -5.7764 | 0.0797  |
| C | 1.2248  | -5.0830 | -0.0485 | C | 1.2177  | -5.0752 | -0.0187 | C | 1.2566  | -5.0934 | 0.0642  |
| C | 2.4546  | -5.7660 | -0.0529 | C | 2.4479  | -5.7588 | -0.0205 | C | 2.4864  | -5.7761 | 0.0801  |
| C | 3.6849  | -5.0826 | -0.0516 | C | 3.6774  | -5.0750 | -0.0137 | C | 3.7166  | -5.0930 | 0.0641  |
| C | 4.9145  | -5.7663 | -0.0513 | C | 4.9073  | -5.7587 | -0.0082 | C | 4.9467  | -5.7757 | 0.0797  |
| C | 6.1445  | -5.0834 | -0.0479 | C | 6.1377  | -5.0760 | 0.0032  | C | 6.1767  | -5.0930 | 0.0630  |
| C | 7.3744  | -5.7665 | -0.0473 | C | 7.3676  | -5.7594 | -0.0031 | C | 7.4063  | -5.7761 | 0.0792  |
| C | 8.6032  | -5.0827 | -0.0454 | C | 8.5971  | -5.0752 | -0.0020 | C | 8.6367  | -5.0937 | 0.0631  |

|   |         |         |         |   |         |         |         |   |         |         |         |
|---|---------|---------|---------|---|---------|---------|---------|---|---------|---------|---------|
| C | 1.2237  | -3.6429 | -0.0363 | C | 1.2176  | -3.6358 | -0.0158 | C | 1.2567  | -3.6539 | 0.0304  |
| C | 2.4533  | -2.9363 | -0.0257 | C | 2.4481  | -2.9286 | -0.0169 | C | 2.4863  | -2.9471 | 0.0121  |
| C | 3.6840  | -3.6423 | -0.0392 | C | 3.6778  | -3.6349 | -0.0099 | C | 3.7167  | -3.6533 | 0.0299  |
| C | 4.9146  | -2.9362 | -0.0262 | C | 4.9086  | -2.9282 | 0.0062  | C | 4.9472  | -2.9469 | 0.0107  |
| C | 6.1438  | -3.6435 | -0.0372 | C | 6.1375  | -3.6360 | 0.0145  | C | 6.1770  | -3.6536 | 0.0284  |
| C | 7.3728  | -2.9362 | -0.0257 | C | 7.3660  | -2.9281 | 0.0199  | C | 7.4072  | -2.9475 | 0.0097  |
| C | 8.6022  | -3.6428 | -0.0351 | C | 8.5966  | -3.6351 | 0.0086  | C | 8.6371  | -3.6540 | 0.0286  |
| C | -0.0073 | -2.9365 | -0.0237 | C | -0.0135 | -2.9289 | -0.0032 | C | 0.0272  | -2.9471 | 0.0114  |
| C | -0.0084 | -1.5061 | 0.0059  | C | -0.0146 | -1.4984 | -0.0045 | C | 0.0277  | -1.5159 | -0.0233 |
| C | 1.2228  | -0.7976 | 0.0257  | C | 1.2173  | -0.7894 | -0.0178 | C | 1.2569  | -0.8059 | -0.0368 |
| C | 2.4535  | -1.5057 | 0.0100  | C | 2.4490  | -1.4983 | -0.0165 | C | 2.4862  | -1.5161 | -0.0235 |
| C | 3.6861  | -0.7992 | 0.0276  | C | 3.6798  | -0.7903 | -0.0083 | C | 3.7164  | -0.8077 | -0.0374 |
| C | 4.9160  | -1.5046 | 0.0071  | C | 4.9098  | -1.4966 | 0.0076  | C | 4.9476  | -1.5157 | -0.0246 |
| C | 6.1446  | -0.7913 | 0.0216  | C | 6.1372  | -0.7822 | 0.0164  | C | 6.1789  | -0.8077 | -0.0384 |
| C | 7.3721  | -1.5045 | 0.0023  | C | 7.3645  | -1.4966 | 0.0197  | C | 7.4082  | -1.5164 | -0.0249 |
| C | 8.6004  | -0.7970 | 0.0195  | C | 8.5942  | -0.7905 | 0.0069  | C | 8.6380  | -0.8066 | -0.0368 |
| C | 1.2231  | 0.6306  | 0.0526  | C | 1.2171  | 0.6359  | -0.0255 | C | 1.2566  | 0.6249  | -0.0512 |
| C | 2.4599  | 1.3307  | 0.0629  | C | 2.4542  | 1.3410  | -0.0302 | C | 2.4860  | 1.3341  | -0.0555 |
| C | 3.6893  | 0.6280  | 0.0547  | C | 3.6818  | 0.6382  | -0.0149 | C | 3.7163  | 0.6221  | -0.0533 |
| C | 4.9140  | 1.3488  | 0.0592  | C | 4.9061  | 1.3620  | -0.0011 | C | 4.9491  | 1.3261  | -0.0559 |
| C | 6.1457  | 0.6419  | 0.0491  | C | 6.1369  | 0.6521  | 0.0126  | C | 6.1808  | 0.6220  | -0.0533 |
| C | 7.3758  | 1.3537  | 0.0526  | C | 7.3675  | 1.3618  | 0.0139  | C | 7.4107  | 1.3346  | -0.0530 |
| C | 8.5986  | 0.6325  | 0.0464  | C | 8.5917  | 0.6379  | 0.0019  | C | 8.6389  | 0.6243  | -0.0493 |
| C | -0.0127 | 1.3386  | 0.0551  | C | -0.0206 | 1.3407  | -0.0157 | C | 0.0276  | 1.3362  | -0.0490 |
| C | -0.0159 | 2.7640  | 0.0497  | C | -0.0273 | 2.7633  | -0.0122 | C | 0.0258  | 2.7696  | -0.0348 |
| C | 1.2293  | 3.4345  | 0.0493  | C | 1.2166  | 3.4442  | -0.0299 | C | 1.2533  | 3.4763  | -0.0361 |
| C | 2.4638  | 2.7546  | 0.0609  | C | 2.4605  | 2.7637  | -0.0364 | C | 2.4858  | 2.7667  | -0.0525 |
| C | 3.6796  | 3.4946  | 0.0463  | C | 3.6688  | 3.5093  | -0.0224 | C | 3.7241  | 3.4589  | -0.0494 |
| C | 4.9106  | 2.7838  | 0.0544  | C | 4.9038  | 2.7986  | -0.0010 | C | 4.9519  | 2.7543  | -0.0532 |
| C | 6.1413  | 3.4932  | 0.0354  | C | 6.1369  | 3.5021  | 0.0240  | C | 6.1791  | 3.4640  | -0.0447 |
| C | 7.3771  | 2.7907  | 0.0440  | C | 7.3695  | 2.7979  | 0.0230  | C | 7.4128  | 2.7678  | -0.0434 |
| C | 8.6055  | 3.5070  | 0.0276  | C | 8.6042  | 3.5082  | 0.0175  | C | 8.6405  | 3.4858  | -0.0181 |
| C | 1.2490  | 4.8347  | 0.0008  | C | 1.2164  | 4.8296  | -0.0173 | C | 1.2510  | 4.9250  | 0.0117  |
| C | 2.4016  | 5.5921  | -0.0316 | C | 2.3883  | 5.6280  | -0.0121 | C | 2.4965  | 5.5168  | -0.0017 |
| C | 3.6759  | 4.9450  | 0.0025  | C | 3.6609  | 4.9685  | -0.0082 | C | 3.7385  | 4.9035  | -0.0339 |
| C | 4.9062  | 5.6156  | -0.0177 | C | 4.9003  | 5.6292  | 0.0253  | C | 4.9575  | 5.5930  | -0.0372 |
| C | 6.1340  | 4.9292  | -0.0040 | C | 6.1367  | 4.9423  | 0.0376  | C | 6.1779  | 4.8985  | -0.0383 |
| C | 7.3784  | 5.6164  | -0.0375 | C | 7.3729  | 5.6288  | 0.0497  | C | 7.3999  | 5.5876  | -0.0152 |
| C | 8.5920  | 4.9569  | -0.0228 | C | 8.6115  | 4.9666  | 0.0319  | C | 8.6359  | 4.9293  | 0.0284  |
| C | 0.0475  | 5.6492  | -0.0541 | C | 0.0433  | 5.6259  | 0.0156  | C | 0.0301  | 5.6582  | 0.0923  |
| H | -0.0076 | -6.8572 | -0.0465 | H | -0.0127 | -6.8509 | -0.0197 | H | 0.0269  | -6.8685 | 0.1061  |
| H | 2.4530  | -6.8586 | -0.0462 | H | 2.4483  | -6.8512 | -0.0197 | H | 2.4866  | -6.8682 | 0.1056  |
| H | 4.9124  | -6.8591 | -0.0485 | H | 4.9071  | -6.8511 | -0.0144 | H | 4.9466  | -6.8678 | 0.1059  |
| H | 7.3739  | -6.8590 | -0.0498 | H | 7.3681  | -6.8516 | -0.0152 | H | 7.4059  | -6.8682 | 0.1063  |
| H | 2.3491  | 7.5299  | -1.0301 | H | 4.9158  | 6.7213  | 0.0416  | H | 2.0271  | 7.6629  | -0.2229 |
| H | 4.9194  | 6.7077  | -0.0466 | H | 7.3586  | 6.7211  | 0.0559  | H | 4.9544  | 6.6839  | -0.0167 |
| H | 7.3629  | 6.7083  | -0.0726 | H | -0.1034 | 7.8878  | 0.0457  | H | 7.3560  | 6.6750  | -0.0441 |
| H | -0.1817 | 7.8387  | -0.1962 | C | 0.5168  | 6.9935  | 0.0313  | H | -0.9295 | 7.5256  | 0.6038  |
| C | 0.4495  | 6.9541  | -0.1322 | C | 1.9110  | 6.9951  | 0.0171  | C | 0.0210  | 7.1005  | 0.2756  |

|   |        |         |         |   |         |         |         |   |         |         |         |
|---|--------|---------|---------|---|---------|---------|---------|---|---------|---------|---------|
| C | 1.9635 | 7.0336  | -0.1217 | H | 2.5285  | 7.8914  | 0.0277  | C | 1.0362  | 7.9753  | 0.1168  |
| H | 2.3300 | 7.6414  | 0.7255  |   |         |         |         | H | 0.8892  | 9.0363  | 0.3231  |
|   |        | Y1      |         |   |         | Y2      |         |   |         | Y3      |         |
| C | 0.0074 | -5.7489 | 0.1507  | C | -0.0005 | -5.7190 | 0.0284  | C | -0.0026 | -5.7468 | 0.1580  |
| C | 1.2378 | -5.0669 | 0.1222  | C | 1.2299  | -5.0361 | 0.0347  | C | 1.2278  | -5.0641 | 0.1433  |
| C | 2.4677 | -5.7493 | 0.1498  | C | 2.4596  | -5.7196 | 0.0297  | C | 2.4575  | -5.7474 | 0.1559  |
| C | 3.6975 | -5.0660 | 0.1248  | C | 3.6895  | -5.0354 | 0.0331  | C | 3.6873  | -5.0642 | 0.1395  |
| C | 4.9276 | -5.7486 | 0.1510  | C | 4.9195  | -5.7192 | 0.0295  | C | 4.9175  | -5.7469 | 0.1538  |
| C | 6.1576 | -5.0657 | 0.1257  | C | 6.1496  | -5.0355 | 0.0329  | C | 6.1478  | -5.0641 | 0.1398  |
| C | 7.3870 | -5.7492 | 0.1516  | C | 7.3795  | -5.7196 | 0.0296  | C | 7.3776  | -5.7474 | 0.1564  |
| C | 8.6169 | -5.0667 | 0.1231  | C | 8.6092  | -5.0361 | 0.0346  | C | 8.6072  | -5.0640 | 0.1437  |
| C | 1.2383 | -3.6283 | 0.0645  | C | 1.2298  | -3.5962 | 0.0381  | C | 1.2278  | -3.6247 | 0.1075  |
| C | 2.4674 | -2.9217 | 0.0389  | C | 2.4588  | -2.8887 | 0.0335  | C | 2.4575  | -2.9185 | 0.0838  |
| C | 3.6978 | -3.6270 | 0.0682  | C | 3.6894  | -3.5952 | 0.0353  | C | 3.6874  | -3.6248 | 0.1018  |
| C | 4.9285 | -2.9211 | 0.0406  | C | 4.9198  | -2.8883 | 0.0316  | C | 4.9177  | -2.9188 | 0.0794  |
| C | 6.1586 | -3.6269 | 0.0676  | C | 6.1500  | -3.5952 | 0.0350  | C | 6.1480  | -3.6247 | 0.1021  |
| C | 7.3887 | -2.9212 | 0.0379  | C | 7.3808  | -2.8888 | 0.0331  | C | 7.3780  | -2.9185 | 0.0842  |
| C | 8.6178 | -3.6280 | 0.0641  | C | 8.6096  | -3.5962 | 0.0379  | C | 8.6075  | -3.6246 | 0.1079  |
| C | 0.0082 | -2.9223 | 0.0378  | C | -0.0002 | -2.8886 | 0.0328  | C | -0.0023 | -2.9183 | 0.0886  |
| C | 0.0082 | -1.4916 | -0.0092 | C | 0.0001  | -1.4574 | 0.0082  | C | -0.0021 | -1.4876 | 0.0485  |
| C | 1.2370 | -0.7819 | -0.0287 | C | 1.2293  | -0.7466 | -0.0050 | C | 1.2279  | -0.7790 | 0.0269  |
| C | 2.4663 | -1.4916 | -0.0122 | C | 2.4579  | -1.4575 | 0.0153  | C | 2.4574  | -1.4881 | 0.0421  |
| C | 3.6963 | -0.7847 | -0.0333 | C | 3.6887  | -0.7502 | 0.0089  | C | 3.6873  | -0.7805 | 0.0157  |
| C | 4.9285 | -1.4911 | -0.0133 | C | 4.9202  | -1.4574 | 0.0196  | C | 4.9179  | -1.4883 | 0.0355  |
| C | 6.1600 | -0.7839 | -0.0329 | C | 6.1519  | -0.7501 | 0.0085  | C | 6.1487  | -0.7805 | 0.0159  |
| C | 7.3898 | -1.4910 | -0.0120 | C | 7.3823  | -1.4575 | 0.0149  | C | 7.3785  | -1.4880 | 0.0424  |
| C | 8.6193 | -0.7817 | -0.0283 | C | 8.6112  | -0.7466 | -0.0054 | C | 8.6081  | -0.7789 | 0.0271  |
| C | 1.2353 | 0.6487  | -0.0488 | C | 1.2292  | 0.6842  | -0.0334 | C | 1.2278  | 0.6505  | -0.0100 |
| C | 2.4642 | 1.3557  | -0.0545 | C | 2.4594  | 1.3897  | -0.0283 | C | 2.4575  | 1.3582  | -0.0321 |
| C | 3.6944 | 0.6436  | -0.0557 | C | 3.6886  | 0.6778  | -0.0089 | C | 3.6871  | 0.6482  | -0.0239 |
| C | 4.9272 | 1.3465  | -0.0616 | C | 4.9209  | 1.3812  | -0.0104 | C | 4.9183  | 1.3545  | -0.0415 |
| C | 6.1608 | 0.6447  | -0.0557 | C | 6.1530  | 0.6779  | -0.0097 | C | 6.1494  | 0.6483  | -0.0235 |
| C | 7.3908 | 1.3573  | -0.0551 | C | 7.3823  | 1.3901  | -0.0295 | C | 7.3792  | 1.3584  | -0.0315 |
| C | 8.6197 | 0.6491  | -0.0489 | C | 8.6121  | 0.6843  | -0.0340 | C | 8.6086  | 0.6506  | -0.0097 |
| C | 0.0073 | 1.3628  | -0.0499 | C | 0.0008  | 1.4002  | -0.0509 | C | -0.0018 | 1.3609  | -0.0224 |
| C | 0.0069 | 2.7971  | -0.0369 | C | 0.0011  | 2.8320  | -0.0748 | C | -0.0015 | 2.7925  | -0.0443 |
| C | 1.2354 | 3.5059  | -0.0282 | C | 1.2364  | 3.5390  | -0.0677 | C | 1.2287  | 3.5004  | -0.0535 |
| C | 2.4630 | 2.7874  | -0.0480 | C | 2.4608  | 2.8199  | -0.0341 | C | 2.4579  | 2.7891  | -0.0523 |
| C | 3.6987 | 3.4807  | -0.0492 | C | 3.6956  | 3.5167  | -0.0084 | C | 3.6896  | 3.4908  | -0.0647 |
| C | 4.9270 | 2.7728  | -0.0590 | C | 4.9214  | 2.8072  | -0.0080 | C | 4.9186  | 2.7835  | -0.0611 |
| C | 6.1552 | 3.4800  | -0.0492 | C | 6.1472  | 3.5172  | -0.0108 | C | 6.1477  | 3.4912  | -0.0640 |
| C | 7.3923 | 2.7897  | -0.0481 | C | 7.3818  | 2.8204  | -0.0363 | C | 7.3793  | 2.7895  | -0.0514 |
| C | 8.6196 | 3.5109  | -0.0272 | C | 8.6063  | 3.5397  | -0.0696 | C | 8.6087  | 3.5010  | -0.0527 |
| C | 1.2464 | 4.9474  | 0.0124  | C | 1.2683  | 4.9725  | -0.0905 | C | 1.2393  | 4.9381  | -0.0638 |
| C | 2.4796 | 5.6015  | 0.0038  | C | 2.4712  | 5.6358  | -0.0228 | C | 2.4653  | 5.6152  | -0.0719 |
| C | 3.7044 | 4.9146  | -0.0287 | C | 3.7040  | 4.9489  | 0.0136  | C | 3.6920  | 4.9278  | -0.0759 |
| C | 4.9275 | 5.6006  | -0.0215 | C | 4.9216  | 5.6344  | 0.0380  | C | 4.9188  | 5.6132  | -0.0879 |
| C | 6.1506 | 4.9125  | -0.0274 | C | 6.1394  | 4.9496  | 0.0094  | C | 6.1457  | 4.9284  | -0.0748 |
| C | 7.3722 | 5.6039  | 0.0072  | C | 7.3723  | 5.6371  | -0.0299 | C | 7.3726  | 5.6161  | -0.0700 |



|   |         |         |        |   |         |         |         |   |         |         |         |
|---|---------|---------|--------|---|---------|---------|---------|---|---------|---------|---------|
| C | 8.6138  | 4.9561  | 0.0145 | C | 8.5754  | 4.9738  | -0.0945 | C | 8.5987  | 4.9390  | -0.0628 |
| C | 0.0152  | 5.6816  | 0.0624 | C | 0.0023  | 5.7192  | -0.2129 | C | -0.0009 | 5.6490  | -0.0688 |
| H | 0.0083  | -6.8404 | 0.1951 | H | -0.0006 | -6.8112 | 0.0154  | H | -0.0028 | -6.8391 | 0.1758  |
| H | 2.4682  | -6.8410 | 0.1927 | H | 2.4588  | -6.8121 | 0.0198  | H | 2.4574  | -6.8397 | 0.1757  |
| H | 4.9282  | -6.8407 | 0.1886 | H | 4.9194  | -6.8121 | 0.0223  | H | 4.9175  | -6.8392 | 0.1745  |
| H | 7.3880  | -6.8408 | 0.1923 | H | 7.3800  | -6.8121 | 0.0197  | H | 7.3775  | -6.8397 | 0.1761  |
| H | 2.4916  | 6.6994  | 0.0294 | H | 2.4847  | 6.7272  | -0.0208 | H | 2.4674  | 6.7062  | -0.0723 |
| H | 4.9263  | 6.6928  | 0.0025 | H | 4.9215  | 6.7269  | 0.0538  | H | 4.9185  | 6.7053  | -0.1078 |
| H | 7.3099  | 6.6908  | 0.0315 | H | 7.3586  | 6.7286  | -0.0302 | H | 7.3707  | 6.7072  | -0.0698 |
| H | -1.0040 | 7.5871  | 0.2032 | H | 0.0415  | 8.6739  | -1.7574 | C | 0.0051  | 7.0608  | -0.0984 |
| C | -0.0045 | 7.1300  | 0.1722 | C | 0.0100  | 7.0231  | -0.4625 | C | 0.0245  | 8.2774  | -0.1396 |
| C | 0.9912  | 8.0096  | 0.2554 | C | 0.0318  | 8.2989  | -0.7279 | H | 0.0404  | 9.3458  | -0.1925 |
| H | 1.0533  | 9.0901  | 0.3559 | H | 0.0391  | 9.0503  | 0.0693  |   |         |         |         |

Table S5: Cartesian atomic coordinates (Angstrom) of the unit cell of acetylene and solid structures (i.e., transition states) with armchair and zigzag edges.

| A0+C2H2=A1 |         |         |        | A1=A2 |        |         |        | A2=A3 |        |         |        |
|------------|---------|---------|--------|-------|--------|---------|--------|-------|--------|---------|--------|
| C          | 0.0111  | 21.2589 | 8.0066 | C     | 0.0365 | 21.2713 | 8.0053 | C     | 0.0162 | 21.2847 | 8.006  |
| C          | 0.731   | 22.4666 | 8.0085 | C     | 0.7568 | 22.4785 | 8.0051 | C     | 0.7371 | 22.4916 | 8.0049 |
| C          | 2.1034  | 22.4665 | 8.0085 | C     | 2.1294 | 22.4789 | 8.0056 | C     | 2.1093 | 22.4931 | 8.005  |
| C          | 2.8234  | 21.2589 | 8.0066 | C     | 2.8492 | 21.2714 | 8.0061 | C     | 2.8301 | 21.2846 | 8.006  |
| C          | 4.2706  | 21.2588 | 8.0067 | C     | 4.2962 | 21.2714 | 8.0057 | C     | 4.2757 | 21.2836 | 8.0061 |
| C          | 4.991   | 22.4663 | 8.009  | C     | 5.0157 | 22.4788 | 8.0061 | C     | 4.9967 | 22.4904 | 8.0053 |
| C          | 6.3637  | 22.4662 | 8.0091 | C     | 6.3884 | 22.4792 | 8.0057 | C     | 6.3691 | 22.492  | 8.0052 |
| C          | 7.0839  | 21.2586 | 8.0066 | C     | 7.1094 | 21.2719 | 8.005  | C     | 7.0909 | 21.2843 | 8.0061 |
| C          | -0.0019 | 18.7871 | 8.0032 | C     | 0.0244 | 18.8003 | 8.0021 | C     | 0.005  | 18.8154 | 8.0056 |
| C          | 0.7034  | 20.03   | 8.0046 | C     | 0.7295 | 20.0426 | 8.0047 | C     | 0.709  | 20.0548 | 8.006  |
| C          | 2.1311  | 20.0301 | 8.0046 | C     | 2.1572 | 20.0428 | 8.0051 | C     | 2.1373 | 20.0557 | 8.006  |
| C          | 2.8364  | 18.7874 | 8.003  | C     | 2.8631 | 18.8008 | 8.0024 | C     | 2.843  | 18.8141 | 8.0052 |
| C          | 4.2574  | 18.7872 | 8.0027 | C     | 4.2839 | 18.8011 | 8.0016 | C     | 4.2646 | 18.8141 | 8.0055 |
| C          | 4.9634  | 20.0298 | 8.0044 | C     | 4.9891 | 20.0431 | 8.004  | C     | 4.9693 | 20.0542 | 8.0062 |
| C          | 6.3913  | 20.0298 | 8.0043 | C     | 6.4168 | 20.0432 | 8.0035 | C     | 6.3974 | 20.0549 | 8.0064 |
| C          | 7.0972  | 18.7871 | 8.003  | C     | 7.1233 | 18.8012 | 8.0013 | C     | 7.1038 | 18.8131 | 8.006  |
| C          | 0.0002  | 16.328  | 8.0126 | C     | 0.0278 | 16.341  | 8.0019 | C     | 0.0093 | 16.3549 | 8.0046 |
| C          | 0.6985  | 17.556  | 8.0045 | C     | 0.7258 | 17.5695 | 7.9998 | C     | 0.7074 | 17.5831 | 8.0046 |
| C          | 2.136   | 17.5565 | 8.0035 | C     | 2.1631 | 17.57   | 7.9992 | C     | 2.1423 | 17.5845 | 8.0042 |
| C          | 2.8344  | 16.3285 | 8.007  | C     | 2.8619 | 16.3424 | 7.9944 | C     | 2.8424 | 16.355  | 8.004  |
| C          | 4.2597  | 16.3285 | 8.0073 | C     | 4.2871 | 16.343  | 7.9937 | C     | 4.2684 | 16.3535 | 8.0043 |
| C          | 4.9585  | 17.5563 | 8.003  | C     | 4.9853 | 17.571  | 7.998  | C     | 4.9677 | 17.583  | 8.0049 |
| C          | 6.3962  | 17.5562 | 8.0042 | C     | 6.4227 | 17.5709 | 7.9991 | C     | 6.4024 | 17.583  | 8.0052 |
| C          | 7.095   | 16.3281 | 8.0126 | C     | 7.1224 | 16.3434 | 8.0024 | C     | 7.1025 | 16.3514 | 8.0045 |
| C          | 0.0058  | 13.8589 | 8.0704 | C     | 0.0351 | 13.8693 | 8.0422 | C     | 0.0164 | 13.8862 | 8.0086 |
| C          | 0.705   | 15.0865 | 8.0305 | C     | 0.7335 | 15.0988 | 8.0094 | C     | 0.7149 | 15.1149 | 8.0069 |
| C          | 2.1295  | 15.0874 | 8.0229 | C     | 2.1578 | 15.1007 | 7.9966 | C     | 2.1401 | 15.1179 | 8.007  |
| C          | 2.8288  | 13.8599 | 8.0539 | C     | 2.8571 | 13.8731 | 8.0018 | C     | 2.8435 | 13.8887 | 8.0154 |
| C          | 4.2663  | 13.8596 | 8.06   | C     | 4.2943 | 13.8745 | 8.0106 | C     | 4.2742 | 13.886  | 8.0108 |
| C          | 4.9653  | 15.0874 | 8.0263 | C     | 4.9929 | 15.1027 | 7.9999 | C     | 4.9737 | 15.1139 | 8.0051 |
| C          | 6.3896  | 15.087  | 8.0324 | C     | 6.4179 | 15.103  | 8.0124 | C     | 6.4006 | 15.1152 | 8.0045 |
| C          | 7.0888  | 13.8589 | 8.0743 | C     | 7.1184 | 13.876  | 8.0462 | C     | 7.1021 | 13.8814 | 8.0046 |

|         |         |         |         |   |         |            |        |   |        |         |        |
|---------|---------|---------|---------|---|---------|------------|--------|---|--------|---------|--------|
| C       | 0.0001  | 11.3871 | 8.1402  | C | 0.0331  | 11.389     | 8.0971 | C | 0.0182 | 11.4176 | 7.9918 |
| C       | 0.7068  | 12.629  | 8.1064  | C | 0.736   | 12.6374    | 8.0673 | C | 0.7211 | 12.6545 | 8.0171 |
| C       | 2.1285  | 12.6318 | 8.1052  | C | 2.1564  | 12.6435    | 8.0379 | C | 2.142  | 12.6575 | 8.0302 |
| C       | 2.8342  | 11.3945 | 8.2057  | C | 2.8605  | 11.4068    | 8.1383 | C | 2.8506 | 11.4203 | 8.0597 |
| C       | 4.2608  | 11.3935 | 8.2218  | C | 4.2884  | 11.4125    | 8.1706 | C | 4.2781 | 11.422  | 8.0321 |
| C       | 4.9672  | 12.6314 | 8.1244  | C | 4.9951  | 12.6477    | 8.0716 | C | 4.9745 | 12.6477 | 8.0097 |
| C       | 6.3886  | 12.6305 | 8.1278  | C | 6.4189  | 12.6485    | 8.0902 | C | 6.4054 | 12.6505 | 7.999  |
| C       | 7.093   | 11.3866 | 8.1709  | C | 7.1244  | 11.4099    | 8.1258 | C | 7.1095 | 11.4156 | 7.9704 |
| C       | -0.0492 | 8.9839  | 8.1127  | C | -0.0052 | 8.9467     | 7.858  | C | 0.0172 | 8.9459  | 7.8728 |
| C       | 0.704   | 10.1534 | 8.1836  | C | 0.7289  | 10.1538    | 8.0862 | C | 0.7234 | 10.191  | 7.9939 |
| C       | 2.1434  | 10.1697 | 8.3107  | C | 2.1662  | 10.1829    | 8.2708 | C | 2.1435 | 10.203  | 8.0768 |
| C       | 2.849   | 8.9854  | 8.5807  | C | 2.8858  | 9.0398     | 8.6821 | C | 2.8645 | 8.9485  | 8.1439 |
| C       | 4.2269  | 8.9854  | 8.5999  | C | 4.2671  | 9.0416     | 8.6992 | C | 4.2813 | 8.978   | 8.0894 |
| C       | 4.9507  | 10.1674 | 8.3514  | C | 4.9846  | 10.1963    | 8.3396 | C | 4.9728 | 10.1682 | 8.0108 |
| C       | 6.3951  | 10.1616 | 8.2452  | C | 6.4254  | 10.1864    | 8.1873 | C | 6.427  | 10.1737 | 7.9165 |
| C       | 7.1106  | 8.9443  | 8.1452  | C | 7.1278  | 8.9935     | 7.9802 | C | 7.1439 | 8.984   | 7.8077 |
| H       | 2.2888  | 8.0741  | 8.7766  | H | 2.3444  | 8.1656     | 9.0318 | H | 2.4992 | 8.2562  | 9.2087 |
| H       | 4.754   | 8.0598  | 8.8284  | H | 4.8043  | 8.1475     | 9.0164 | H | 4.8036 | 8.0232  | 8.106  |
| H       | 6.5623  | 8.0054  | 8.0589  | H | 6.5676  | 8.0702     | 7.8214 | H | 6.6261 | 8.0328  | 7.6942 |
| H       | 0.2127  | 23.422  | 8.0099  | H | 0.2381  | 23.4338    | 8.0033 | H | 0.2182 | 23.447  | 8.0029 |
| H       | 2.6217  | 23.4219 | 8.01    | H | 2.6471  | 23.4346    | 8.0043 | H | 2.6278 | 23.4485 | 8.0031 |
| H       | 4.4727  | 23.4217 | 8.0114  | H | 4.497   | 23.434     | 8.0063 | H | 4.4779 | 23.4458 | 8.0039 |
| H       | 6.8822  | 23.4215 | 8.0114  | H | 6.9061  | 23.4349    | 8.0057 | H | 6.8872 | 23.4476 | 8.0036 |
| H       | -0.543  | 6.6824  | 7.2212  | H | -0.2802 | 6.9206     | 7.2054 | H | 0.1771 | 6.7794  | 7.7396 |
| C       | 0.5034  | 6.8879  | 7.1024  | C | 0.5258  | 7.6719     | 7.3143 | C | 0.7281 | 7.7141  | 7.8422 |
| C       | 1.6538  | 6.6785  | 6.7437  | C | 1.7118  | 7.3572     | 6.8568 | C | 2.1033 | 7.6902  | 8.0188 |
| H       | 2.6982  | 6.6653  | 6.5071  | H | 2.6875  | 7.1022     | 6.4962 | H | 2.6838 | 6.7685  | 7.9624 |
| A3=A4+H |         |         | A2=A4+H |   |         | A0+C2H2=B1 |        |   |        |         |        |
| C       | 0.0214  | 21.2737 | 8.0034  | C | 0.0181  | 21.2846    | 8.005  | C | 0.0274 | 21.2519 | 8.0066 |
| C       | 0.7438  | 22.4833 | 8.0014  | C | 0.7406  | 22.4942    | 8.0033 | C | 0.7476 | 22.4594 | 8.0054 |
| C       | 2.1142  | 22.4833 | 8.0015  | C | 2.1109  | 22.4941    | 8.0032 | C | 2.1202 | 22.4594 | 8.0054 |
| C       | 2.836   | 21.2736 | 8.0035  | C | 2.833   | 21.2844    | 8.0049 | C | 2.8397 | 21.2519 | 8.0064 |
| C       | 4.2808  | 21.2737 | 8.0038  | C | 4.2775  | 21.2845    | 8.0051 | C | 4.2869 | 21.2518 | 8.0063 |
| C       | 5.0028  | 22.4826 | 8.0028  | C | 4.9999  | 22.4933    | 8.0041 | C | 5.0068 | 22.4592 | 8.0057 |
| C       | 6.374   | 22.4827 | 8.0027  | C | 6.3709  | 22.4934    | 8.0041 | C | 6.3796 | 22.4589 | 8.0058 |
| C       | 7.0965  | 21.2738 | 8.0037  | C | 7.0936  | 21.2845    | 8.0051 | C | 7.1    | 21.2516 | 8.0065 |
| C       | 0.0081  | 18.8038 | 8.0044  | C | 0.005   | 18.8153    | 8.0062 | C | 0.0142 | 18.7801 | 8.0057 |
| C       | 0.7144  | 20.0456 | 8.0041  | C | 0.7113  | 20.0565    | 8.0057 | C | 0.7198 | 20.023  | 8.0067 |
| C       | 2.1431  | 20.0456 | 8.0041  | C | 2.14    | 20.0566    | 8.0057 | C | 2.1475 | 20.0231 | 8.0065 |
| C       | 2.8491  | 18.8038 | 8.0045  | C | 2.8462  | 18.8152    | 8.0061 | C | 2.8526 | 18.7803 | 8.0052 |
| C       | 4.2676  | 18.8039 | 8.0046  | C | 4.2646  | 18.8153    | 8.0061 | C | 4.2736 | 18.7801 | 8.005  |
| C       | 4.9742  | 20.0453 | 8.0044  | C | 4.9712  | 20.0561    | 8.0056 | C | 4.9793 | 20.0229 | 8.0062 |
| C       | 6.4028  | 20.0454 | 8.0044  | C | 6.3999  | 20.0562    | 8.0057 | C | 6.4072 | 20.0227 | 8.0064 |
| C       | 7.1095  | 18.8039 | 8.0045  | C | 7.1066  | 18.8151    | 8.0062 | C | 7.113  | 18.7799 | 8.0054 |
| C       | 0.0119  | 16.3443 | 8.0052  | C | 0.0093  | 16.3562    | 8.0073 | C | 0.0159 | 16.3219 | 8.0024 |
| C       | 0.7106  | 17.5708 | 8.0046  | C | 0.7079  | 17.5822    | 8.0067 | C | 0.7147 | 17.5496 | 8.0039 |
| C       | 2.1468  | 17.5707 | 8.0044  | C | 2.1436  | 17.5826    | 8.0065 | C | 2.1523 | 17.5498 | 8.0033 |
| C       | 2.8451  | 16.3443 | 8.0044  | C | 2.8425  | 16.3561    | 8.0066 | C | 2.8506 | 16.3222 | 8      |
| C       | 4.272   | 16.3432 | 8.0047  | C | 4.2693  | 16.355     | 8.0068 | C | 4.2755 | 16.3218 | 7.9998 |

|       |        |         |         |   |        |         |        |   |         |         |        |
|-------|--------|---------|---------|---|--------|---------|--------|---|---------|---------|--------|
| C     | 4.9711 | 17.571  | 8.0049  | C | 4.9685 | 17.5824 | 8.0067 | C | 4.9742  | 17.5495 | 8.0029 |
| C     | 6.4058 | 17.571  | 8.0049  | C | 6.4026 | 17.5825 | 8.007  | C | 6.412   | 17.5493 | 8.0033 |
| C     | 7.1049 | 16.3433 | 8.0052  | C | 7.102  | 16.3545 | 8.0077 | C | 7.1109  | 16.3215 | 8.0021 |
| C     | 0.0157 | 13.8736 | 8.0055  | C | 0.0135 | 13.8859 | 8.0054 | C | 0.0215  | 13.8533 | 8.0062 |
| C     | 0.7172 | 15.103  | 8.0056  | C | 0.7148 | 15.1151 | 8.0072 | C | 0.7211  | 15.0807 | 8.0012 |
| C     | 2.1398 | 15.103  | 8.0047  | C | 2.1375 | 15.1156 | 8.0065 | C | 2.1456  | 15.0813 | 7.9981 |
| C     | 2.8407 | 13.8737 | 8.0044  | C | 2.8395 | 13.886  | 8.0054 | C | 2.8445  | 13.8541 | 7.9997 |
| C     | 4.2765 | 13.869  | 8.0022  | C | 4.2738 | 13.8813 | 8.0058 | C | 4.2821  | 13.8531 | 8.0015 |
| C     | 4.9784 | 15.1035 | 8.0042  | C | 4.9758 | 15.1151 | 8.0068 | C | 4.9808  | 15.0807 | 7.9989 |
| C     | 6.398  | 15.1034 | 8.005   | C | 6.3956 | 15.1155 | 8.0075 | C | 6.4052  | 15.0803 | 8.0016 |
| C     | 7.1    | 13.8693 | 8.004   | C | 7.098  | 13.8802 | 8.0043 | C | 7.1043  | 13.8522 | 8.0076 |
| C     | 0.0085 | 11.4064 | 7.9922  | C | 0.0081 | 11.4205 | 7.9807 | C | 0.0153  | 11.382  | 8.0254 |
| C     | 0.7162 | 12.6455 | 8.005   | C | 0.715  | 12.658  | 8.0021 | C | 0.7228  | 12.6236 | 8.0138 |
| C     | 2.1401 | 12.6456 | 8.0065  | C | 2.1388 | 12.6582 | 8.0049 | C | 2.1441  | 12.6252 | 8.0139 |
| C     | 2.8474 | 11.4068 | 8.0059  | C | 2.8463 | 11.4194 | 8.014  | C | 2.8505  | 11.3851 | 8.0682 |
| C     | 4.2683 | 11.3987 | 7.9943  | C | 4.2681 | 11.4119 | 8.0061 | C | 4.2769  | 11.3823 | 8.0736 |
| C     | 4.9752 | 12.6426 | 7.9964  | C | 4.973  | 12.6524 | 8.0017 | C | 4.9827  | 12.6232 | 8.0205 |
| C     | 6.4006 | 12.6422 | 7.9968  | C | 6.3995 | 12.6541 | 7.9954 | C | 6.4036  | 12.6222 | 8.0213 |
| C     | 7.1069 | 11.399  | 7.9819  | C | 7.1068 | 11.411  | 7.9708 | C | 7.1076  | 11.3776 | 8.0351 |
| C     | 0.0154 | 8.9431  | 7.9323  | C | 0.0184 | 8.9589  | 7.8973 | C | -0.0343 | 8.9813  | 8.0005 |
| C     | 0.7146 | 10.1807 | 7.9852  | C | 0.7167 | 10.195  | 7.9692 | C | 0.7193  | 10.1505 | 8.0552 |
| C     | 2.141  | 10.1803 | 8.0057  | C | 2.1373 | 10.198  | 8.0181 | C | 2.1612  | 10.1586 | 8.1401 |
| C     | 2.8403 | 8.9454  | 8.0086  | C | 2.8378 | 8.952   | 8.1106 | C | 2.8681  | 8.9597  | 8.3307 |
| C     | 4.2385 | 8.9657  | 7.998   | C | 4.2503 | 8.9782  | 8.0159 | C | 4.2436  | 8.9568  | 8.3316 |
| C     | 4.9558 | 10.1578 | 7.9778  | C | 4.9592 | 10.166  | 7.9781 | C | 4.9652  | 10.1519 | 8.1493 |
| C     | 6.4179 | 10.1574 | 7.9488  | C | 6.4206 | 10.1704 | 7.9327 | C | 6.4107  | 10.1502 | 8.0716 |
| C     | 7.1335 | 8.967   | 7.9004  | C | 7.141  | 8.9801  | 7.8732 | C | 7.1276  | 8.9323  | 8.008  |
| H     | 2.332  | 7.2106  | 10.0549 | H | 2.8219 | 8.8385  | 9.9445 | H | 2.3141  | 8.0358  | 8.4869 |
| H     | 4.7538 | 8.0067  | 8.0054  | H | 4.7638 | 8.0186  | 8.0145 | H | 4.7686  | 8.0161  | 8.4864 |
| H     | 6.6179 | 8.0096  | 7.8473  | H | 6.6264 | 8.0225  | 7.8127 | H | 6.6086  | 7.9783  | 7.9425 |
| H     | 0.2251 | 23.4386 | 7.9982  | H | 0.222  | 23.4495 | 8.0008 | H | 0.2292  | 23.4147 | 8.0032 |
| H     | 2.6328 | 23.4385 | 7.9984  | H | 2.6296 | 23.4493 | 8.0007 | H | 2.6387  | 23.4146 | 8.0034 |
| H     | 4.4845 | 23.4381 | 8.0007  | H | 4.4817 | 23.4489 | 8.0022 | H | 4.4884  | 23.4145 | 8.0043 |
| H     | 6.8922 | 23.4382 | 8.0005  | H | 6.8892 | 23.4489 | 8.0022 | H | 6.8983  | 23.4141 | 8.0043 |
| H     | 0.1794 | 6.7784  | 7.8873  | H | 0.1912 | 6.7951  | 7.7367 | H | 1.057   | 7.115   | 6.5708 |
| C     | 0.7387 | 7.715   | 7.9274  | C | 0.7497 | 7.7264  | 7.8493 | C | 0.5876  | 6.7468  | 7.4627 |
| C     | 2.1092 | 7.7085  | 8.0106  | C | 2.1046 | 7.717   | 7.9521 | C | 0.1606  | 5.9708  | 8.3055 |
| H     | 2.6677 | 6.7852  | 7.805   | H | 2.668  | 6.7825  | 7.9331 | H | -0.2789 | 5.4699  | 9.1448 |
| B1=B2 |        |         | B2=A1   |   |        | B2=D1+H |        |   |         |         |        |
| C     | 0.0449 | 21.2799 | 8.0078  | C | 0.0324 | 21.2691 | 8.0062 | C | 0.0533  | 21.2749 | 8.0101 |
| C     | 0.7673 | 22.4885 | 8.0077  | C | 0.7551 | 22.4784 | 8.0078 | C | 0.7741  | 22.4824 | 8.0106 |
| C     | 2.1387 | 22.4883 | 8.0075  | C | 2.1259 | 22.4782 | 8.0081 | C | 2.1465  | 22.4828 | 8.0107 |
| C     | 2.8596 | 21.28   | 8.0076  | C | 2.8477 | 21.2692 | 8.0065 | C | 2.8666  | 21.2752 | 8.0103 |
| C     | 4.3048 | 21.2803 | 8.0076  | C | 4.2919 | 21.2689 | 8.0066 | C | 4.3134  | 21.2756 | 8.0103 |
| C     | 5.0262 | 22.4889 | 8.008   | C | 5.014  | 22.4781 | 8.0086 | C | 5.0333  | 22.4833 | 8.0114 |
| C     | 6.3978 | 22.4886 | 8.0081  | C | 6.385  | 22.478  | 8.0086 | C | 6.4057  | 22.4834 | 8.0113 |
| C     | 7.1195 | 21.2804 | 8.0078  | C | 7.1079 | 21.2694 | 8.0064 | C | 7.1263  | 21.2758 | 8.0102 |
| C     | 0.031  | 18.8093 | 8.0057  | C | 0.0196 | 18.7988 | 8.0027 | C | 0.0401  | 18.804  | 8.0081 |
| C     | 0.7378 | 20.0514 | 8.007   | C | 0.7257 | 20.0408 | 8.0042 | C | 0.7462  | 20.0464 | 8.0094 |

|   |         |         |        |   |         |         |        |   |        |         |        |
|---|---------|---------|--------|---|---------|---------|--------|---|--------|---------|--------|
| C | 2.1662  | 20.0512 | 8.0069 | C | 2.1545  | 20.0403 | 8.0043 | C | 2.174  | 20.0466 | 8.0094 |
| C | 2.8712  | 18.8101 | 8.0053 | C | 2.86    | 18.7993 | 8.0022 | C | 2.8798 | 18.8046 | 8.0079 |
| C | 4.2908  | 18.8102 | 8.0053 | C | 4.2791  | 18.7987 | 8.002  | C | 4.3003 | 18.8054 | 8.0077 |
| C | 4.9973  | 20.0519 | 8.0069 | C | 4.9853  | 20.0405 | 8.0043 | C | 5.0058 | 20.0473 | 8.0092 |
| C | 6.4256  | 20.0518 | 8.0071 | C | 6.4139  | 20.0404 | 8.0042 | C | 6.4336 | 20.0473 | 8.0092 |
| C | 7.131   | 18.8105 | 8.0058 | C | 7.1201  | 18.7993 | 8.0027 | C | 7.1395 | 18.8053 | 8.008  |
| C | 0.032   | 16.349  | 8.004  | C | 0.0224  | 16.3385 | 8.0125 | C | 0.0425 | 16.3446 | 8.0055 |
| C | 0.7324  | 17.5774 | 8.0037 | C | 0.7224  | 17.5667 | 8.0033 | C | 0.7413 | 17.5728 | 8.0062 |
| C | 2.1683  | 17.5774 | 8.0029 | C | 2.1572  | 17.5657 | 8.0016 | C | 2.1787 | 17.5735 | 8.0056 |
| C | 2.8658  | 16.3504 | 7.9993 | C | 2.8556  | 16.3389 | 8.0022 | C | 2.8771 | 16.3462 | 8.0019 |
| C | 4.2922  | 16.3502 | 7.9996 | C | 4.2827  | 16.3372 | 8.002  | C | 4.3025 | 16.3473 | 8.0019 |
| C | 4.9923  | 17.579  | 8.0032 | C | 4.982   | 17.5665 | 8.0012 | C | 5.0012 | 17.5749 | 8.0054 |
| C | 6.4274  | 17.5789 | 8.0041 | C | 6.4163  | 17.5664 | 8.0034 | C | 6.4384 | 17.5749 | 8.0061 |
| C | 7.1259  | 16.3513 | 8.0042 | C | 7.1159  | 16.3391 | 8.0127 | C | 7.1372 | 16.3475 | 8.0056 |
| C | 0.0328  | 13.8763 | 8.0184 | C | 0.0242  | 13.869  | 8.0723 | C | 0.0483 | 13.8713 | 8.0145 |
| C | 0.7356  | 15.1072 | 8.0057 | C | 0.7273  | 15.0992 | 8.0295 | C | 0.7476 | 15.1016 | 8.0058 |
| C | 2.1594  | 15.1084 | 7.999  | C | 2.1502  | 15.0978 | 8.0157 | C | 2.1717 | 15.104  | 8.0007 |
| C | 2.8577  | 13.8796 | 8.003  | C | 2.8507  | 13.8687 | 8.037  | C | 2.8703 | 13.8763 | 8.0026 |
| C | 4.2936  | 13.8792 | 8.0055 | C | 4.2856  | 13.8653 | 8.0445 | C | 4.3082 | 13.8783 | 8.0037 |
| C | 4.9958  | 15.1115 | 8.0003 | C | 4.9874  | 15.099  | 8.0183 | C | 5.0078 | 15.1069 | 8.0012 |
| C | 6.4191  | 15.111  | 8.0061 | C | 6.4099  | 15.0985 | 8.0309 | C | 6.4319 | 15.1071 | 8.006  |
| C | 7.1191  | 13.882  | 8.0192 | C | 7.1117  | 13.8697 | 8.0742 | C | 7.1318 | 13.879  | 8.0147 |
| C | 0.0278  | 11.3963 | 8.0415 | C | 0.0178  | 11.3986 | 8.1222 | C | 0.0458 | 11.3885 | 8.0308 |
| C | 0.7326  | 12.6443 | 8.0334 | C | 0.7256  | 12.641  | 8.1046 | C | 0.7485 | 12.6384 | 8.0261 |
| C | 2.1537  | 12.6501 | 8.0298 | C | 2.1486  | 12.6408 | 8.088  | C | 2.1688 | 12.6464 | 8.0236 |
| C | 2.8542  | 11.413  | 8.1146 | C | 2.8513  | 11.4053 | 8.1873 | C | 2.8716 | 11.4079 | 8.0977 |
| C | 4.2801  | 11.415  | 8.1213 | C | 4.2768  | 11.4015 | 8.216  | C | 4.2982 | 11.4141 | 8.1007 |
| C | 4.991   | 12.6534 | 8.0375 | C | 4.9836  | 12.6409 | 8.114  | C | 5.0078 | 12.6517 | 8.0272 |
| C | 6.4175  | 12.6516 | 8.0411 | C | 6.4103  | 12.638  | 8.1227 | C | 6.4319 | 12.6515 | 8.0285 |
| C | 7.1205  | 11.4165 | 8.0561 | C | 7.1128  | 11.4039 | 8.1539 | C | 7.1389 | 11.4123 | 8.0353 |
| C | -0.0131 | 8.943   | 7.8952 | C | -0.0117 | 8.9595  | 7.8589 | C | 0.0001 | 8.9351  | 7.9166 |
| C | 0.7258  | 10.1632 | 8.0573 | C | 0.7219  | 10.1729 | 8.1065 | C | 0.7409 | 10.1504 | 8.0516 |
| C | 2.1568  | 10.1823 | 8.2177 | C | 2.147   | 10.178  | 8.289  | C | 2.1828 | 10.176  | 8.1951 |
| C | 2.8821  | 9.013   | 8.5215 | C | 2.862   | 9.0134  | 8.6416 | C | 2.9139 | 9.008   | 8.4781 |
| C | 4.26    | 9.0178  | 8.5306 | C | 4.242   | 9.0135  | 8.6735 | C | 4.2889 | 9.0129  | 8.4687 |
| C | 4.9734  | 10.193  | 8.2377 | C | 4.9694  | 10.1775 | 8.3621 | C | 4.9944 | 10.1949 | 8.1967 |
| C | 6.4146  | 10.1861 | 8.0919 | C | 6.4132  | 10.1609 | 8.2127 | C | 6.4345 | 10.1915 | 8.0613 |
| C | 7.1016  | 8.9923  | 7.926  | C | 7.106   | 8.9745  | 7.9971 | C | 7.1262 | 8.9908  | 7.9283 |
| H | 2.3521  | 8.1018  | 8.7887 | H | 2.3174  | 8.1172  | 8.9331 | H | 2.3935 | 8.0846  | 8.7057 |
| H | 4.7961  | 8.1059  | 8.7911 | H | 4.7713  | 8.1054  | 8.9625 | H | 4.8225 | 8.0902  | 8.6894 |
| H | 6.5561  | 8.0598  | 7.7934 | H | 6.5586  | 8.0432  | 7.847  | H | 6.585  | 8.0532  | 7.8263 |
| H | 0.2489  | 23.444  | 8.0073 | H | 0.2361  | 23.4336 | 8.0087 | H | 0.2557 | 23.4379 | 8.0115 |
| H | 2.6575  | 23.4436 | 8.007  | H | 2.6447  | 23.4334 | 8.0092 | H | 2.6646 | 23.4383 | 8.0117 |
| H | 4.5081  | 23.4445 | 8.0082 | H | 4.4951  | 23.4332 | 8.0103 | H | 4.5152 | 23.4388 | 8.013  |
| H | 6.9164  | 23.444  | 8.0081 | H | 6.9037  | 23.4334 | 8.0104 | H | 6.9236 | 23.4391 | 8.0129 |
| H | 1.2131  | 7.2129  | 6.6597 | H | 0.2216  | 7.1579  | 6.3093 | H | 1.0626 | 5.9488  | 5.2523 |
| C | 0.4997  | 7.6583  | 7.5861 | C | 0.6343  | 7.8598  | 7.259  | C | 0.5154 | 7.6163  | 7.773  |
| C | 0.5365  | 6.367   | 7.4738 | C | 1.5115  | 7.0612  | 6.7352 | C | 0.7617 | 6.4302  | 7.6406 |
| H | 0.497   | 5.4391  | 8.0557 | H | 2.3217  | 6.3816  | 7.0233 | H | 1.0333 | 5.396   | 7.6311 |

| C2=D1+H |        |         | B2=B3  |   |        | B3=B4   |        |   |        |         |        |
|---------|--------|---------|--------|---|--------|---------|--------|---|--------|---------|--------|
| C       | 0.0502 | 21.2493 | 8.0107 | C | 0.0559 | 21.2748 | 8.006  | C | 0.0273 | 21.2549 | 8.0127 |
| C       | 0.7707 | 22.4573 | 8.0119 | C | 0.7769 | 22.4822 | 8.005  | C | 0.7478 | 22.4626 | 8.0136 |
| C       | 2.143  | 22.4578 | 8.0117 | C | 2.1495 | 22.4824 | 8.005  | C | 2.1203 | 22.4627 | 8.0139 |
| C       | 2.8635 | 21.2498 | 8.0104 | C | 2.8693 | 21.275  | 8.006  | C | 2.84   | 21.2548 | 8.0132 |
| C       | 4.3103 | 21.2501 | 8.0102 | C | 4.3162 | 21.2747 | 8.0061 | C | 4.2871 | 21.2538 | 8.0132 |
| C       | 5.0299 | 22.4582 | 8.0112 | C | 5.0363 | 22.4822 | 8.0051 | C | 5.007  | 22.4614 | 8.014  |
| C       | 6.4022 | 22.4582 | 8.0113 | C | 6.4086 | 22.4824 | 8.005  | C | 6.3796 | 22.4615 | 8.0138 |
| C       | 7.1233 | 21.2502 | 8.0106 | C | 7.1289 | 21.2748 | 8.0061 | C | 7.1001 | 21.2539 | 8.0127 |
| C       | 0.0383 | 18.777  | 8.0081 | C | 0.0417 | 18.8043 | 8.0062 | C | 0.014  | 18.7837 | 8.013  |
| C       | 0.7435 | 20.0202 | 8.0095 | C | 0.7484 | 20.0464 | 8.0062 | C | 0.7198 | 20.0263 | 8.0126 |
| C       | 2.1716 | 20.0206 | 8.0094 | C | 2.1762 | 20.0467 | 8.0062 | C | 2.1477 | 20.0263 | 8.0128 |
| C       | 2.8777 | 18.7777 | 8.0077 | C | 2.8817 | 18.8049 | 8.0062 | C | 2.8531 | 18.7836 | 8.0129 |
| C       | 4.2983 | 18.7784 | 8.0074 | C | 4.3022 | 18.8043 | 8.0062 | C | 4.2738 | 18.7817 | 8.0128 |
| C       | 5.003  | 20.0213 | 8.009  | C | 5.0082 | 20.0462 | 8.0064 | C | 4.9794 | 20.0247 | 8.0127 |
| C       | 6.4311 | 20.0212 | 8.0092 | C | 6.4358 | 20.0463 | 8.0064 | C | 6.4073 | 20.0248 | 8.0125 |
| C       | 7.1374 | 18.7783 | 8.0079 | C | 7.1409 | 18.8041 | 8.0062 | C | 7.1131 | 18.7818 | 8.0128 |
| C       | 0.0421 | 16.3164 | 8.0063 | C | 0.0425 | 16.3461 | 8.0064 | C | 0.0157 | 16.3261 | 8.0159 |
| C       | 0.74   | 17.545  | 8.0064 | C | 0.7423 | 17.5738 | 8.0062 | C | 0.7148 | 17.5534 | 8.014  |
| C       | 2.1774 | 17.5458 | 8.0058 | C | 2.1799 | 17.5747 | 8.0063 | C | 2.1525 | 17.5534 | 8.0137 |
| C       | 2.8765 | 16.3183 | 8.0036 | C | 2.8781 | 16.3478 | 8.0069 | C | 2.8512 | 16.3262 | 8.0141 |
| C       | 4.302  | 16.3194 | 8.0038 | C | 4.3033 | 16.3457 | 8.0066 | C | 4.2763 | 16.3215 | 8.0139 |
| C       | 4.9999 | 17.5473 | 8.0055 | C | 5.0022 | 17.5734 | 8.006  | C | 4.9745 | 17.5499 | 8.0132 |
| C       | 6.4369 | 17.5472 | 8.006  | C | 6.4394 | 17.5735 | 8.0058 | C | 6.412  | 17.5501 | 8.0137 |
| C       | 7.1366 | 16.3193 | 8.006  | C | 7.1373 | 16.3457 | 8.0061 | C | 7.1104 | 16.322  | 8.0157 |
| C       | 0.0498 | 13.8428 | 8.0168 | C | 0.047  | 13.8762 | 8.0084 | C | 0.021  | 13.86   | 8.0198 |
| C       | 0.748  | 15.0735 | 8.0082 | C | 0.7474 | 15.105  | 8.0074 | C | 0.7212 | 15.0868 | 8.0175 |
| C       | 2.1721 | 15.0762 | 8.0051 | C | 2.172  | 15.1075 | 8.0081 | C | 2.1458 | 15.087  | 8.0153 |
| C       | 2.8718 | 13.8484 | 8.0131 | C | 2.871  | 13.8813 | 8.0092 | C | 2.8461 | 13.8608 | 8.0141 |
| C       | 4.3091 | 13.8508 | 8.0158 | C | 4.3087 | 13.8752 | 8.0094 | C | 4.2834 | 13.8479 | 8.0153 |
| C       | 5.0082 | 15.0794 | 8.0066 | C | 5.0077 | 15.104  | 8.0078 | C | 4.9814 | 15.0781 | 8.0155 |
| C       | 6.4322 | 15.0794 | 8.0094 | C | 6.4318 | 15.1042 | 8.0076 | C | 6.4051 | 15.0786 | 8.0174 |
| C       | 7.1331 | 13.8507 | 8.0196 | C | 7.1304 | 13.8761 | 8.0095 | C | 7.1033 | 13.8491 | 8.0201 |
| C       | 0.0497 | 11.359  | 8.0182 | C | 0.0394 | 11.4021 | 8.0105 | C | 0.0059 | 11.3983 | 7.9989 |
| C       | 0.7511 | 12.6092 | 8.025  | C | 0.7472 | 12.6467 | 8.0083 | C | 0.7212 | 12.6348 | 8.015  |
| C       | 2.1715 | 12.6175 | 8.0305 | C | 2.1689 | 12.6547 | 8.0076 | C | 2.1461 | 12.6354 | 8.0119 |
| C       | 2.874  | 11.3772 | 8.0943 | C | 2.8771 | 11.4193 | 8.0031 | C | 2.8615 | 11.4009 | 8.011  |
| C       | 4.3011 | 11.3857 | 8.1091 | C | 4.3041 | 11.4013 | 8.0048 | C | 4.2873 | 11.3624 | 8.0159 |
| C       | 5.0094 | 12.623  | 8.0442 | C | 5.0085 | 12.6454 | 8.0096 | C | 4.9842 | 12.6139 | 8.017  |
| C       | 6.4345 | 12.6235 | 8.0393 | C | 6.4298 | 12.6454 | 8.0106 | C | 6.4019 | 12.6154 | 8.0196 |
| C       | 7.143  | 11.3838 | 8.0375 | C | 7.1339 | 11.4048 | 8.0095 | C | 7.101  | 11.3675 | 8.0082 |
| C       | 0.0021 | 8.9071  | 7.8642 | C | 0.0317 | 8.937   | 8.0129 | C | 0.07   | 8.9439  | 7.8904 |
| C       | 0.7458 | 10.1198 | 8.0036 | C | 0.7331 | 10.1755 | 8.0138 | C | 0.7129 | 10.1932 | 7.9611 |
| C       | 2.1858 | 10.142  | 8.135  | C | 2.1774 | 10.1955 | 8.0035 | C | 2.1454 | 10.1912 | 7.9979 |
| C       | 2.9178 | 8.9565  | 8.3641 | C | 2.908  | 9.0133  | 7.9875 | C | 2.8323 | 8.9902  | 8.0194 |
| C       | 4.299  | 8.9712  | 8.3814 | C | 4.2685 | 8.9544  | 7.9824 | C | 4.2017 | 8.9039  | 8.0297 |
| C       | 5.0001 | 10.1628 | 8.1841 | C | 4.9938 | 10.1682 | 7.998  | C | 4.9645 | 10.1111 | 8.0151 |
| C       | 6.441  | 10.1632 | 8.0578 | C | 6.4461 | 10.1679 | 8.0003 | C | 6.4338 | 10.112  | 7.9938 |
| C       | 7.1315 | 8.9639  | 7.9051 | C | 7.1616 | 8.9676  | 7.9916 | C | 7.1961 | 8.9186  | 7.9217 |

|       |         |         |         |   |         |         |        |   |         |         |        |
|-------|---------|---------|---------|---|---------|---------|--------|---|---------|---------|--------|
| H     | 2.5324  | 8.3494  | 10.3435 | H | 1.1133  | 5.5975  | 8.0728 | H | 1.4161  | 5.7334  | 8.2827 |
| H     | 4.8288  | 8.0381  | 8.5625  | H | 4.7763  | 7.9917  | 7.9617 | H | 4.7057  | 7.9373  | 8.0604 |
| H     | 6.5908  | 8.0278  | 7.793   | H | 6.6345  | 8.0167  | 7.9657 | H | 6.6944  | 7.9536  | 7.8562 |
| H     | 0.2514  | 23.4123 | 8.0136  | H | 0.259   | 23.4379 | 8.0035 | H | 0.2293  | 23.4179 | 8.0153 |
| H     | 2.6609  | 23.4133 | 8.0134  | H | 2.6675  | 23.438  | 8.0036 | H | 2.6388  | 23.418  | 8.0155 |
| H     | 4.5112  | 23.4134 | 8.0124  | H | 4.5182  | 23.4378 | 8.0033 | H | 4.4885  | 23.4167 | 8.0159 |
| H     | 6.92    | 23.4138 | 8.0126  | H | 6.9269  | 23.4379 | 8.0032 | H | 6.8981  | 23.4168 | 8.0157 |
| H     | 2.4087  | 8.0001  | 8.3865  | H | 1.9876  | 7.9793  | 7.9397 | H | 1.3943  | 7.638   | 6.7317 |
| C     | 0.509   | 7.5919  | 7.6483  | C | 0.7579  | 7.6839  | 8.007  | C | 0.9464  | 7.7517  | 7.7259 |
| C     | 0.7495  | 6.4159  | 7.452   | C | 0.3881  | 6.4104  | 8.139  | C | 0.8703  | 6.6445  | 8.5277 |
| H     | 1.0234  | 5.3929  | 7.3012  | H | -0.6533 | 6.1214  | 8.325  | H | 0.3164  | 6.6656  | 9.4668 |
| B4=B5 |         |         | B5=B6+H |   |         | B4=B6+H |        |   |         |         |        |
| C     | 0.0258  | 21.2553 | 8.0074  | C | 0.0464  | 21.268  | 8.0048 | C | 0.0105  | 21.2443 | 8.0015 |
| C     | 0.7471  | 22.4638 | 8.0063  | C | 0.7672  | 22.4758 | 8.0035 | C | 0.7308  | 22.4524 | 7.9985 |
| C     | 2.1189  | 22.4639 | 8.0064  | C | 2.1398  | 22.4759 | 8.0033 | C | 2.1031  | 22.4524 | 7.9985 |
| C     | 2.8399  | 21.2553 | 8.0074  | C | 2.8601  | 21.2679 | 8.0038 | C | 2.8235  | 21.2442 | 8.0015 |
| C     | 4.2857  | 21.2529 | 8.0074  | C | 4.3068  | 21.2655 | 8.0034 | C | 4.2704  | 21.2418 | 8.0016 |
| C     | 5.0065  | 22.4612 | 8.0064  | C | 5.0264  | 22.4734 | 8.0023 | C | 4.991   | 22.4499 | 7.9995 |
| C     | 6.3782  | 22.4612 | 8.0064  | C | 6.3984  | 22.4736 | 8.0025 | C | 6.3632  | 22.4499 | 7.9995 |
| C     | 7.0999  | 21.253  | 8.0075  | C | 7.1195  | 21.2659 | 8.0044 | C | 7.0836  | 21.2418 | 8.0016 |
| C     | 0.0131  | 18.7847 | 8.0078  | C | 0.0336  | 18.7979 | 8.0027 | C | -0.0032 | 18.773  | 8.0023 |
| C     | 0.7189  | 20.027  | 8.008   | C | 0.7397  | 20.0399 | 8.0044 | C | 0.7027  | 20.0157 | 8.0026 |
| C     | 2.1476  | 20.027  | 8.008   | C | 2.1679  | 20.0399 | 8.0037 | C | 2.131   | 20.0157 | 8.0026 |
| C     | 2.8538  | 18.7847 | 8.0078  | C | 2.8747  | 18.7981 | 8.0015 | C | 2.8368  | 18.773  | 8.0023 |
| C     | 4.2738  | 18.7801 | 8.0076  | C | 4.2951  | 18.7933 | 8.0017 | C | 4.2574  | 18.7685 | 8.002  |
| C     | 4.9788  | 20.0234 | 8.008   | C | 4.9995  | 20.0365 | 8.0035 | C | 4.9629  | 20.0121 | 8.0024 |
| C     | 6.407   | 20.0234 | 8.008   | C | 6.4272  | 20.0365 | 8.0043 | C | 6.391   | 20.0122 | 8.0024 |
| C     | 7.1129  | 18.7802 | 8.0077  | C | 7.133   | 18.7935 | 8.0028 | C | 7.0963  | 18.7685 | 8.002  |
| C     | 0.0159  | 16.3281 | 8.0034  | C | 0.0367  | 16.3423 | 7.9945 | C | -0.0018 | 16.3168 | 7.9991 |
| C     | 0.7155  | 17.5544 | 8.0065  | C | 0.7361  | 17.5688 | 7.9987 | C | 0.6979  | 17.5432 | 8.0011 |
| C     | 2.1526  | 17.5543 | 8.0066  | C | 2.1739  | 17.5687 | 7.9982 | C | 2.1355  | 17.5432 | 8.0011 |
| C     | 2.8527  | 16.3281 | 8.0038  | C | 2.8744  | 16.3424 | 7.9938 | C | 2.835   | 16.3168 | 7.9991 |
| C     | 4.2786  | 16.3167 | 8.0037  | C | 4.2996  | 16.3309 | 7.995  | C | 4.2604  | 16.3059 | 7.9991 |
| C     | 4.9757  | 17.5463 | 8.0062  | C | 4.9959  | 17.5602 | 7.9991 | C | 4.9582  | 17.5349 | 8.0006 |
| C     | 6.4115  | 17.5463 | 8.0061  | C | 6.4329  | 17.5601 | 7.9995 | C | 6.3954  | 17.5349 | 8.0006 |
| C     | 7.1098  | 16.3169 | 8.0033  | C | 7.1311  | 16.3312 | 7.9956 | C | 7.0928  | 16.3059 | 7.9991 |
| C     | 0.0205  | 13.8662 | 7.9917  | C | 0.0431  | 13.8805 | 7.9951 | C | 0.0025  | 13.855  | 7.9968 |
| C     | 0.7228  | 15.0921 | 7.998   | C | 0.7443  | 15.1064 | 7.9901 | C | 0.7043  | 15.0807 | 7.9968 |
| C     | 2.1471  | 15.0918 | 7.9984  | C | 2.1688  | 15.1062 | 7.9897 | C | 2.1286  | 15.0808 | 7.9968 |
| C     | 2.8502  | 13.8661 | 7.9923  | C | 2.8712  | 13.8807 | 7.9935 | C | 2.8302  | 13.855  | 7.9967 |
| C     | 4.2868  | 13.8363 | 7.9972  | C | 4.3088  | 13.8513 | 8.0003 | C | 4.2679  | 13.8259 | 8.0009 |
| C     | 4.9834  | 15.0704 | 8.0006  | C | 5.0044  | 15.0835 | 7.995  | C | 4.965   | 15.0586 | 7.9991 |
| C     | 6.4056  | 15.0703 | 8.0002  | C | 6.4276  | 15.0834 | 7.9954 | C | 6.3881  | 15.0586 | 7.9992 |
| C     | 7.1038  | 13.8365 | 7.9964  | C | 7.1254  | 13.8515 | 8.0018 | C | 7.0848  | 13.8259 | 8.001  |
| C     | -0.0077 | 11.4202 | 7.9902  | C | 0.0143  | 11.4352 | 8.059  | C | -0.0281 | 11.408  | 8.0109 |
| C     | 0.721   | 12.6487 | 7.9818  | C | 0.743   | 12.6625 | 8.009  | C | 0.7008  | 12.6364 | 7.996  |
| C     | 2.1513  | 12.6481 | 7.9815  | C | 2.1735  | 12.6623 | 8.0076 | C | 2.1315  | 12.6365 | 7.996  |
| C     | 2.881   | 11.4194 | 7.9872  | C | 2.9039  | 11.4354 | 8.0566 | C | 2.8602  | 11.4081 | 8.011  |
| C     | 4.303   | 11.3361 | 8.0072  | C | 4.3254  | 11.3518 | 8.0747 | C | 4.2817  | 11.3255 | 8.0287 |

|       |        |         |        |   |        |         |        |   |        |         |        |
|-------|--------|---------|--------|---|--------|---------|--------|---|--------|---------|--------|
| C     | 4.9883 | 12.595  | 8.0013 | C | 5.0113 | 12.6102 | 8.0269 | C | 4.9697 | 12.5845 | 8.0122 |
| C     | 6.4029 | 12.5951 | 8.0011 | C | 6.4242 | 12.6101 | 8.0282 | C | 6.3829 | 12.5845 | 8.0122 |
| C     | 7.0901 | 11.3367 | 8.0092 | C | 7.1127 | 11.3522 | 8.0769 | C | 7.0704 | 11.3254 | 8.0286 |
| C     | 0.2021 | 8.9607  | 8.0832 | C | 0.2254 | 8.9809  | 8.2426 | C | 0.1751 | 8.9499  | 8.0917 |
| C     | 0.7294 | 10.2552 | 8.0084 | C | 0.7492 | 10.2704 | 8.1287 | C | 0.7055 | 10.2389 | 8.0307 |
| C     | 2.1443 | 10.2542 | 8.0052 | C | 2.1699 | 10.2708 | 8.1286 | C | 2.1264 | 10.239  | 8.0309 |
| C     | 2.6707 | 8.9586  | 8.0749 | C | 2.6946 | 8.9823  | 8.2461 | C | 2.6569 | 8.9501  | 8.0918 |
| C     | 4.096  | 8.8668  | 8.0846 | C | 4.115  | 8.8896  | 8.2488 | C | 4.0753 | 8.8584  | 8.1097 |
| C     | 4.9359 | 10.0382 | 8.0431 | C | 4.9591 | 10.0584 | 8.1575 | C | 4.9163 | 10.0311 | 8.0717 |
| C     | 6.4575 | 10.0387 | 8.047  | C | 6.4804 | 10.0585 | 8.1586 | C | 6.4356 | 10.0311 | 8.0717 |
| C     | 7.2974 | 8.8682  | 8.0975 | C | 7.3245 | 8.8896  | 8.2501 | C | 7.2766 | 8.8583  | 8.1097 |
| H     | 2.3731 | 6.1474  | 8.7658 | H | 2.4421 | 5.778   | 6.3058 | H | 2.3484 | 6.178   | 8.6615 |
| H     | 4.5822 | 7.8892  | 8.1185 | H | 4.5979 | 7.9131  | 8.3274 | H | 4.5589 | 7.88    | 8.1477 |
| H     | 6.8113 | 7.891   | 8.1424 | H | 6.8403 | 7.9139  | 8.3314 | H | 6.7931 | 7.8798  | 8.148  |
| H     | 0.2279 | 23.4189 | 8.0048 | H | 0.2488 | 23.4313 | 8.0007 | H | 0.2124 | 23.4078 | 7.9934 |
| H     | 2.6375 | 23.4192 | 8.0049 | H | 2.6576 | 23.4316 | 8.0009 | H | 2.6217 | 23.4077 | 7.9935 |
| H     | 4.4871 | 23.4161 | 8.0051 | H | 4.5074 | 23.4285 | 7.9997 | H | 4.4723 | 23.4051 | 7.9955 |
| H     | 6.8971 | 23.4164 | 8.005  | H | 6.9167 | 23.429  | 7.9995 | H | 6.882  | 23.405  | 7.9955 |
| H     | 1.4262 | 7.1907  | 7.271  | H | 0.5398 | 6.1789  | 8.6453 | H | 1.4186 | 7.9595  | 6.2128 |
| C     | 1.4349 | 8.0666  | 8.1439 | C | 1.4606 | 8.0785  | 8.3532 | C | 1.4163 | 8.0314  | 8.1498 |
| C     | 1.4315 | 6.6599  | 8.5888 | C | 1.4663 | 6.7478  | 8.5628 | C | 1.4168 | 6.7259  | 8.5213 |
| H     | 0.4875 | 6.157   | 8.7811 | H | 2.3989 | 6.1972  | 8.6892 | H | 0.4856 | 6.1773  | 8.6616 |
| B1=C1 |        |         | C1=C2  |   |        | B2=C1   |        |   |        |         |        |
| C     | 0.0557 | 21.2609 | 8.0063 | C | 0.0417 | 21.2517 | 8.0109 | C | 0.0583 | 21.271  | 8.0073 |
| C     | 0.7767 | 22.4688 | 8.0056 | C | 0.7651 | 22.4612 | 8.0133 | C | 0.7807 | 22.4798 | 8.0092 |
| C     | 2.1489 | 22.469  | 8.0057 | C | 2.1356 | 22.4614 | 8.0134 | C | 2.1522 | 22.4796 | 8.0091 |
| C     | 2.8693 | 21.2611 | 8.0064 | C | 2.8577 | 21.2511 | 8.0111 | C | 2.8736 | 21.2712 | 8.0073 |
| C     | 4.3159 | 21.2614 | 8.0064 | C | 4.3017 | 21.2514 | 8.0112 | C | 4.3185 | 21.2715 | 8.0075 |
| C     | 5.0359 | 22.4694 | 8.0059 | C | 5.024  | 22.4608 | 8.0133 | C | 5.0402 | 22.4803 | 8.0097 |
| C     | 6.4081 | 22.4694 | 8.0059 | C | 6.3947 | 22.4609 | 8.013  | C | 6.4116 | 22.4799 | 8.0097 |
| C     | 7.129  | 21.2616 | 8.0063 | C | 7.1177 | 21.2511 | 8.0109 | C | 7.1332 | 21.2715 | 8.0075 |
| C     | 0.0429 | 18.7895 | 8.0041 | C | 0.0292 | 18.7808 | 8.0077 | C | 0.0443 | 18.8003 | 8.0029 |
| C     | 0.7488 | 20.0322 | 8.0059 | C | 0.7353 | 20.0218 | 8.009  | C | 0.7513 | 20.0425 | 8.0049 |
| C     | 2.1768 | 20.0324 | 8.0059 | C | 2.1645 | 20.0226 | 8.0091 | C | 2.1798 | 20.0422 | 8.0049 |
| C     | 2.8828 | 18.79   | 8.0037 | C | 2.8702 | 18.7801 | 8.0074 | C | 2.885  | 18.8011 | 8.0023 |
| C     | 4.3031 | 18.7905 | 8.0035 | C | 4.2893 | 18.7803 | 8.0078 | C | 4.3047 | 18.8011 | 8.0023 |
| C     | 5.0084 | 20.0329 | 8.0056 | C | 4.995  | 20.0216 | 8.0095 | C | 5.011  | 20.043  | 8.0051 |
| C     | 6.4364 | 20.0329 | 8.0056 | C | 6.4238 | 20.0221 | 8.0094 | C | 6.4394 | 20.0428 | 8.0051 |
| C     | 7.1424 | 18.7905 | 8.004  | C | 7.1296 | 18.7795 | 8.0083 | C | 7.1444 | 18.8014 | 8.0031 |
| C     | 0.0459 | 16.3301 | 8.0021 | C | 0.0331 | 16.3193 | 8.009  | C | 0.0453 | 16.3399 | 8.0086 |
| C     | 0.7445 | 17.558  | 8.0018 | C | 0.7326 | 17.5459 | 8.0064 | C | 0.746  | 17.5682 | 8.0022 |
| C     | 2.1819 | 17.5583 | 8.0009 | C | 2.1672 | 17.5474 | 8.0056 | C | 2.1818 | 17.5681 | 8.0007 |
| C     | 2.8806 | 16.3311 | 7.996  | C | 2.8671 | 16.3188 | 8.0032 | C | 2.8796 | 16.3411 | 8      |
| C     | 4.3061 | 16.3318 | 7.9958 | C | 4.2934 | 16.3176 | 8.0037 | C | 4.3063 | 16.3405 | 8      |
| C     | 5.0043 | 17.5594 | 8.0003 | C | 4.9927 | 17.5457 | 8.0066 | C | 5.0061 | 17.5696 | 8.0007 |
| C     | 6.4413 | 17.5595 | 8.0016 | C | 6.4258 | 17.5468 | 8.0079 | C | 6.4408 | 17.5694 | 8.0024 |
| C     | 7.1403 | 16.3321 | 8.0023 | C | 7.1254 | 16.3158 | 8.0098 | C | 7.1392 | 16.3418 | 8.0087 |
| C     | 0.0523 | 13.8581 | 8.0228 | C | 0.0368 | 13.8501 | 8.0382 | C | 0.046  | 13.8684 | 8.0583 |
| C     | 0.7516 | 15.0878 | 8.0045 | C | 0.7389 | 15.0789 | 8.0156 | C | 0.7492 | 15.0988 | 8.0221 |

|            |         |         |         |   |        |         |        |   |         |         |        |
|------------|---------|---------|---------|---|--------|---------|--------|---|---------|---------|--------|
| C          | 2.1754  | 15.0892 | 7.9953  | C | 2.1624 | 15.0808 | 8.0064 | C | 2.173   | 15.0995 | 8.0105 |
| C          | 2.8748  | 13.861  | 7.9963  | C | 2.8659 | 13.8499 | 8.0142 | C | 2.8718  | 13.871  | 8.0278 |
| C          | 4.3123  | 13.8626 | 8.002   | C | 4.2975 | 13.8452 | 8.011  | C | 4.3074  | 13.8696 | 8.032  |
| C          | 5.0117  | 15.0916 | 7.9974  | C | 4.9985 | 15.0761 | 8.0054 | C | 5.0096  | 15.1022 | 8.0119 |
| C          | 6.4351  | 15.0917 | 8.0061  | C | 6.4208 | 15.0788 | 8.012  | C | 6.4326  | 15.1015 | 8.0227 |
| C          | 7.1354  | 13.8635 | 8.0253  | C | 7.1235 | 13.8422 | 8.0265 | C | 7.1326  | 13.873  | 8.0594 |
| C          | 0.0484  | 11.3797 | 8.047   | C | 0.0366 | 11.3824 | 8.0835 | C | 0.0403  | 11.3905 | 8.1079 |
| C          | 0.7528  | 12.6267 | 8.0357  | C | 0.7406 | 12.6209 | 8.0726 | C | 0.7462  | 12.6375 | 8.0901 |
| C          | 2.1741  | 12.6315 | 8.0197  | C | 2.1635 | 12.6238 | 8.0591 | C | 2.1676  | 12.6423 | 8.0746 |
| C          | 2.8783  | 11.3923 | 8.1037  | C | 2.8715 | 11.3859 | 8.1475 | C | 2.8688  | 11.4058 | 8.1604 |
| C          | 4.3048  | 11.3976 | 8.1252  | C | 4.3    | 11.3753 | 8.097  | C | 4.2946  | 11.4062 | 8.1758 |
| C          | 5.0125  | 12.6364 | 8.0418  | C | 4.9979 | 12.607  | 8.0288 | C | 5.0045  | 12.6447 | 8.0893 |
| C          | 6.4357  | 12.6365 | 8.0531  | C | 6.4269 | 12.6139 | 8.0315 | C | 6.431   | 12.6424 | 8.1005 |
| C          | 7.1426  | 11.3963 | 8.0742  | C | 7.1328 | 11.371  | 8.0451 | C | 7.133   | 11.4081 | 8.1252 |
| C          | 0.0102  | 8.9357  | 7.8423  | C | 0.0595 | 8.9309  | 7.9263 | C | 0.0029  | 8.9404  | 7.9209 |
| C          | 0.7431  | 10.1422 | 8.0306  | C | 0.751  | 10.1574 | 8.1406 | C | 0.7395  | 10.1602 | 8.1061 |
| C          | 2.1842  | 10.1629 | 8.2108  | C | 2.166  | 10.1841 | 8.3202 | C | 2.1695  | 10.176  | 8.2604 |
| C          | 2.9099  | 9.0079  | 8.5688  | C | 2.871  | 8.9512  | 8.6149 | C | 2.8917  | 9.0049  | 8.5669 |
| C          | 4.2897  | 9.0105  | 8.574   | C | 4.292  | 8.9583  | 8.4626 | C | 4.2695  | 9.0078  | 8.5837 |
| C          | 5.0017  | 10.1789 | 8.2564  | C | 4.9917 | 10.1173 | 8.1507 | C | 4.9865  | 10.1832 | 8.2998 |
| C          | 6.4443  | 10.171  | 8.1153  | C | 6.4489 | 10.1269 | 8.0295 | C | 6.429   | 10.1744 | 8.1608 |
| C          | 7.1432  | 8.9756  | 7.9286  | C | 7.1838 | 8.942   | 7.8826 | C | 7.1167  | 8.9821  | 7.9862 |
| H          | 2.3782  | 8.1047  | 8.8575  | H | 2.4995 | 8.3683  | 9.4687 | H | 2.357   | 8.096   | 8.8343 |
| H          | 4.8269  | 8.1017  | 8.8436  | H | 4.8408 | 8.0469  | 8.6998 | H | 4.8025  | 8.0945  | 8.8462 |
| H          | 6.5998  | 8.0428  | 7.7788  | H | 6.6738 | 7.9919  | 7.7236 | H | 6.5717  | 8.0491  | 7.8527 |
| H          | 0.2579  | 23.4239 | 8.0038  | H | 0.2466 | 23.4165 | 8.0167 | H | 0.2623  | 23.4352 | 8.0108 |
| H          | 2.6672  | 23.4244 | 8.0041  | H | 2.6549 | 23.4162 | 8.0168 | H | 2.6711  | 23.4347 | 8.0106 |
| H          | 4.5172  | 23.4245 | 8.0046  | H | 4.5059 | 23.4163 | 8.0163 | H | 4.5219  | 23.4357 | 8.0117 |
| H          | 6.9265  | 23.4248 | 8.0046  | H | 6.9138 | 23.4159 | 8.0159 | H | 6.9305  | 23.4351 | 8.0117 |
| H          | 1.5276  | 7.7418  | 6.8095  | H | 2.0745 | 8.0586  | 7.8177 | H | 1.2908  | 7.3982  | 6.587  |
| C          | 0.6363  | 7.6453  | 7.4538  | C | 0.7918 | 7.6968  | 7.6702 | C | 0.5315  | 7.6912  | 7.5275 |
| C          | 0.1978  | 6.4508  | 7.7644  | C | 0.568  | 6.4716  | 7.4248 | C | 0.6315  | 6.4218  | 7.2776 |
| H          | -0.1441 | 5.4788  | 8.059   | H | 0.9096 | 5.4734  | 7.2105 | H | 0.703   | 5.4535  | 7.7848 |
| A0+C2H2=C1 |         |         | C1=D1+H |   |        | B4=>A3  |        |   |         |         |        |
| C          | 0.0713  | 21.2403 | 8.0041  | C | 0.0596 | 21.2505 | 8.006  | C | -0.0101 | 21.2351 | 8.0057 |
| C          | 0.7915  | 22.448  | 8.0058  | C | 0.7804 | 22.4584 | 8.0091 | C | 0.7111  | 22.4442 | 8.0077 |
| C          | 2.1643  | 22.448  | 8.006   | C | 2.1529 | 22.4588 | 8.009  | C | 2.0825  | 22.4445 | 8.0075 |
| C          | 2.8845  | 21.2403 | 8.0045  | C | 2.873  | 21.2508 | 8.006  | C | 2.8048  | 21.2348 | 8.0059 |
| C          | 4.3318  | 21.2403 | 8.0044  | C | 4.3199 | 21.2512 | 8.0059 | C | 4.25    | 21.2327 | 8.0062 |
| C          | 5.0516  | 22.4481 | 8.0059  | C | 5.04   | 22.4593 | 8.0084 | C | 4.9718  | 22.4414 | 8.0084 |
| C          | 6.4241  | 22.4479 | 8.0058  | C | 6.4122 | 22.4593 | 8.0085 | C | 6.343   | 22.4421 | 8.0084 |
| C          | 7.144   | 21.2402 | 8.0041  | C | 7.1326 | 21.2512 | 8.006  | C | 7.0649  | 21.233  | 8.0059 |
| C          | 0.0582  | 18.7679 | 8.001   | C | 0.046  | 18.7782 | 8.0027 | C | -0.0218 | 18.7643 | 8.006  |
| C          | 0.7639  | 20.0111 | 8.0023  | C | 0.7521 | 20.0214 | 8.0035 | C | 0.683   | 20.0059 | 8.0044 |
| C          | 2.192   | 20.0112 | 8.0024  | C | 2.1803 | 20.0217 | 8.0037 | C | 2.1121  | 20.0062 | 8.0048 |
| C          | 2.898   | 18.768  | 8.0007  | C | 2.8859 | 18.7787 | 8.0023 | C | 2.8191  | 18.7634 | 8.0067 |
| C          | 4.319   | 18.7677 | 8.0007  | C | 4.3064 | 18.7794 | 8.0023 | C | 4.2392  | 18.7599 | 8.0066 |
| C          | 5.0241  | 20.0111 | 8.0023  | C | 5.0119 | 20.0223 | 8.0037 | C | 4.9439  | 20.0026 | 8.005  |
| C          | 6.452   | 20.011  | 8.0022  | C | 6.4399 | 20.0223 | 8.0037 | C | 6.3725  | 20.003  | 8.0048 |



|       |          |          |          |   |         |         |        |   |         |         |        |
|-------|----------|----------|----------|---|---------|---------|--------|---|---------|---------|--------|
| C     | 7.1572   | 18.7676  | 8.001    | C | 7.1453  | 18.7793 | 8.0028 | C | 7.0784  | 18.7596 | 8.0063 |
| C     | 0.0607   | 16.3091  | 8.0119   | C | 0.0478  | 16.3179 | 8.0148 | C | -0.0169 | 16.3064 | 8.0262 |
| C     | 0.7594   | 17.537   | 8.0025   | C | 0.7469  | 17.5463 | 8.0045 | C | 0.6816  | 17.5323 | 8.0136 |
| C     | 2.1971   | 17.5371  | 8.0015   | C | 2.1844  | 17.5469 | 8.0027 | C | 2.1174  | 17.5327 | 8.0143 |
| C     | 2.8963   | 16.3092  | 8.0066   | C | 2.8824  | 16.3191 | 8.0047 | C | 2.8195  | 16.3056 | 8.0286 |
| C     | 4.3214   | 16.3086  | 8.0069   | C | 4.308   | 16.3201 | 8.0047 | C | 4.2454  | 16.2962 | 8.0242 |
| C     | 5.0195   | 17.5366  | 8.0015   | C | 5.0069  | 17.5479 | 8.0025 | C | 4.9429  | 17.5253 | 8.0122 |
| C     | 6.457    | 17.5364  | 8.0025   | C | 6.4441  | 17.548  | 8.0045 | C | 6.3772  | 17.5256 | 8.0117 |
| C     | 7.1556   | 16.3083  | 8.0119   | C | 7.1424  | 16.3204 | 8.015  | C | 7.0763  | 16.2949 | 8.0212 |
| C     | 0.0669   | 13.8408  | 8.0767   | C | 0.0529  | 13.8453 | 8.0727 | C | -0.0103 | 13.8442 | 8.0653 |
| C     | 0.7664   | 15.0681  | 8.0329   | C | 0.7526  | 15.0752 | 8.0319 | C | 0.6906  | 15.0705 | 8.0531 |
| C     | 2.191    | 15.0681  | 8.0261   | C | 2.1765  | 15.0771 | 8.0188 | C | 2.1149  | 15.0705 | 8.0562 |
| C     | 2.8908   | 13.8404  | 8.0617   | C | 2.8747  | 13.8489 | 8.0388 | C | 2.8208  | 13.8429 | 8.0778 |
| C     | 4.3286   | 13.8392  | 8.0649   | C | 4.3126  | 13.8512 | 8.0459 | C | 4.2544  | 13.8171 | 8.049  |
| C     | 5.0267   | 15.0673  | 8.028    | C | 5.0129  | 15.0797 | 8.022  | C | 4.9517  | 15.0499 | 8.0323 |
| C     | 6.4508   | 15.0668  | 8.0342   | C | 6.4367  | 15.0803 | 8.0348 | C | 6.3741  | 15.0518 | 8.0276 |
| C     | 7.1495   | 13.8388  | 8.0794   | C | 7.1362  | 13.8526 | 8.0776 | C | 7.0743  | 13.8142 | 8.0331 |
| C     | 0.0607   | 11.371   | 8.1578   | C | 0.0479  | 11.3634 | 8.1164 | C | -0.033  | 11.3991 | 8.0184 |
| C     | 0.7684   | 12.6118  | 8.1193   | C | 0.7524  | 12.6126 | 8.0986 | C | 0.6916  | 12.6241 | 8.0886 |
| C     | 2.1906   | 12.612   | 8.1174   | C | 2.1731  | 12.6192 | 8.082  | C | 2.1224  | 12.6221 | 8.1005 |
| C     | 2.8979   | 11.3733  | 8.2132   | C | 2.8749  | 11.3798 | 8.1683 | C | 2.8523  | 11.3916 | 8.06   |
| C     | 4.3245   | 11.3703  | 8.2217   | C | 4.3014  | 11.3875 | 8.1967 | C | 4.2752  | 11.3233 | 7.9809 |
| C     | 5.0291   | 12.6101  | 8.1275   | C | 5.0114  | 12.6252 | 8.1085 | C | 4.9583  | 12.5722 | 8.0132 |
| C     | 6.45     | 12.6087  | 8.1314   | C | 6.4355  | 12.6261 | 8.1205 | C | 6.3759  | 12.5775 | 7.9994 |
| C     | 7.1534   | 11.3636  | 8.1749   | C | 7.1414  | 11.3862 | 8.1431 | C | 7.0673  | 11.3199 | 7.9475 |
| C     | 0.0144   | 8.9727   | 8.1206   | C | -0.0001 | 8.919   | 7.9338 | C | 0.1667  | 8.9534  | 7.7468 |
| C     | 0.7656   | 10.1406  | 8.2022   | C | 0.7425  | 10.1254 | 8.1053 | C | 0.7063  | 10.2273 | 7.9496 |
| C     | 2.2068   | 10.1484  | 8.3144   | C | 2.1839  | 10.1481 | 8.2612 | C | 2.1169  | 10.2237 | 8.0021 |
| C     | 2.9134   | 8.9561   | 8.552    | C | 2.9074  | 8.9834  | 8.582  | C | 2.6617  | 8.93    | 7.8064 |
| C     | 4.291    | 8.954    | 8.5605   | C | 4.2849  | 8.9933  | 8.6159 | C | 4.1033  | 8.8686  | 7.6882 |
| C     | 5.013    | 10.1413  | 8.3335   | C | 4.9959  | 10.1696 | 8.3292 | C | 4.9193  | 10.0263 | 7.8213 |
| C     | 6.4582   | 10.1342  | 8.2309   | C | 6.4373  | 10.1649 | 8.1863 | C | 6.4344  | 10.0349 | 7.8119 |
| C     | 7.1755   | 8.9169   | 8.1285   | C | 7.1268  | 8.9678  | 8.006  | C | 7.2773  | 8.867   | 7.6872 |
| H     | 2.3562   | 8.0369   | 8.729    | H | 2.3768  | 8.0645  | 8.8158 | H | 2.6103  | 6.7281  | 9.0876 |
| H     | 4.8197   | 8.0218   | 8.7524   | H | 4.8187  | 8.0805  | 8.8768 | H | 4.5861  | 7.9026  | 7.5309 |
| H     | 6.6553   | 7.9663   | 8.0168   | H | 6.5798  | 8.0362  | 7.8773 | H | 6.7963  | 7.8966  | 7.5481 |
| H     | 0.273    | 23.4034  | 8.0062   | H | 0.2618  | 23.4137 | 8.0121 | H | 0.192   | 23.3992 | 8.0098 |
| H     | 2.6826   | 23.4034  | 8.0067   | H | 2.6716  | 23.414  | 8.012  | H | 2.6009  | 23.3999 | 8.0092 |
| H     | 4.5329   | 23.4033  | 8.0067   | H | 4.5216  | 23.4147 | 8.0112 | H | 4.4522  | 23.3963 | 8.0103 |
| H     | 6.9428   | 23.4031  | 8.0064   | H | 6.9309  | 23.4145 | 8.0114 | H | 6.8613  | 23.3975 | 8.0108 |
| H     | 1.392    | 7.7103   | 6.3903   | H | 1.8997  | 8.1609  | 6.2481 | H | 1.4048  | 7.2393  | 6.8999 |
| C     | 0.8172   | 7.0323   | 6.9931   | C | 0.5094  | 7.6109  | 7.645  | C | 1.4033  | 7.9943  | 7.6942 |
| C     | 0.3366   | 5.9942   | 7.4209   | C | 0.5509  | 6.392   | 7.5282 | C | 1.8918  | 7.5432  | 9.0225 |
| H     | -0.1583  | 5.1775   | 7.9068   | H | 0.7086  | 5.357   | 7.3066 | H | 1.5389  | 8.0167  | 9.9345 |
| A1=B1 |          |          |          |   |         |         |        |   |         |         |        |
| C     | 0.04236  | 21.25718 | 8.004709 |   |         |         |        |   |         |         |        |
| C     | 0.762518 | 22.46512 | 8.003587 |   |         |         |        |   |         |         |        |
| C     | 2.135158 | 22.46548 | 8.003974 |   |         |         |        |   |         |         |        |
| C     | 2.855025 | 21.2576  | 8.005076 |   |         |         |        |   |         |         |        |

|   |          |          |          |
|---|----------|----------|----------|
| C | 4.30219  | 21.25779 | 8.005016 |
| C | 5.021472 | 22.46582 | 8.00505  |
| C | 6.394207 | 22.46578 | 8.004879 |
| C | 7.115061 | 21.25797 | 8.004796 |
| C | 0.030654 | 18.78442 | 8.003035 |
| C | 0.735514 | 20.02797 | 8.004496 |
| C | 2.16341  | 20.02834 | 8.004505 |
| C | 2.86954  | 18.78537 | 8.002465 |
| C | 4.290282 | 18.78591 | 8.00233  |
| C | 4.994994 | 20.02902 | 8.004158 |
| C | 6.422957 | 20.02886 | 8.00408  |
| C | 7.129596 | 18.78586 | 8.002869 |
| C | 0.035137 | 16.32308 | 8.001411 |
| C | 0.73243  | 17.55237 | 8.000871 |
| C | 2.170015 | 17.55321 | 7.999791 |
| C | 2.869291 | 16.32528 | 7.994599 |
| C | 4.294738 | 16.32655 | 7.994623 |
| C | 4.99195  | 17.55484 | 7.999735 |
| C | 6.429609 | 17.55451 | 8.001248 |
| C | 7.129703 | 16.32646 | 8.002372 |
| C | 0.04431  | 13.84797 | 8.016939 |
| C | 0.741554 | 15.07958 | 8.002121 |
| C | 2.165586 | 15.0825  | 7.992406 |
| C | 2.865575 | 13.85412 | 7.989786 |
| C | 4.303515 | 13.85738 | 7.993224 |
| C | 5.00146  | 15.08611 | 7.99422  |
| C | 6.425949 | 15.08546 | 8.004199 |
| C | 7.127379 | 13.85705 | 8.017001 |
| C | 0.045234 | 11.36126 | 8.029599 |
| C | 0.745549 | 12.6138  | 8.028455 |
| C | 2.16626  | 12.62314 | 8.013063 |
| C | 2.871327 | 11.38408 | 8.10044  |
| C | 4.299333 | 11.39266 | 8.105677 |
| C | 5.005494 | 12.63042 | 8.020893 |
| C | 6.42964  | 12.62893 | 8.027397 |
| C | 7.137554 | 11.38766 | 8.025548 |
| C | 0.005617 | 8.91216  | 7.796006 |
| C | 0.739495 | 10.1182  | 8.040216 |
| C | 2.18048  | 10.15616 | 8.239299 |
| C | 2.920907 | 9.026288 | 8.645571 |
| C | 4.298994 | 9.019654 | 8.600533 |
| C | 5.001728 | 10.17573 | 8.224038 |
| C | 6.437398 | 10.16582 | 8.041911 |
| C | 7.13483  | 8.969409 | 7.836578 |
| H | 2.408546 | 8.156324 | 9.041277 |
| H | 4.84436  | 8.122951 | 8.894086 |
| H | 6.579759 | 8.042235 | 7.698341 |
| H | 0.24344  | 23.42021 | 8.000989 |
| H | 2.653357 | 23.42095 | 8.001713 |

|   |            |          |          |   |        |         |         |   |         |         |         |
|---|------------|----------|----------|---|--------|---------|---------|---|---------|---------|---------|
| H | 4.502586   | 23.42095 | 8.0043   |   |        |         |         |   |         |         |         |
| H | 6.912587   | 23.42124 | 8.004083 |   |        |         |         |   |         |         |         |
| H | 1.468204   | 7.211802 | 7.932488 |   |        |         |         |   |         |         |         |
| C | 0.596492   | 7.595776 | 7.401383 |   |        |         |         |   |         |         |         |
| C | 0.137197   | 6.845072 | 6.421161 |   |        |         |         |   |         |         |         |
| H | -0.6239    | 6.845917 | 5.646221 |   |        |         |         |   |         |         |         |
|   | Z0+C2H2=Z1 |          |          |   | Z1=Z2  |         |         |   | Z2=Z3   |         |         |
| C | 0.0077     | -5.7321  | 0.1226   | C | 0.0207 | -5.7614 | 0.0717  | C | -0.0086 | -5.7608 | -0.0387 |
| C | 1.2378     | -5.0491  | 0.1      | C | 1.2506 | -5.0784 | 0.0683  | C | 1.2218  | -5.0783 | -0.0358 |
| C | 2.4676     | -5.7324  | 0.1231   | C | 2.4804 | -5.7612 | 0.0723  | C | 2.4518  | -5.7612 | -0.0403 |
| C | 3.6974     | -5.049   | 0.1001   | C | 3.7104 | -5.078  | 0.0692  | C | 3.6817  | -5.0779 | -0.0349 |
| C | 4.9277     | -5.732   | 0.1229   | C | 4.9407 | -5.7607 | 0.0731  | C | 4.9113  | -5.7612 | -0.0377 |
| C | 6.1579     | -5.049   | 0.1      | C | 6.1707 | -5.078  | 0.0692  | C | 6.1418  | -5.0789 | -0.0307 |
| C | 7.3877     | -5.7324  | 0.1231   | C | 7.4003 | -5.7613 | 0.072   | C | 7.3717  | -5.7619 | -0.0369 |
| C | 8.6175     | -5.049   | 0.1      | C | 8.6305 | -5.0784 | 0.0686  | C | 8.6009  | -5.0781 | -0.0319 |
| C | 1.2378     | -3.6097  | 0.0541   | C | 1.2505 | -3.6388 | 0.0604  | C | 1.2219  | -3.6386 | -0.0233 |
| C | 2.4673     | -2.9031  | 0.0326   | C | 2.4799 | -2.9322 | 0.054   | C | 2.452   | -2.9319 | -0.0156 |
| C | 3.6973     | -3.6096  | 0.0541   | C | 3.7104 | -3.6382 | 0.0602  | C | 3.6824  | -3.638  | -0.0207 |
| C | 4.9277     | -2.9034  | 0.0323   | C | 4.9411 | -2.932  | 0.0544  | C | 4.9126  | -2.9318 | -0.0045 |
| C | 6.1579     | -3.6097  | 0.054    | C | 6.171  | -3.6384 | 0.0611  | C | 6.1419  | -3.6392 | -0.0121 |
| C | 7.3877     | -2.9031  | 0.0326   | C | 7.401  | -2.932  | 0.0563  | C | 7.3707  | -2.932  | 0.0002  |
| C | 8.6175     | -3.6096  | 0.0542   | C | 8.6307 | -3.6386 | 0.0617  | C | 8.6005  | -3.6383 | -0.0147 |
| C | 0.0077     | -2.9031  | 0.0325   | C | 0.0209 | -2.9319 | 0.0563  | C | -0.0086 | -2.9323 | -0.0099 |
| C | 0.0076     | -1.4722  | -0.0084  | C | 0.021  | -1.5007 | 0.0393  | C | -0.0092 | -1.502  | 0.007   |
| C | 1.2375     | -0.7635  | -0.0251  | C | 1.2502 | -0.7915 | 0.0213  | C | 1.222   | -0.7939 | 0.002   |
| C | 2.4672     | -1.4724  | -0.0084  | C | 2.4795 | -1.5013 | 0.033   | C | 2.4528  | -1.5018 | -0.0013 |
| C | 3.6973     | -0.7643  | -0.0251  | C | 3.71   | -0.7939 | 0.0137  | C | 3.6844  | -0.7934 | 0.0121  |
| C | 4.9276     | -1.4726  | -0.0085  | C | 4.9414 | -1.501  | 0.0322  | C | 4.9138  | -1.4998 | 0.0169  |
| C | 6.1578     | -0.7643  | -0.0252  | C | 6.1724 | -0.7929 | 0.0181  | C | 6.1421  | -0.7865 | 0.0317  |
| C | 7.3878     | -1.4724  | -0.0084  | C | 7.4018 | -1.5009 | 0.0376  | C | 7.3697  | -1.5004 | 0.0236  |
| C | 8.6176     | -0.7635  | -0.025   | C | 8.6316 | -0.7912 | 0.0257  | C | 8.5987  | -0.7942 | 0.0245  |
| C | 1.2373     | 0.6663   | -0.0471  | C | 1.2498 | 0.6383  | -0.018  | C | 1.2218  | 0.634   | -0.0044 |
| C | 2.4673     | 1.3737   | -0.0531  | C | 2.4792 | 1.345   | -0.0543 | C | 2.4576  | 1.339   | -0.0153 |
| C | 3.6973     | 0.6652   | -0.0472  | C | 3.7095 | 0.6342  | -0.0342 | C | 3.6868  | 0.635   | 0.0101  |
| C | 4.9275     | 1.3733   | -0.0534  | C | 4.9422 | 1.3384  | -0.0587 | C | 4.911   | 1.3561  | 0.0261  |
| C | 6.1576     | 0.6651   | -0.0473  | C | 6.1741 | 0.6357  | -0.0267 | C | 6.1423  | 0.6468  | 0.0393  |
| C | 7.3873     | 1.3737   | -0.0531  | C | 7.4043 | 1.3479  | -0.0404 | C | 7.3732  | 1.3562  | 0.0397  |
| C | 8.6175     | 0.6665   | -0.0472  | C | 8.6328 | 0.6391  | -0.0099 | C | 8.5964  | 0.634   | 0.03    |
| C | 0.0075     | 1.3761   | -0.0531  | C | 0.0215 | 1.3512  | -0.0274 | C | -0.0145 | 1.3376  | 0.0077  |
| C | 0.0074     | 2.8084   | -0.058   | C | 0.0222 | 2.7843  | -0.0547 | C | -0.0188 | 2.7615  | -0.0052 |
| C | 1.24       | 3.5112   | -0.0572  | C | 1.2516 | 3.492   | -0.0918 | C | 1.2198  | 3.4362  | -0.0507 |
| C | 2.4685     | 2.8051   | -0.0577  | C | 2.4792 | 2.7752  | -0.1072 | C | 2.4612  | 2.7628  | -0.0411 |
| C | 3.6982     | 3.5113   | -0.057   | C | 3.7144 | 3.4702  | -0.1518 | C | 3.6794  | 3.5047  | -0.0173 |
| C | 4.9274     | 2.8042   | -0.0576  | C | 4.9431 | 2.7644  | -0.1182 | C | 4.9096  | 2.792   | 0.0213  |
| C | 6.1563     | 3.5116   | -0.0563  | C | 6.1712 | 3.4726  | -0.1327 | C | 6.1436  | 3.4986  | 0.0408  |
| C | 7.3858     | 2.8051   | -0.0571  | C | 7.4065 | 2.7799  | -0.084  | C | 7.376   | 2.7918  | 0.0399  |
| C | 8.6145     | 3.5108   | -0.0572  | C | 8.6352 | 3.4982  | -0.0735 | C | 8.6055  | 3.5066  | 0.026   |
| C | 1.2482     | 4.9608   | -0.0537  | C | 1.2632 | 4.9324  | -0.0951 | C | 1.2097  | 4.8337  | -0.0488 |
| C | 2.4753     | 5.6424   | -0.0526  | C | 2.4907 | 5.588   | -0.2242 | C | 2.3954  | 5.6191  | -0.0833 |

|         |         |         |         |       |         |         |         |       |         |         |         |
|---------|---------|---------|---------|-------|---------|---------|---------|-------|---------|---------|---------|
| C       | 3.6994  | 4.9503  | -0.0531 | C     | 3.7185  | 4.9019  | -0.2336 | C     | 3.6955  | 4.9537  | -0.0103 |
| C       | 4.9269  | 5.6335  | -0.0456 | C     | 4.9432  | 5.5878  | -0.2729 | C     | 4.9088  | 5.6218  | 0.0352  |
| C       | 6.1544  | 4.9507  | -0.047  | C     | 6.1681  | 4.9051  | -0.1966 | C     | 6.1464  | 4.9347  | 0.0468  |
| C       | 7.3791  | 5.6418  | -0.0354 | C     | 7.393   | 5.5958  | -0.1566 | C     | 7.3809  | 5.6219  | 0.0537  |
| C       | 8.6066  | 4.9606  | -0.0485 | C     | 8.63    | 4.9434  | -0.0657 | C     | 8.6006  | 4.957   | 0.0425  |
| C       | 0.0074  | 5.5899  | -0.0517 | C     | 0.0346  | 5.6603  | 0.0369  | C     | 0.0512  | 5.6296  | 0.0449  |
| H       | 0.0077  | -6.8242 | 0.1581  | H     | 0.0206  | -6.8538 | 0.0777  | H     | -0.0088 | -6.8533 | -0.0433 |
| H       | 2.4676  | -6.8244 | 0.1588  | H     | 2.4805  | -6.8536 | 0.0787  | H     | 2.452   | -6.8538 | -0.0439 |
| H       | 4.9277  | -6.824  | 0.1584  | H     | 4.9408  | -6.8532 | 0.0794  | H     | 4.9109  | -6.8537 | -0.0429 |
| H       | 7.3878  | -6.8244 | 0.1588  | H     | 7.4002  | -6.8537 | 0.0777  | H     | 7.372   | -6.8544 | -0.0435 |
| H       | 2.4711  | 6.7323  | -0.0499 | H     | 2.5046  | 6.6743  | -0.3136 | H     | 2.2697  | 6.3844  | -1.1143 |
| H       | 4.9262  | 6.7259  | -0.0373 | H     | 4.9409  | 6.6789  | -0.331  | H     | 4.9249  | 6.7147  | 0.0437  |
| H       | 7.3764  | 6.7319  | -0.0022 | H     | 7.3436  | 6.6831  | -0.2063 | H     | 7.3662  | 6.7144  | 0.0554  |
| H       | -0.4419 | 7.9774  | -1.0041 | H     | -0.9928 | 7.5298  | 0.3696  | H     | -0.1523 | 7.8652  | 0.1079  |
| C       | -0.0105 | 8.0414  | -0.0246 | C     | 0.0138  | 7.0853  | 0.3592  | C     | 0.4785  | 6.98    | 0.0796  |
| C       | 0.455   | 8.4712  | 1.0176  | C     | 0.9872  | 7.9034  | 0.718   | C     | 1.8926  | 7.0296  | 0.0162  |
| H       | 0.8869  | 8.6768  | 1.9762  | H     | 1.7876  | 8.5461  | 1.0277  | H     | 2.5265  | 7.9078  | 0.1067  |
| Z3=Z4+H |         |         |         | Z1=Y1 |         |         |         | Y1=Y2 |         |         |         |
| C1      | -0.0083 | -5.7544 | -0.0846 | C1    | 0.0096  | -5.7423 | 0.1616  | C1    | 0.008   | -5.7378 | 0.1223  |
| C       | 1.2223  | -5.0711 | -0.0727 | C     | 1.2396  | -5.0599 | 0.1301  | C     | 1.2382  | -5.0549 | 0.1014  |
| C1      | 2.4523  | -5.755  | -0.0843 | C1    | 2.4694  | -5.7425 | 0.1612  | C1    | 2.4677  | -5.738  | 0.1225  |
| C       | 3.6818  | -5.0713 | -0.0735 | C     | 3.6992  | -5.0594 | 0.1299  | C     | 3.6977  | -5.0546 | 0.1009  |
| C1      | 4.912   | -5.7551 | -0.0863 | C1    | 4.9296  | -5.7416 | 0.1616  | C1    | 4.9279  | -5.7375 | 0.1219  |
| C       | 6.1423  | -5.0724 | -0.0745 | C     | 6.1597  | -5.0593 | 0.1301  | C     | 6.1582  | -5.0547 | 0.1007  |
| C1      | 7.3721  | -5.7558 | -0.0856 | C1    | 7.3894  | -5.7425 | 0.1617  | C1    | 7.3881  | -5.738  | 0.1225  |
| C       | 8.6016  | -5.0714 | -0.0734 | C     | 8.6193  | -5.0599 | 0.1303  | C     | 8.6178  | -5.0548 | 0.1014  |
| C       | 1.222   | -3.6318 | -0.0487 | C     | 1.2392  | -3.6214 | 0.0649  | C     | 1.2385  | -3.6154 | 0.0588  |
| C       | 2.4524  | -2.9249 | -0.0358 | C     | 2.4684  | -2.9151 | 0.0359  | C     | 2.4676  | -2.909  | 0.0383  |
| C       | 3.6822  | -3.6312 | -0.0493 | C     | 3.6988  | -3.6208 | 0.0645  | C     | 3.698   | -3.6153 | 0.0579  |
| C       | 4.9131  | -2.9246 | -0.0364 | C     | 4.9292  | -2.915  | 0.0353  | C     | 4.9288  | -2.9096 | 0.0367  |
| C       | 6.142   | -3.6323 | -0.0498 | C     | 6.1597  | -3.6209 | 0.0644  | C     | 6.1589  | -3.6155 | 0.0574  |
| C       | 7.3703  | -2.9245 | -0.0364 | C     | 7.3897  | -2.9151 | 0.0356  | C     | 7.3893  | -2.909  | 0.0374  |
| C       | 8.6008  | -3.6313 | -0.0492 | C     | 8.6192  | -3.6213 | 0.0649  | C     | 8.6183  | -3.6152 | 0.0584  |
| C       | -0.0091 | -2.9251 | -0.0356 | C     | 0.0093  | -2.915  | 0.0362  | C     | 0.0087  | -2.9082 | 0.0385  |
| C       | -0.0106 | -1.4949 | -0.0053 | C     | 0.0089  | -1.4843 | -0.0139 | C     | 0.0093  | -1.4776 | -0.0012 |
| C       | 1.2213  | -0.786  | 0.0104  | C     | 1.238   | -0.7751 | -0.0317 | C     | 1.2388  | -0.7681 | -0.0181 |
| C       | 2.4531  | -1.4949 | -0.0057 | C     | 2.4673  | -1.4849 | -0.0142 | C     | 2.4676  | -1.4784 | -0.0013 |
| C       | 3.6837  | -0.7872 | 0.0095  | C     | 3.6971  | -0.7775 | -0.033  | C     | 3.6986  | -0.772  | -0.0203 |
| C       | 4.9141  | -1.4932 | -0.0063 | C     | 4.9289  | -1.4847 | -0.0154 | C     | 4.9296  | -1.4791 | -0.0039 |
| C       | 6.1413  | -0.7791 | 0.0092  | C     | 6.1601  | -0.7774 | -0.0342 | C     | 6.1608  | -0.7716 | -0.0217 |
| C       | 7.3685  | -1.4933 | -0.0062 | C     | 7.39    | -1.4849 | -0.0155 | C     | 7.3908  | -1.4783 | -0.0031 |
| C       | 8.5981  | -0.7873 | 0.01    | C     | 8.6194  | -0.7752 | -0.0332 | C     | 8.6201  | -0.7679 | -0.0197 |
| C       | 1.2208  | 0.6388  | 0.0368  | C     | 1.2367  | 0.6553  | -0.0522 | C     | 1.2389  | 0.6622  | -0.0421 |
| C       | 2.4576  | 1.3437  | 0.0459  | C     | 2.4653  | 1.3632  | -0.057  | C     | 2.4691  | 1.367   | -0.0483 |
| C       | 3.6855  | 0.641   | 0.036   | C     | 3.6955  | 0.6513  | -0.0547 | C     | 3.6989  | 0.6559  | -0.0451 |
| C       | 4.9097  | 1.3647  | 0.0455  | C     | 4.9281  | 1.3544  | -0.061  | C     | 4.9313  | 1.3597  | -0.0544 |
| C       | 6.1406  | 0.6551  | 0.0357  | C     | 6.1608  | 0.6514  | -0.0568 | C     | 6.1628  | 0.6565  | -0.0473 |
| C       | 7.3709  | 1.3646  | 0.0459  | C     | 7.3906  | 1.3631  | -0.0619 | C     | 7.3924  | 1.3688  | -0.0535 |
| C       | 8.595   | 0.6409  | 0.0364  | C     | 8.6198  | 0.6553  | -0.0553 | C     | 8.6216  | 0.6627  | -0.0451 |

|         |         |         |         |    |         |         |         |    |         |         |         |
|---------|---------|---------|---------|----|---------|---------|---------|----|---------|---------|---------|
| C       | -0.0172 | 1.3435  | 0.046   | C  | 0.0082  | 1.3681  | -0.0572 | C  | 0.0106  | 1.377   | -0.0506 |
| C       | -0.0244 | 2.7659  | 0.0579  | C  | 0.0076  | 2.802   | -0.0555 | C  | 0.0116  | 2.8099  | -0.053  |
| C       | 1.2197  | 3.4464  | 0.0605  | C  | 1.2355  | 3.5127  | -0.0413 | C  | 1.2465  | 3.5134  | -0.0365 |
| C       | 2.4637  | 2.7663  | 0.0581  | C  | 2.4635  | 2.7949  | -0.0528 | C  | 2.4715  | 2.797   | -0.0444 |
| C       | 3.6717  | 3.5114  | 0.0645  | C  | 3.6988  | 3.4886  | -0.0516 | C  | 3.7064  | 3.494   | -0.0443 |
| C       | 4.907   | 2.8013  | 0.0606  | C  | 4.9274  | 2.7814  | -0.0613 | C  | 4.9325  | 2.7861  | -0.0571 |
| C       | 6.14    | 3.5049  | 0.0685  | C  | 6.1557  | 3.4883  | -0.063  | C  | 6.1585  | 3.4961  | -0.0553 |
| C       | 7.3723  | 2.8009  | 0.061   | C  | 7.3913  | 2.7949  | -0.0656 | C  | 7.3929  | 2.7998  | -0.0575 |
| C       | 8.6069  | 3.511   | 0.0645  | C  | 8.6192  | 3.5125  | -0.0616 | C  | 8.618   | 3.5181  | -0.0533 |
| C       | 1.2188  | 4.8316  | 0.0657  | C  | 1.2434  | 4.9557  | -0.0101 | C  | 1.2759  | 4.9497  | -0.0057 |
| C2      | 2.3918  | 5.6298  | 0.0747  | C2 | 2.4791  | 5.6124  | -0.0328 | C2 | 2.486   | 5.6117  | 0.0354  |
| C       | 3.6643  | 4.9704  | 0.0762  | C  | 3.7024  | 4.9226  | -0.0461 | C  | 3.7161  | 4.926   | -0.0103 |
| C2      | 4.9028  | 5.6317  | 0.091   | C2 | 4.9268  | 5.6082  | -0.044  | C2 | 4.9323  | 5.6118  | -0.0044 |
| C       | 6.14    | 4.9454  | 0.0859  | C  | 6.151   | 4.9218  | -0.0466 | C  | 6.1506  | 4.9292  | -0.0303 |
| C2      | 7.3754  | 5.6316  | 0.0929  | C2 | 7.3735  | 5.6118  | -0.015  | C2 | 7.3816  | 5.614   | -0.008  |
| C       | 8.6141  | 4.9693  | 0.0756  | C  | 8.6128  | 4.9559  | -0.0379 | C  | 8.594   | 4.9567  | -0.0374 |
| C2      | 0.0465  | 5.6275  | 0.0708  | C2 | 0.0088  | 5.6772  | 0.0098  | C2 | 0.0147  | 5.6744  | -0.0461 |
| H       | -0.0081 | -6.8467 | -0.1041 | H  | 0.0097  | -6.8338 | 0.2119  | H  | 0.0077  | -6.83   | 0.1547  |
| H       | 2.4525  | -6.8472 | -0.1037 | H  | 2.4698  | -6.8339 | 0.2113  | H  | 2.4675  | -6.8302 | 0.155   |
| H       | 4.9116  | -6.8474 | -0.1063 | H  | 4.9298  | -6.833  | 0.2119  | H  | 4.9276  | -6.8296 | 0.1549  |
| H       | 7.3727  | -6.848  | -0.1054 | H  | 7.3894  | -6.8338 | 0.2122  | H  | 7.3878  | -6.8302 | 0.1556  |
| H       | 2.2605  | 7.4517  | -2.5051 | H  | 2.5017  | 6.7018  | -0.0505 | H  | 2.5188  | 6.6999  | 0.1147  |
| H       | 4.9175  | 6.7239  | 0.1064  | H  | 4.9265  | 6.7006  | -0.0326 | H  | 4.929   | 6.7043  | 0.0141  |
| H       | 7.3613  | 6.7237  | 0.1113  | H  | 7.3247  | 6.6975  | 0.0498  | H  | 7.3426  | 6.7052  | 0.061   |
| H       | -0.1009 | 7.888   | 0.0812  | H  | -0.9321 | 7.5865  | -0.4025 | H  | -0.8291 | 7.7763  | -0.1086 |
| C       | 0.5196  | 6.994   | 0.0785  | C  | -0.0377 | 7.1467  | 0.0708  | C  | 0.107   | 7.0342  | -0.0656 |
| C       | 1.9167  | 6.9956  | 0.0796  | C  | 0.8073  | 7.9884  | 0.6238  | C  | 0.5636  | 8.2317  | -0.407  |
| H       | 2.5359  | 7.8899  | 0.1012  | H  | 1.4824  | 8.6691  | 1.1031  | H  | 0.6295  | 9.0335  | 0.3503  |
| Y2=Y3+H |         |         | Y1=Y3+H |    |         | Y1=X1   |         |    |         |         |         |
| C       | -0.0003 | -5.7313 | 0.0691  | C  | 0.0214  | -5.7575 | 0.1657  | C  | 0.013   | -5.7511 | 0.122   |
| C       | 1.2299  | -5.048  | 0.0651  | C  | 1.2512  | -5.0752 | 0.1349  | C  | 1.2427  | -5.0686 | 0.0981  |
| C       | 2.4596  | -5.7318 | 0.0688  | C  | 2.481   | -5.7574 | 0.1657  | C  | 2.4728  | -5.7513 | 0.1221  |
| C       | 3.6894  | -5.0479 | 0.065   | C  | 3.7111  | -5.0749 | 0.1344  | C  | 3.7024  | -5.0685 | 0.0979  |
| C       | 4.9196  | -5.7312 | 0.069   | C  | 4.9414  | -5.757  | 0.1654  | C  | 4.933   | -5.751  | 0.1216  |
| C       | 6.1499  | -5.0479 | 0.0649  | C  | 6.1714  | -5.0747 | 0.1343  | C  | 6.1628  | -5.0687 | 0.0976  |
| C       | 7.3797  | -5.7318 | 0.0687  | C  | 7.4009  | -5.7575 | 0.1654  | C  | 7.3929  | -5.7516 | 0.122   |
| C       | 8.6094  | -5.048  | 0.065   | C  | 8.6311  | -5.0753 | 0.1346  | C  | 8.6223  | -5.0687 | 0.0981  |
| C       | 1.2299  | -3.6079 | 0.0569  | C  | 1.2511  | -3.6369 | 0.0701  | C  | 1.2406  | -3.6299 | 0.0501  |
| C       | 2.4595  | -2.9011 | 0.0519  | C  | 2.4805  | -2.9308 | 0.0411  | C  | 2.4694  | -2.924  | 0.0272  |
| C       | 3.6894  | -3.6078 | 0.0567  | C  | 3.7109  | -3.6364 | 0.0697  | C  | 3.7003  | -3.6296 | 0.0497  |
| C       | 4.9198  | -2.9012 | 0.0516  | C  | 4.9415  | -2.9306 | 0.0405  | C  | 4.9301  | -2.9238 | 0.0267  |
| C       | 6.1501  | -3.6078 | 0.0567  | C  | 6.1715  | -3.6364 | 0.0694  | C  | 6.1608  | -3.6299 | 0.0494  |
| C       | 7.3801  | -2.9011 | 0.0519  | C  | 7.4016  | -2.9308 | 0.0409  | C  | 7.3897  | -2.924  | 0.027   |
| C       | 8.6096  | -3.6079 | 0.0568  | C  | 8.6314  | -3.6368 | 0.0701  | C  | 8.6203  | -3.6297 | 0.05    |
| C       | -0.0002 | -2.901  | 0.0518  | C  | 0.0215  | -2.9306 | 0.0415  | C  | 0.0099  | -2.9238 | 0.0275  |
| C       | -0.0001 | -1.4696 | 0.0361  | C  | 0.0216  | -1.5    | -0.0089 | C  | 0.0068  | -1.4936 | -0.0142 |
| C       | 1.2297  | -0.7606 | 0.0245  | C  | 1.2507  | -0.7907 | -0.0283 | C  | 1.2358  | -0.785  | -0.0308 |
| C       | 2.4593  | -1.47   | 0.0363  | C  | 2.4799  | -1.5006 | -0.0098 | C  | 2.4662  | -1.494  | -0.0151 |
| C       | 3.6892  | -0.7621 | 0.0246  | C  | 3.71    | -0.7931 | -0.0295 | C  | 3.6953  | -0.7864 | -0.0317 |

|       |         |         |            |   |         |            |         |   |         |         |         |
|-------|---------|---------|------------|---|---------|------------|---------|---|---------|---------|---------|
| C     | 4.9199  | -1.47   | 0.036      | C | 4.9416  | -1.5003    | -0.0107 | C | 4.9273  | -1.4934 | -0.0154 |
| C     | 6.1508  | -0.762  | 0.0246     | C | 6.1727  | -0.7929    | -0.0299 | C | 6.1569  | -0.785  | -0.0317 |
| C     | 7.3805  | -1.47   | 0.0363     | C | 7.4024  | -1.5005    | -0.01   | C | 7.3869  | -1.4938 | -0.0151 |
| C     | 8.6101  | -0.7606 | 0.0245     | C | 8.6322  | -0.7908    | -0.0281 | C | 8.6155  | -0.7855 | -0.0303 |
| C     | 1.2295  | 0.6691  | -0.0045    | C | 1.2501  | 0.6397     | -0.0506 | C | 1.232   | 0.6443  | -0.0495 |
| C     | 2.4591  | 1.3768  | -0.0185    | C | 2.4788  | 1.348      | -0.057  | C | 2.4613  | 1.3519  | -0.0552 |
| C     | 3.6888  | 0.6669  | -0.0037    | C | 3.709   | 0.6359     | -0.0534 | C | 3.6919  | 0.6423  | -0.0522 |
| C     | 4.9202  | 1.3727  | -0.0179    | C | 4.9418  | 1.3394     | -0.0592 | C | 4.9218  | 1.3494  | -0.0566 |
| C     | 6.1515  | 0.6669  | -0.0038    | C | 6.174   | 0.636      | -0.0535 | C | 6.1546  | 0.6445  | -0.0515 |
| C     | 7.3812  | 1.377   | -0.0186    | C | 7.404   | 1.3481     | -0.0566 | C | 7.3836  | 1.3551  | -0.053  |
| C     | 8.6106  | 0.6692  | -0.0045    | C | 8.6332  | 0.6398     | -0.0503 | C | 8.6122  | 0.6438  | -0.0481 |
| C     | 0.0001  | 1.3798  | -0.0196    | C | 0.022   | 1.3524     | -0.0531 | C | 0.0002  | 1.3533  | -0.0495 |
| C     | 0.0003  | 2.8115  | -0.0453    | C | 0.0221  | 2.7863     | -0.0453 | C | -0.0047 | 2.784   | -0.0373 |
| C     | 1.2304  | 3.5195  | -0.0547    | C | 1.2499  | 3.4977     | -0.0394 | C | 1.225   | 3.4858  | -0.0336 |
| C     | 2.4593  | 2.8075  | -0.0424    | C | 2.4785  | 2.78       | -0.0547 | C | 2.4584  | 2.7824  | -0.0522 |
| C     | 3.6914  | 3.5082  | -0.0502    | C | 3.7138  | 3.474      | -0.0539 | C | 3.6895  | 3.4862  | -0.0515 |
| C     | 4.9204  | 2.8013  | -0.0409    | C | 4.9421  | 2.7662     | -0.0599 | C | 4.9195  | 2.7789  | -0.0565 |
| C     | 6.1495  | 3.5086  | -0.0503    | C | 6.1697  | 3.4738     | -0.0535 | C | 6.1475  | 3.486   | -0.0478 |
| C     | 7.3815  | 2.8079  | -0.0425    | C | 7.4054  | 2.7802     | -0.0536 | C | 7.3819  | 2.7874  | -0.0465 |
| C     | 8.6105  | 3.52    | -0.0548    | C | 8.6346  | 3.4972     | -0.0376 | C | 8.6095  | 3.5013  | -0.0247 |
| C     | 1.2415  | 4.957   | -0.0784    | C | 1.262   | 4.9389     | -0.0018 | C | 1.2279  | 4.9212  | 0.0091  |
| C     | 2.4674  | 5.6325  | -0.0782    | C | 2.4957  | 5.5981     | -0.0078 | C | 2.4521  | 5.5757  | 0.0013  |
| C     | 3.694   | 4.9447  | -0.0642    | C | 3.7178  | 4.9077     | -0.0376 | C | 3.6945  | 4.9304  | -0.0341 |
| C     | 4.9205  | 5.6297  | -0.0677    | C | 4.9417  | 5.5957     | -0.0335 | C | 4.919   | 5.6132  | -0.0334 |
| C     | 6.1472  | 4.9453  | -0.0643    | C | 6.1649  | 4.9076     | -0.0371 | C | 6.1433  | 4.9214  | -0.0344 |
| C     | 7.374   | 5.6333  | -0.0785    | C | 7.3874  | 5.5948     | -0.0065 | C | 7.3688  | 5.608   | -0.003  |
| C     | 8.5999  | 4.9579  | -0.0786    | C | 8.6227  | 4.9402     | 0.0009  | C | 8.6026  | 4.9447  | 0.0189  |
| C     | 0.0009  | 5.6693  | -0.104     | C | 0.0174  | 5.6623     | 0.0471  | C | 0.0027  | 5.6554  | 0.0715  |
| H     | -0.0004 | -6.8239 | 0.0764     | H | 0.0213  | -6.8488    | 0.2156  | H | 0.0141  | -6.8429 | 0.1595  |
| H     | 2.4597  | -6.8244 | 0.0761     | H | 2.4812  | -6.8487    | 0.2156  | H | 2.4741  | -6.843  | 0.1599  |
| H     | 4.9196  | -6.8238 | 0.0763     | H | 4.9415  | -6.8483    | 0.2153  | H | 4.9342  | -6.8427 | 0.1597  |
| H     | 7.3795  | -6.8244 | 0.0759     | H | 7.4006  | -6.8488    | 0.2152  | H | 7.3942  | -6.8433 | 0.1598  |
| H     | 2.4708  | 6.7233  | -0.0914    | H | 2.5175  | 6.6869     | 0.0168  | H | 2.2085  | 6.8954  | 0.0714  |
| H     | 4.9201  | 6.7218  | -0.0774    | H | 4.9428  | 6.6877     | -0.0148 | H | 4.9187  | 6.7048  | -0.0167 |
| H     | 7.3706  | 6.7243  | -0.0919    | H | 7.3748  | 6.6925     | 0.0212  | H | 7.3319  | 6.6969  | -0.0006 |
| H     | 0.0469  | 9.3242  | -2.8865    | H | -1.5994 | 8.0155     | 0.1721  | H | -0.8706 | 7.6457  | 0.3295  |
| C     | 0.0052  | 7.078   | -0.1622    | C | 0.1081  | 7.0824     | 0.1551  | C | 0.0689  | 7.0987  | 0.1973  |
| C     | 0.018   | 8.2949  | -0.2292    | C | 0.6819  | 8.1702     | 0.2644  | C | 1.2268  | 7.7774  | 0.1866  |
| H     | 0.0272  | 9.3642  | -0.2441    | H | 0.9295  | 9.2085     | 0.3582  | H | 1.3907  | 8.85    | 0.2913  |
| X1=Z3 |         |         | Z0+C2H2=Y1 |   |         | Z0+C2H2=Z1 |         |   |         |         |         |
| C     | 0.027   | -5.7767 | 0.0657     | C | -0.0059 | -5.7257    | 0.1754  | C | 0.0084  | -5.7319 | 0.1188  |
| C     | 1.2567  | -5.0937 | 0.0545     | C | 1.2242  | -5.0428    | 0.1443  | C | 1.2384  | -5.0488 | 0.0966  |
| C     | 2.4865  | -5.7767 | 0.0651     | C | 2.4542  | -5.7259    | 0.1748  | C | 2.4682  | -5.7322 | 0.1191  |
| C     | 3.7168  | -5.0937 | 0.0537     | C | 3.6839  | -5.0426    | 0.1444  | C | 3.6981  | -5.0488 | 0.0966  |
| C     | 4.947   | -5.7765 | 0.0647     | C | 4.9142  | -5.7252    | 0.1755  | C | 4.9284  | -5.7317 | 0.1188  |
| C     | 6.1767  | -5.0934 | 0.0541     | C | 6.1445  | -5.0425    | 0.1445  | C | 6.1585  | -5.0488 | 0.0965  |
| C     | 7.4065  | -5.7766 | 0.0653     | C | 7.3743  | -5.7259    | 0.1752  | C | 7.3883  | -5.7322 | 0.1192  |
| C     | 8.6366  | -5.0938 | 0.0547     | C | 8.604   | -5.0427    | 0.1446  | C | 8.6181  | -5.0488 | 0.0967  |
| C     | 1.2565  | -3.6538 | 0.0278     | C | 1.224   | -3.6039    | 0.0805  | C | 1.2384  | -3.6094 | 0.052   |

|   |         |         |         |   |         |         |         |   |         |         |         |
|---|---------|---------|---------|---|---------|---------|---------|---|---------|---------|---------|
| C | 2.4859  | -2.9471 | 0.0111  | C | 2.4536  | -2.8974 | 0.0525  | C | 2.4679  | -2.9028 | 0.0309  |
| C | 3.7166  | -3.6537 | 0.027   | C | 3.6837  | -3.6038 | 0.0802  | C | 3.6979  | -3.6093 | 0.0519  |
| C | 4.9467  | -2.947  | 0.0108  | C | 4.914   | -2.8976 | 0.0523  | C | 4.9282  | -2.9031 | 0.0304  |
| C | 6.1767  | -3.6537 | 0.0274  | C | 6.1444  | -3.6037 | 0.0804  | C | 6.1585  | -3.6094 | 0.0516  |
| C | 7.4065  | -2.9468 | 0.0114  | C | 7.3744  | -2.8973 | 0.0526  | C | 7.3882  | -2.9028 | 0.0306  |
| C | 8.6365  | -3.6536 | 0.0279  | C | 8.604   | -3.6039 | 0.0806  | C | 8.618   | -3.6093 | 0.0519  |
| C | 0.0268  | -2.9467 | 0.0116  | C | -0.0061 | -2.8973 | 0.0528  | C | 0.0083  | -2.9028 | 0.0308  |
| C | 0.0265  | -1.5154 | -0.0228 | C | -0.0063 | -1.4664 | 0.0044  | C | 0.0081  | -1.4719 | -0.0096 |
| C | 1.2557  | -0.8055 | -0.0375 | C | 1.2233  | -0.7574 | -0.0151 | C | 1.2379  | -0.7632 | -0.0258 |
| C | 2.4852  | -1.5157 | -0.0229 | C | 2.453   | -1.4668 | 0.004   | C | 2.4676  | -1.472  | -0.0095 |
| C | 3.7155  | -0.807  | -0.037  | C | 3.683   | -0.7591 | -0.0157 | C | 3.6977  | -0.764  | -0.026  |
| C | 4.9463  | -1.5154 | -0.0232 | C | 4.9138  | -1.4669 | 0.0037  | C | 4.9281  | -1.4723 | -0.0099 |
| C | 6.1761  | -0.8057 | -0.0379 | C | 6.1445  | -0.7587 | -0.0156 | C | 6.1582  | -0.764  | -0.0264 |
| C | 7.4063  | -1.515  | -0.0231 | C | 7.3746  | -1.4666 | 0.0041  | C | 7.3882  | -1.472  | -0.0099 |
| C | 8.6361  | -0.8056 | -0.037  | C | 8.6041  | -0.7572 | -0.015  | C | 8.618   | -0.7632 | -0.0261 |
| C | 1.2547  | 0.6257  | -0.0551 | C | 1.2226  | 0.673   | -0.0413 | C | 1.2377  | 0.6667  | -0.0472 |
| C | 2.4841  | 1.3346  | -0.0548 | C | 2.4526  | 1.3796  | -0.0488 | C | 2.4675  | 1.3741  | -0.0528 |
| C | 3.7142  | 0.6231  | -0.0531 | C | 3.6825  | 0.67    | -0.042  | C | 3.6975  | 0.6655  | -0.0474 |
| C | 4.9434  | 1.3323  | -0.0572 | C | 4.9132  | 1.3765  | -0.0488 | C | 4.9277  | 1.3736  | -0.0534 |
| C | 6.1755  | 0.6249  | -0.0564 | C | 6.1447  | 0.6708  | -0.0418 | C | 6.1578  | 0.6654  | -0.0477 |
| C | 7.4057  | 1.3352  | -0.0604 | C | 7.3748  | 1.3805  | -0.0486 | C | 7.3875  | 1.3739  | -0.0532 |
| C | 8.6355  | 0.6254  | -0.0556 | C | 8.6042  | 0.6731  | -0.0411 | C | 8.6178  | 0.6668  | -0.0475 |
| C | 0.0249  | 1.3374  | -0.0598 | C | -0.0068 | 1.3841  | -0.0476 | C | 0.0078  | 1.3764  | -0.0531 |
| C | 0.0229  | 2.7705  | -0.0501 | C | -0.007  | 2.8177  | -0.0516 | C | 0.0076  | 2.8087  | -0.0575 |
| C | 1.2537  | 3.4745  | -0.024  | C | 1.2252  | 3.52    | -0.0519 | C | 1.2401  | 3.5115  | -0.0561 |
| C | 2.4825  | 2.7669  | -0.0353 | C | 2.4532  | 2.811   | -0.0539 | C | 2.4686  | 2.8054  | -0.0566 |
| C | 3.7119  | 3.4752  | -0.0213 | C | 3.6842  | 3.5132  | -0.0542 | C | 3.6982  | 3.5117  | -0.0553 |
| C | 4.941   | 2.7639  | -0.0488 | C | 4.9127  | 2.8059  | -0.0541 | C | 4.9274  | 2.8046  | -0.0567 |
| C | 6.1703  | 3.4691  | -0.0543 | C | 6.1413  | 3.5126  | -0.0545 | C | 6.1563  | 3.5118  | -0.0552 |
| C | 7.4046  | 2.7675  | -0.0594 | C | 7.3739  | 2.8126  | -0.054  | C | 7.3858  | 2.8052  | -0.0566 |
| C | 8.6317  | 3.4825  | -0.0418 | C | 8.6018  | 3.5226  | -0.0518 | C | 8.6144  | 3.5108  | -0.0566 |
| C | 1.2626  | 4.9169  | 0.062   | C | 1.2343  | 4.9708  | -0.0468 | C | 1.2482  | 4.961   | -0.0517 |
| C | 2.4694  | 5.564   | 0.2654  | C | 2.4644  | 5.6426  | -0.0477 | C | 2.4751  | 5.643   | -0.0484 |
| C | 3.7127  | 4.9252  | 0.0661  | C | 3.686   | 4.9504  | -0.0515 | C | 3.6993  | 4.9508  | -0.0495 |
| C | 4.9422  | 5.5973  | 0.034   | C | 4.912   | 5.6333  | -0.0522 | C | 4.9268  | 5.6337  | -0.0413 |
| C | 6.163   | 4.904   | -0.0482 | C | 6.1376  | 4.949   | -0.0565 | C | 6.1542  | 4.9508  | -0.0444 |
| C | 7.3939  | 5.5885  | -0.0621 | C | 7.3596  | 5.641   | -0.0633 | C | 7.3789  | 5.6417  | -0.0329 |
| C | 8.6165  | 4.9227  | -0.0211 | C | 8.5955  | 4.9755  | -0.0521 | C | 8.6062  | 4.9603  | -0.0475 |
| C | 0.022   | 5.6451  | 0.0469  | C | -0.0028 | 5.6113  | -0.0434 | C | 0.0071  | 5.5888  | -0.0511 |
| H | 0.027   | -6.8691 | 0.0827  | H | -0.0059 | -6.8172 | 0.2262  | H | 0.0084  | -6.824  | 0.1539  |
| H | 2.4865  | -6.8691 | 0.082   | H | 2.4542  | -6.8173 | 0.2255  | H | 2.4683  | -6.8242 | 0.1541  |
| H | 4.9471  | -6.8689 | 0.0816  | H | 4.9143  | -6.8167 | 0.2264  | H | 4.9285  | -6.8238 | 0.1539  |
| H | 7.4064  | -6.869  | 0.0822  | H | 7.3744  | -6.8173 | 0.226   | H | 7.3884  | -6.8242 | 0.1546  |
| H | 1.981   | 7.4951  | -0.7922 | H | 2.4652  | 6.7302  | -0.0445 | H | 2.4709  | 6.7328  | -0.0436 |
| H | 4.947   | 6.688   | 0.0758  | H | 4.9119  | 6.7258  | -0.0466 | H | 4.9264  | 6.7261  | -0.0311 |
| H | 7.3684  | 6.6784  | -0.087  | H | 7.3177  | 6.7288  | -0.0896 | H | 7.3753  | 6.7317  | 0.0023  |
| H | -0.7595 | 7.564   | 0.6267  | H | -1.1121 | 7.8686  | 0.2805  | H | -0.489  | 7.9834  | -0.9802 |
| C | 0.0979  | 7.0492  | 0.1832  | C | -0.0532 | 8.0202  | 0.2502  | C | -0.0288 | 8.0532  | -0.0146 |
| C | 1.2352  | 7.7823  | -0.0562 | C | 0.9958  | 8.645   | 0.2863  | C | 0.4647  | 8.4672  | 1.02    |

|   |        |        |        |   |        |        |        |   |        |        |        |
|---|--------|--------|--------|---|--------|--------|--------|---|--------|--------|--------|
| H | 1.3033 | 8.8067 | 0.3257 | H | 1.9768 | 9.0736 | 0.3075 | H | 0.9231 | 8.6655 | 1.9676 |
|---|--------|--------|--------|---|--------|--------|--------|---|--------|--------|--------|

## Selection of computational parameters

The modelling of graphene bulk is done by defining a primitive cell which will be repeated in each direction respecting the Periodic Boundary Conditions (PBCs), in this way a three-dimensional material will be represented. Graphene has been modelled as graphene nanoribbons (GNRs) since they are simple systems and representative for the aim of the work. GNRs are composed of hexagonal two-dimensional lattice, and they can have two different edges: armchair and zigzag. The monolayers of graphene have been studied in their form with hydrogen saturating all the carbon atoms at the edges (except the C2H2 addition site), that is because both structures tend to reconstruct when they are self-passivated. The ribbons' width is finite defined by the number of rings repeated in the layer, while the direction perpendicular to the width is infinite. The fundamentals parameter to be used in input to QE (i.e., energy cut-off, k-points and lattice parameters) were selected prior to perform DFT calculations by means of rigorous convergence tests:

- 1)  **$E_{cut}(wfc)$  and  $E_{cut}(rho)$ :** For both the armchair and zigzag, the optimal kinetic energy cut-off of wave functions  $E_{cut}(wfc)$  and kinetic energy cut-off of charge density  $E_{cut}(rho)$  have been evaluated for the bulk graphene structure by evaluating the total energy per atom for different  $E_{cut}(rho)$ . The values of 200 Ry for  $E_{cut}(rho)$  and 40 Ry for  $E_{cut}(wfc)$  are selected (for both the armchair and zigzag system) since for these values the total energy of the system per atom goes to convergence (Figure 1).

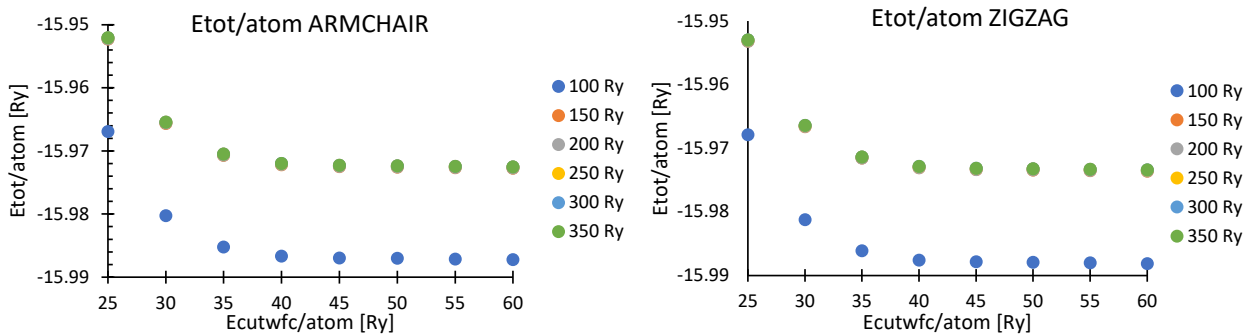

Figure S5: Total energy of the system per atom [Ry] with respect to  $E_{cut}(rho)$  and  $E_{cut}(wfc)$  for armchair (left) and zig-zag (right) graphene.

- 2) **k-points:** The optimal values of points in k-space have been chosen by computing the total energy of the system by varying k-points (from 2 to 7) and by choosing the one for which the total energy converges. Thus, an optimal value of k-points of 5 is chosen for both armchair and zigzag system (Figure 2).

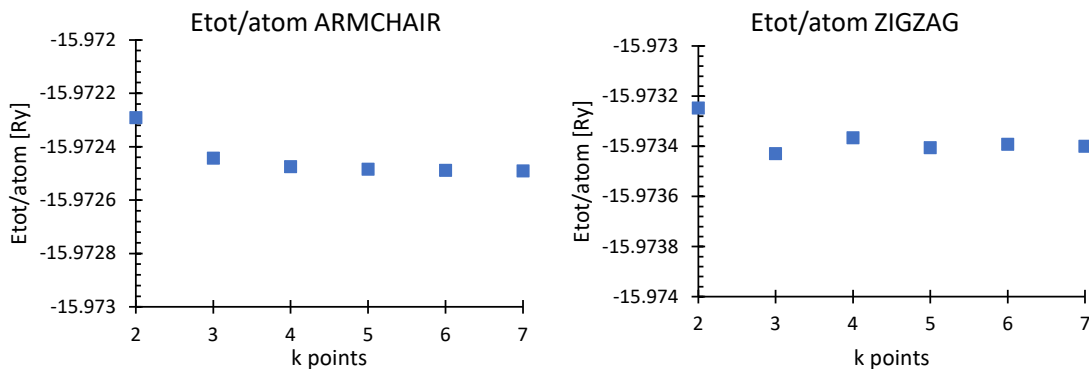

Figure S6: Total energy of the system [Ry] per atom with respect to k-points for armchair (left) and zig-zag (right) graphene.

- 3) **Unit cells dimension:** In order to assess an optimal dimension of the slabs studied in this work, the methodology consisted in performing a thorough binding energy convergence analysis for the addition of



acetylene on graphene. Thus, we calculated the variation of the C-H binding energy for an H-passivated edge ( $E_{C-H}$ ) and the acetylene binding energy  $E_{C_2H_2-binding}$  (R1 and R2) at different dimensions of the unit cell, by changing the width of graphene along the x direction, the width of graphene along the y direction and the void space between two repeated images along the z direction.

$$\text{R1. } E_{C-H} = \left( E_{\text{graphene}_H} + \frac{1}{2} E_{H_2} \right) - E_{\text{graphene}}$$

$$\text{R2. } E_{C_2H_2-binding} = \left( E_{\text{graphene}_H} + \frac{1}{2} E_{C_2H_2} \right) - E_{\text{graphene} + C_2H_2}$$

Here,  $E_{\text{graphene}_H}$  is the energy of graphene with one non-saturated carbon atom,  $E_{H_2}$  is the energy of a  $H_2$  molecule,  $E_{\text{graphene}}$  is the energy of a completely passivated graphene,  $E_{\text{graphene} + C_2H_2}$  is the energy of a graphene with one non-saturated carbon atom together with a  $C_2H_2$  molecule and  $E_{C_2H_2}$  is the energy of a  $C_2H_2$  molecule alone.

These energies have been obtained by relaxing the cell and atoms positions in the cell: the results are ground state energies for the configurations of interest. So, a relaxation of all the structures involved in  $H$  scission and  $C_2H_2$  binding has been done at various values of  $\text{celldm}(2)$  (width of graphene along the x direction), and after that  $E_{C-H}$  and  $E_{C_2H_2-binding}$  are plotted to check to find the values where the energy values reach convergence. Thus values of  $\text{celldm}(2)$  of 2.8 and 2.3 are selected for the armchair and zigzag cells, respectively (Figure 3).

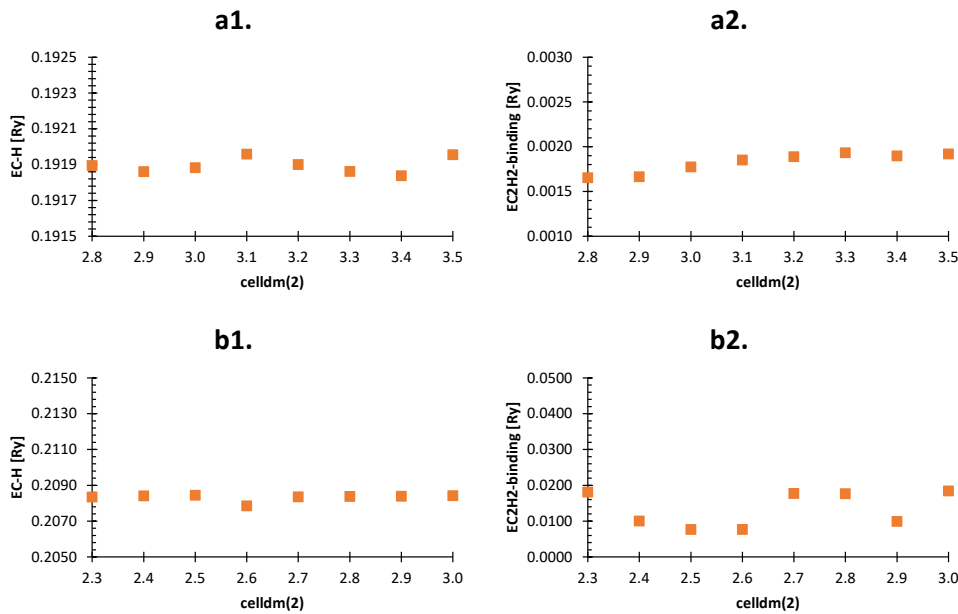

Figure S7:  $H$  scission energy [ $E_{C-H}$ , Ry] and  $C_2H_2$  binding energy [ $E_{C_2H_2-binding}$ , Ry] varying the width of graphene along the x direction (i.e.,  $\text{celldm}(2)$ ) for armchair (a1. and a2., respectively) and zigzag (b1. and b2., respectively) graphene edges.

## Hindered rotor effects

The hindered rotor (HR) treatment can significantly influence the estimation of kinetic rates and overall reactivity in reactions involving molecules in which atoms can rotate along a chemical bond. Thus, in the investigated system, it is important to account for this aspect in the entrance and exit channels involving intermediates with the ethenyl group ( $R-CH=\dot{C}H$ ) at the edge (A1, B1, C1, and Z1, X1 in the armchair and zigzag systems, respectively). However, after verifying that the influence on analogous gas phase processes was minimal (Figure S9), we decided to adopt a slightly different approach that still allows us to address this aspect, as discussed below.

For the armchair system, all configurations resulting from the addition of  $C_2H_2$  at the carbon site were considered as distinct species. Thus, all three isomers A1, B1, and C1 are included in the potential energy surface (see Figure 3 in the main text). The barrier associated with surface- $C_2H_2$  torsion between A1 and B1 is accounted for in the potential energy surface and yields results very similar to the torsion observed in the gas phase system (5.3 and 4.6 kcal/mol for the solid and gas system, respectively). Considering that the partition functions of different configurations provide an overall statistical averaging in the final lumped rate constants, we considered that the net result should closely resemble that of a hindered rotor treatment.

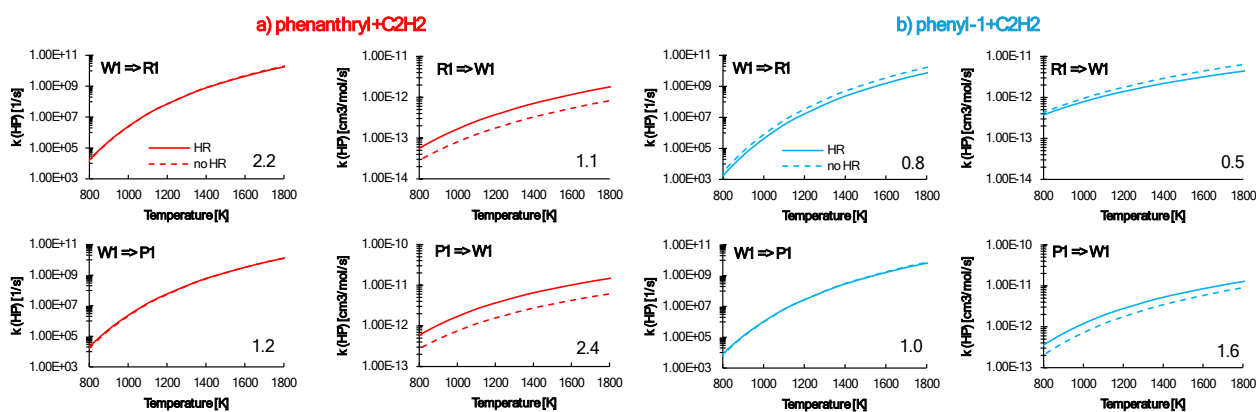

Figure S8: Comparison of rate constants with (solid lines) and without (dotted lines) the HR treatment for the phenanthryl+ $C_2H_2$  (a) and phenyl+ $C_2H_2$  (b) systems. R1 denotes the entrance channel (phenanthryl/phenyl+ $C_2H_2$ ), W1 denotes the radicals formed by the addition of  $C_2H_2$ , and P1 denotes the ethynylphenanthrene/1-ethynyl-naphthalene+H products. The number reported in the bottom right of each plot corresponds to the correction factors applied to the solid phase rates of analogous steps reported in Table S2.

In the zigzag system, only the two isomers Z1 and X1, with the H atoms of the  $C_2H_2$  fragment in cis and trans positions, were considered. The torsion of  $C_2H_2$  in these intermediates produces equivalent species that were not explicitly included. After confirming the consistency of the torsional barrier with the analogous gas-phase system (Figure S9), a correction was applied to the kinetic constant of the  $C_2H_2$  addition and H elimination step to address the effects of the hindered rotor treatment. The corrective factors were derived as the maximum deviation within the temperature range of interest (800-1800 K) of the rates in the analogous gas phase steps, with and without the HR treatment (Figure S9b). In Table S3, the original pre-exponential factors of these reactions (marked with an \*) are reported in brackets.

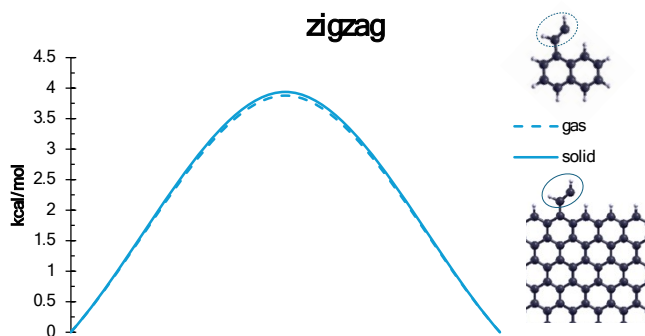

Figure S9: Torsional potential [kcal/mol] related to the torsion in the ethenyl group ( $R-CH=\dot{C}H$ ) at the zigzag edge (solid line) and in the analogous gas phase molecule (dotted line).

## References:

- [1] M. Frenklach, R.I. Singh, A.M. Mebel, On the low-temperature limit of HACA, *Proceedings of the Combustion Institute*. 37 (2019) 969–976. <https://doi.org/10.1016/j.proci.2018.05.068>.
- [2] M. Frenklach, H. Wang, Detailed modeling of soot particle nucleation and growth, *Symposium (International) on Combustion*. 23 (1991) 1559–1566. [https://doi.org/10.1016/S0082-0784\(06\)80426-1](https://doi.org/10.1016/S0082-0784(06)80426-1).
- [3] L.P. Maffei, M. Pelucchi, C. Cavallotti, A. Bertolino, T. Faravelli, Master equation lumping for multi-well potential energy surfaces: A bridge between ab initio based rate constant calculations and large kinetic mechanisms, *Chemical Engineering Journal*. 422 (2021) 129954. <https://doi.org/10.1016/j.cej.2021.129954>.
